# Supplementary material for: Comparative Analyses of Transcriptional Profiles in Mouse Organs Using a Pneumonic Plague Model after Infection with Wild-TypeYersinia pestisCO92 and Its Braun Lipoprotein Mutant
Source: Hindawi journal article supplement (doi:10.1155/2009/914762), 2009-01-01
Supplement: f1 [file 914762.f1.pdf]

**Supplementary Content:****Supplementary Table I. Experimental summary**

| <b>Arrays (3 each)</b> | <b>Treatment</b> | <b>Length of infection</b> | <b>Tissue</b> |
|------------------------|------------------|----------------------------|---------------|
| Control (C)            | Uninfected       | -                          | Liver         |
| WT                     | WT-infected      | 12 hours                   |               |
| Mut                    | Mutant-infected  |                            |               |
| WT                     | WT-infected      | 48 hours                   |               |
| Mut                    | Mutant-infected  |                            |               |
| Control (C)            | Uninfected       | -                          |               |
| WT                     | WT-infected      | 12 hours                   |               |
| Mut                    | Mutant-infected  |                            |               |
| WT                     | WT-infected      | 48 hours                   |               |
| Mut                    | Mutant-infected  |                            |               |
| Control (C)            | Uninfected       | -                          | Spleen        |
| WT                     | WT-infected      | 12 hours                   |               |
| Mut                    | Mutant-infected  |                            |               |
| WT                     | WT-infected      | 48 hours                   |               |
| Mut                    | Mutant-infected  |                            |               |

WT=wild-type *Y. pestis* CO92; Mut= $\Delta lpp$  mutant of *Y. pestis* CO92

**Supplementary Table II. Genes statistically differentially expressed in the livers, lungs and spleens of mice infected with WT *Y. pestis* CO92, compared to uninfected mice**

| GenBank ID | Gene Name                                                                                              | Control vs WT <i>Y. pestis</i> CO92 |      |      |      |        |      |
|------------|--------------------------------------------------------------------------------------------------------|-------------------------------------|------|------|------|--------|------|
|            |                                                                                                        | Liver                               |      | Lung |      | Spleen |      |
|            |                                                                                                        | 12 h                                | 48 h | 12 h | 48 h | 12 h   | 48 h |
|            |                                                                                                        | FC                                  |      |      |      |        |      |
| BE952632   | 2-4-dienoyl-Coenzyme A reductase 2, peroxisomal (decr2)                                                | -                                   | -2.5 | -    | -    | -      | -    |
| BC018470   | 2'-5' oligoadenylate synthetase 1A (Oas1a)                                                             | -                                   | -    | -    | 2.4  | -      | -    |
| AB067534   | 2'-5' oligoadenylate synthetase 3 (Oas3)                                                               | -                                   | -    | -    | 2    | -      | -    |
| BQ033138   | 2'-5' oligoadenylate synthetase-like 2 (Oasl2)                                                         | -                                   | 5.1  | -    | -    | -      | 5.2  |
| AK007603   | 3-hydroxybutyrate dehydrogenase, type 2 (Bdh2)                                                         | -                                   | -2.7 | -    | -    | -      | -    |
| AV213379   | 3-oxoacid CoA transferase 1 (Oxct1)                                                                    | -                                   | 3.5  | -    | -    | -      | -    |
| BC010837   | 4-nitrophenylphosphatase domain and non-neuronal SNAP25-like protein homolog 1 (ipsnap1)               | -                                   | -2.5 | -    | -    | -      | -    |
| NM_133232  | 6-phosphofructo-2-kinase/fructose-2,6-biphosphatase 3 (Pfkfb3)                                         | -                                   | 16.1 | -    | 3.5  | -      | -    |
| BG064671   | A disintegrin-like and metalloprotease (reprolysin type) with thrombospondin type 1 motif, 4 (ADAMTS4) | -                                   | 2.4  | -    | 2.6  | -      | -    |
| NM_031185  | A kinase (PRKA) anchor protein (gravin) 12 (Akap12)                                                    | -                                   | 6.8  | -    | -    | -      | -    |
| AI649048   | A kinase (PRKA) anchor protein 2 (Akap2)                                                               | -                                   | 6.4  | -    | -    | -      | -    |
| BB317588   | AarF domain containing kinase 5 (Adck5)                                                                | -                                   | -2.4 | -    | -    | -      | -    |
| AV009478   | Abhydrolase domain containing 14A (Abhd14a)                                                            | -                                   | -2.1 | -    | -    | -      | -    |
| NM_025341  | Abhydrolase domain containing 6 (Abhd6)                                                                | -                                   | -2.5 | -    | -    | -      | -    |
| NM_130864  | Acetyl-Coenzyme A acyltransferase 1A (Acaa1a)                                                          | -                                   | -2.8 | -    | -    | -      | -    |
| BC019882   | Acetyl-Coenzyme A acyltransferase 1B (Acaa1b)                                                          | -                                   | -3.9 | -    | -    | -      | -    |
| BB183525   | Acid phosphatase-like 2 (Acpl2)                                                                        | -                                   | -3.4 | -    | -    | -      | -    |
| AF022957   | Acidic (leucine-rich) nuclear phosphoprotein 32 family, member A (Anp32a)                              | -                                   | -2.3 | -    | -    | -      | -    |
| NM_007392  | Actin, alpha 2, smooth muscle, aorta (Acta2)                                                           | -                                   | 2    | -    | -    | -      | -    |
| NM_013798  | Actin, gamma, cytoplasmic 1 (Actg1)                                                                    | -                                   | 2.2  | -    | -    | -      | -    |
| BC003232   | Actinin, alpha 1 (Actn1)                                                                               | -                                   | 2.2  | -    | -    | -      | -    |
| BC019946   | Activating transcription factor 3 (Atf3)                                                               | -                                   | 3.2  | -    | 2.5  | -      | -    |
| BQ043509   | Activin A receptor, type 1B (Acvr1b)                                                                   | -                                   | 2.3  | -    | -    | -      | -    |
| BC014291   | Activin A receptor, type II-like 1 (Acvr11)                                                            | -                                   | 2.9  | -    | -    | -      | -    |
| BC006692   | Acyl-CoA synthetase long-chain family member 1 (Acsl1)                                                 | -                                   | -2.8 | -    | -    | -      | -    |
| AB078618   | Acyl-CoA thioesterase 12 (Acot12)                                                                      | -                                   | -3.2 | -    | -    | -      | -    |
| NM_134246  | Acyl-CoA thioesterase 3 (Acot3)                                                                        | -                                   | -3   | -    | -    | -      | -    |
| AA571017   | Acyl-CoA thioesterase 4 (Acot4)                                                                        | -                                   | -2.5 | -    | -    | -      | -    |

|           |                                                                                 |      |       |     |     |   |   |
|-----------|---------------------------------------------------------------------------------|------|-------|-----|-----|---|---|
| NM_022816 | Acyl-CoA thioesterase 9 (Acot9)                                                 | -    | 2.6   | -   | -   | - | - |
| BI790311  | Acyl-Coenzyme A binding domain containing 3 (Acbd3)                             | -    | 2.1   | -   | -   | - | - |
| BG068664  | Acyltransferase like 2 (AytI2)                                                  | -    | 2.4   | -   | -   | - | - |
| BB185861  | Adaptor-related protein complex 1, sigma 2 subunit (Ap1s2)                      | -    | 2.6   | -   | -   | - | - |
| BB746807  | Adenylate cyclase 7 (Adcy7)                                                     | -    | 2     | -   | -   | - | - |
| BI653265  | ADP-ribosylation factor 4 (Arf4)                                                | -    | 2.1   | -   | -   | - | - |
| BG067878  | ADP-ribosylation factor GTPase activating protein 3 (Arfgap3)                   | -    | 2.2   | -   | -   | - | - |
| AU043075  | ADP-ribosylation factor interacting protein 2 (Arfp2)                           | -    | 2.1   | -   | -   | - | - |
| NM_024191 | ADP-ribosylation factor-like 2 binding protein (Arl2bp)                         | -    | 2.1   | -   | -   | - | - |
| AV328143  | ADP-ribosylation factor-like 4A (Arl4a)                                         | -2.1 | -     | -   | -   | - | - |
| BB391602  | Adrenergic receptor kinase, beta 2 (Adrbk2)                                     | -    | 2     | -   | -   | - | - |
| AV083350  | Adrenergic receptor, beta 2 (Adrb2)                                             | -    | 10    | -   | -   | - | - |
| NM_009627 | Adrenomedullin (Adm)                                                            | -    | 5.5   | -   | 2.1 | - | - |
| BB532535  | Advanced glycosylation end product-specific receptor (Ager)                     | -    | 27.4  | -   | -   | - | - |
| BG064927  | AE binding protein 2 (Aebp2)                                                    | -    | 2     | -   | -   | - | - |
| BC026681  | Afamin (Afm)                                                                    | -    | -2.3  | -   | -   | - | - |
| BE570050  | AHNAK nucleoprotein (desmoyokin) (Ahnak)                                        | -    | 7.4   | -   | -   | - | - |
| NM_016702 | Alanine-glyoxylate aminotransferase (Agxt)                                      | -    | -2.4  | -   | -   | - | - |
| AK005060  | Alanine-glyoxylate aminotransferase 2-like 1 (Agxt2l1)                          | -    | -12.2 | -   | -   | - | - |
| BC020001  | Aldehyde dehydrogenase 1 family, member B1 (Aldh1b1)                            | -    | -3.8  | -   | -   | - | - |
| BB251523  | Aldehyde dehydrogenase 18 family, member A1 (Aldh18a1)                          | -    | 3.7   | -   | -   | - | - |
| NM_007436 | Aldehyde dehydrogenase family 3, subfamily A1 (Aldh3a1)                         | -    | -     | 3.2 | -   | - | - |
| BQ175320  | Aldehyde dehydrogenase family 5, subfamily A1 (Aldh5a1)                         | -    | -3    | -   | -   | - | - |
| AV021656  | Aldo-keto reductase family 1, member B7 (Akr1b7)                                | 2.1  | -     | -   | -   | - | - |
| NM_054080 | Aldo-keto reductase family 1, member C20 (Akr1c20)                              | -    | -3.5  | -   | -   | - | - |
| BC018333  | Aldo-keto reductase family 1, member D1 (Akr1d1)                                | -    | -5    | -   | -   | - | - |
| NM_025337 | Aldo-keto reductase family 7, member A5 (aflatoxin aldehyde reductase) (Akr7a5) | -    | -2    | -   | -   | - | - |
| BG065457  | Aldolase 1, A isoform (Aldoa)                                                   | -    | 5.8   | -   | -   | - | - |
| BI903628  | AlkB, alkylation repair homolog 7 (Alkbh7)                                      | -    | -2.2  | -   | -   | - | - |
| BB185854  | alpha-2-macroglobulin /// hypothetical protein LOC677369                        | -    | 21.5  | -   | -   | - | - |
| NM_008537 | Alpha-methylacyl-CoA racemase (Amacr)                                           | -    | -2.4  | -   | -   | - | - |
| NM_013792 | Alpha-N-acetylglucosaminidase (Sanfilippo disease IIIB) (Naglu)                 | -    | -2.2  | -   | -   | - | - |

|           |                                                                  |      |      |   |      |     |   |
|-----------|------------------------------------------------------------------|------|------|---|------|-----|---|
| BB797326  | Amidohydrolase domain containing 1 (Amdhd1)                      | -2.7 | -    | - | -    | -   | - |
| NM_025371 | Aminoacylase 1 (Acy1)                                            | -    | -2.7 | - | -    | -   | - |
| BC018236  | Aminolevulinate, delta-, dehydratase (Alad)                      | -    | -2.4 | - | -    | -   | - |
| BC022110  | Aminolevulinic acid synthase 1 (Alas1)                           | 3.4  | -    | - | -    | -   | - |
| D85596    | AMP deaminase 3 (Ampd3)                                          | -    | 6.4  | - | -    | -   | - |
| NM_007446 | Amylase 1, salivary (Amy1)                                       | -    | -    | - | -    | 3.3 | - |
| BB006088  | Amylo-1,6-glucosidase, 4-alpha-glucanotransferase (Agl)          | -    | -2   | - | -    | -   | - |
| BC005490  | Amyloid beta (A4) precursor protein (App)                        | -    | 2    | - | -    | -   | - |
| AB053307  | Amyotrophic lateral sclerosis 2 (juvenile) homolog (Als2)        | -    | -2   | - | -    | -   | - |
| BF322051  | Anaphase promoting complex subunit 10 (Anapc10)                  | -    | 2    | - | -    | -   | - |
| BC019491  | Angiopoietin-like 3 (Angptl3)                                    | -    | -2.4 | - | -    | -   | - |
| NM_020581 | Angiopoietin-like 4 (Angptl4)                                    | -    | -    | - | 3.9  | -   | - |
| BC025904  | Angiopoietin-like 6 (Angptl6)                                    | -    | -2.1 | - | -    | -   | - |
| M55333    | Angiotensin I converting enzyme (peptidyl-dipeptidase A) 1 (Ace) | -    | 4.2  | - | -    | -   | - |
| BB483357  | Angiotensin receptor-like 1 (Agtr1)                              | -    | -    | - | -2.4 | -   | - |
| BB621938  | Ankyrin repeat and BTB (POZ) domain containing 2 (Abtb2)         | -    | -3   | - | -    | -   | - |
| AK003441  | Ankyrin repeat and KH domain containing 1 (Ankhd1)               | -    | 3    | - | -    | -   | - |
| AK009959  | Ankyrin repeat domain 1 (cardiac muscle) (Ankrd1)                | -    | 3    | - | -    | -   | - |
| NM_133971 | Ankyrin repeat domain 10 (Ankrd10)                               | -    | -    | - | -    | 2.2 | - |
| BQ032773  | Ankyrin repeat domain 15 (Ankrd15)                               | -    | -2.3 | - | -    | -   | - |
| AK017778  | Ankyrin repeat domain 24 (Ankrd24)                               | -    | -2.1 | - | -    | -   | - |
| AV256780  | Ankyrin repeat domain 44 (Ankrd44)                               | -    | 2.3  | - | -    | -   | - |
| BM119297  | Ankyrin repeat domain 57 (Ankrd57)                               | -    | 3.5  | - | -    | -   | - |
| NM_010730 | Annexin A1 (Anxa1)                                               | -    | 5.5  | - | -    | -   | - |
| NM_007585 | Annexin A2 (Anxa2)                                               | -    | 3.6  | - | -    | -   | - |
| AW702161  | Annexin A3 (Anxa3)                                               | -    | 6.6  | - | -    | -   | - |
| D63423    | Annexin A5 (Anxa5)                                               | -    | 2.3  | - | -    | -   | - |
| AF378762  | Anthrax toxin receptor 1 (Antxr1)                                | -    | 3.1  | - | -    | -   | - |
| AK018646  | Apolipoprotein L3 (Apol3)                                        | -    | -6.3 | - | -    | -   | - |
| BB449248  | Apoptosis inhibitor 5 (Api5)                                     | -    | 2.8  | - | -    | -   | - |
| BB229969  | Aquaporin 11 (Aqp11)                                             | -    | -3   | - | -    | -   | - |
| BC024105  | Aquaporin 9 (Aqp9)                                               | -    | -2.2 | - | -    | -   | - |
| BC026209  | Arachidonate 5-lipoxygenase activating protein (Alox5ap)         | -    | 2.6  | - | -    | -   | - |
| AK014338  | Arginine-rich, mutated in early stage tumors (Armet)             | -    | 2    | - | -    | -   | - |
| AK004598  | Armadillo repeat containing, X-linked 3 (Armxc3)                 | -    | 2.6  | - | -    | -   | - |
| BE865094  | Armadillo repeat containing, X-linked 4 (Armxc4)                 | -    | 2.6  | - | -    | -   | - |
| AW542672  | Arrestin domain containing 2 (Arrdc2)                            | -    | -    | - | 2    | -   | - |
| BG072824  | Arrestin domain containing 3 (Arrdc3)                            | -3   | -    | - | -    | -   | - |

|           |                                                                                   |      |      |   |     |     |   |
|-----------|-----------------------------------------------------------------------------------|------|------|---|-----|-----|---|
| BC011080  | Aryl hydrocarbon receptor nuclear translocator-like (Arntl)                       | -2.1 | -    | - | -   | -   | - |
| AK004030  | Arylformamidase (Afmid)                                                           | -    | -3.7 | - | -   | -   | - |
| AV212753  | Asparagine synthetase (Asns)                                                      | -    | 5.1  | - | -   | -   | - |
| AK013880  | Asparaginyl-tRNA synthetase (Nars)                                                | -    | 2    | - | -   | -   | - |
| NM_027857 | Aspartoacylase (aminoacylase) 3 (Acy3)                                            | -    | -4.6 | - | -   | -   | - |
| BC027152  | AT rich interactive domain 5A (Mrf1 like) (Arid5a)                                | -    | 2.7  | - | -   | -   | - |
| BB303874  | ATPase, aminophospholipid transporter (APLT), class I, type 8A, member 1 (Atp8a1) | -    | 4    | - | -   | -   | - |
| BB016769  | ATPase, Class V, type 10D (Atp10d)                                                | -    | 3.5  | - | -   | -   | - |
| AV378604  | ATPase, class VI, type 11A (Atp11a)                                               | -    | 8.2  | - | -   | -   | - |
| BM237637  | Atpase, class VI, type 11C (Atp11c)                                               | -    | -    | - | -   | 2.1 | - |
| BG072708  | ATPase, Cu <sup>++</sup> transporting, alpha polypeptide (Atp7a)                  | -    | 2.5  | - | -   | -   | - |
| BB144704  | ATP-binding cassette, sub-family A (ABC1), member 1 (Abca1)                       | -    | 2.2  | - | -   | -   | - |
| BC026496  | ATP-binding cassette, sub-family A (ABC1), member 8a (Abca8)                      | -    | -4.8 | - | -   | -   | - |
| NM_008830 | ATP-binding cassette, sub-family B (MDR/TAP), member 4 (Abcb4)                    | -    | -2   | - | -   | -   | - |
| NM_023732 | ATP-binding cassette, sub-family B (MDR/TAP), member 6 (Abcb6)                    | -    | -2.9 | - | -   | -   | - |
| NM_018795 | ATP-binding cassette, sub-family C (CFTR/MRP), member 6 (Abcc6)                   | -    | -4.3 | - | -   | -   | - |
| AW456685  | ATP-binding cassette, sub-family D (ALD), member 2 (Abcd2)                        | -    | -2.6 | - | -   | -   | - |
| NM_031884 | ATP-binding cassette, sub-family G (WHITE), member 5 (Abcg5)                      | -    | -4.2 | - | -   | -   | - |
| AF324495  | ATP-binding cassette, sub-family G (WHITE), member 8 (Abcg8)                      | -    | -2.6 | - | -   | -   | - |
| AV323441  | Avian musculoaponeurotic fibrosarcoma (v-maf) AS42 oncogene homolog (Maf)         | -    | -    | - | -   | 2.1 | - |
| NM_009046 | Avian reticuloendotheliosis viral (v-rel) oncogene related B (Relb)               | -    | 3.7  | - | -   | -   | - |
| BG070296  | AXIN1 up-regulated 1 (Axud1)                                                      | -    | 2    | - | 3.2 | -   | - |
| NM_007465 | Baculoviral IAP repeat-containing 2 (Birc2)                                       | -    | 2.7  | - | -   | -   | - |
| NM_007464 | Baculoviral IAP repeat-containing 3 (Birc3)                                       | -    | 2.4  | - | -   | -   | - |
| BC004826  | Basal cell adhesion molecule (Bcam)                                               | -    | 3.2  | - | -   | -   | - |
| BC011486  | Basic helix-loop-helix domain containing, class B, 8 (Bhlhb8)                     | -    | 3.2  | - | -   | -   | - |
| AK016990  | Basic leucine zipper transcription factor, ATF-like 2 (Batf2)                     | -    | 2.7  | - | 4.5 | -   | - |
| BI697337  | Basic, immunoglobulin-like variable motif containing (Bivm)                       | -    | -2   | - | -   | -   | - |
| AF100339  | B-cell leukemia/lymphoma 10 (Bcl10)                                               | -    | 2    | - | -   | -   | - |
| L16462    | B-cell leukemia/lymphoma 2 related protein A1a (Bcl2a1a)                          | -    | 5.4  | - | -   | -   | - |
| NM_033601 | B-cell leukemia/lymphoma 3 (Bcl3)                                                 | -    | 3.1  | - | 3.3 | -   | - |

|           |                                                                              |      |      |   |     |     |   |
|-----------|------------------------------------------------------------------------------|------|------|---|-----|-----|---|
| NM_007570 | B-cell translocation gene 2, anti-proliferative (Btg2)                       | -    | 3.5  | - | -   | -   | - |
| NM_009770 | B-cell translocation gene 3 (Btg3)                                           | -    | 6.4  | - | -   | -   | - |
| AW489168  | Bcl-2 binding component 3 (Bbc3)                                             | -    | -2.7 | - | -   | -   | - |
| BB212341  | Bcl2 modifying factor (Bmf)                                                  | -2.4 | -    | - | -   | -   | - |
| NM_007546 | Bcl2-interacting kille (Bik)                                                 | -2.1 | -3.2 | - | -   | -   | - |
| BG075800  | Beta galactoside alpha 2,6 sialyltransferase 1 (St3gal1)                     | -    | 2.3  | - | -   | -   | - |
| NM_133217 | Beta-carotene 9', 10'-dioxygenase 2 (Bcdo2)                                  | -    | -2.7 | - | -   | -   | - |
| BM217996  | Bicaudal C homolog 1 (Bicc1)                                                 | -    | 2.3  | - | -   | -   | - |
| AK014221  | BMP-binding endothelial regulator (Bmper)                                    | -    | 3.4  | - | -   | -   | - |
| AI647987  | Bone marrow stromal cell antigen 1 (Bst1)                                    | -    | 3.6  | - | -   | -   | - |
| AW546137  | Bone morphogenic protein receptor, type II (serine/threonine kinase) (Bmpr2) | -    | 2.5  | - | -   | -   | - |
| AK011545  | Brain abundant, membrane attached signal protein 1 (Basp1)                   | -    | 5    | - | -   | -   | - |
| NM_009052 | Brain expressed gene 1 (Bex1)                                                | -    | 2    | - | -   | -   | - |
| AF390178  | Brain-specific angiogenesis inhibitor 1-associated protein 2 (Baiap2)        | -    | -2.1 | - | -   | -   | - |
| BB363154  | Bri3 binding protein (Bri3bp)                                                | -    | -2   | - | -   | -   | - |
| AV357135  | Bromodomain adjacent to zinc finger domain 1A (Baz1a)                        | -    | 3.2  | - | -   | -   | - |
| BB380312  | Bromodomain PHD finger transcription factor (Bptf)                           | -    | -    | - | -   | 2.5 | - |
| AV324314  | BTB and CNC homology 1 (Bach1)                                               | -    | 2.2  | - | -   | -   | - |
| NM_009866 | Cadherin 11 (Cdh11)                                                          | -    | 5.6  | - | -   | -   | - |
| NM_009868 | Cadherin 5 (Cdh5)                                                            | -    | 3.6  | - | -   | -   | - |
| AF209905  | Calcitonin receptor-like (Calcr1)                                            | -    | 3    | - | -   | -   | - |
| BG071931  | Calcium/calmodulin-dependent protein kinase ID (Camk1d)                      | -2.2 | -2.8 | - | -   | -   | - |
| BG862223  | Calcium/calmodulin-dependent protein kinase II, beta (Camk2b)                | -    | 8.8  | - | 3.5 | -   | - |
| BI663014  | Calponin 2 (Cnn2)                                                            | -    | 2    | - | -   | -   | - |
| NM_023160 | Camello-like 1 (Cml1)                                                        | -    | -5.2 | - | -   | -   | - |
| BB230757  | cAMP responsive element binding protein 3-like 2 (Creb3l2)                   | -    | 2    | - | -   | -   | - |
| AK007209  | Capping protein (actin filament) muscle Z-line, beta (Capzb)                 | -    | 2.1  | - | -   | -   | - |
| NM_007599 | Capping protein (actin filament), gelsolin-like (Capg)                       | -    | 2.5  | - | -   | -   | - |
| NM_011797 | Carbonic anhydrase 14 (Car14)                                                | -    | -3.3 | - | -   | -   | - |
| BB213876  | Carbonic anhydrase 3 (Car3)                                                  | -    | -2.3 | - | -   | -   | - |
| NM_007607 | Carbonic anhydrase 4 (Car4)                                                  | -    | 7.1  | - | -   | -   | - |
| NM_007608 | Carbonic anhydrase 5a, mitochondrial (Car5a)                                 | -    | -4.1 | - | -   | -   | - |
| BC010758  | Carbonyl reductase 2 (Cbr2)                                                  | -    | 30.9 | - | -   | -   | - |
| BC022148  | Carboxylesterase 5 (Ces5)                                                    | -    | -2.3 | - | -   | -   | - |
| AW550842  | Carboxypeptidase D (Cpd)                                                     | -    | 2    | - | -   | -   | - |
| BC010197  | Carboxypeptidase E (Cpe)                                                     | -    | 2.7  | - | -   | -   | - |
| AK017670  | Carboxypeptidase M (Cpm)                                                     | -    | 3.9  | - | -   | -   | - |
| BF020441  | Caseinolytic protease X (Clpx)                                               | -2.4 | -    | - | -   | -   | - |

|           |                                                                                                              |    |      |   |     |     |     |
|-----------|--------------------------------------------------------------------------------------------------------------|----|------|---|-----|-----|-----|
| BC008152  | Caspase 1 (Casp1)                                                                                            | -  | 2    | - | -   | -   | -   |
| NM_009808 | Caspase 12 (Casp12)                                                                                          | -  | 3.2  | - | -   | -   | -   |
| NM_007609 | Caspase 4, apoptosis-related cysteine peptidase (Casp4)                                                      | -  | 7    | - | -   | -   | -   |
| NM_011997 | Caspase 8 associated protein 2 (Casp8ap2)                                                                    | -  | 2    | - | -   | -   | -   |
| BM247599  | Catalase (Cat)                                                                                               | -  | -2.7 | - | -   | -   | -   |
| NM_021281 | Cathepsin S (Ctss)                                                                                           | -  | 2.1  | - | -   | -   | -   |
| NM_007674 | Caudal type homeo box 4 (Cdx4)                                                                               | -  | -2.3 | - | -   | -   | -   |
| NM_016900 | Caveolin 2 (Cav2)                                                                                            | -  | 6.1  | - | -   | -   | -   |
| AB029929  | Caveolin, caveolae protein 1 (Cav1)                                                                          | -  | 10.4 | - | -   | -   | -   |
| AB012278  | CCAAT/enhancer binding protein (C/EBP), beta (Cebpb)                                                         | -  | 4.4  | - | -   | -   | -   |
| BB831146  | CCAAT/enhancer binding protein (C/EBP), delta (Cebpd)                                                        | -  | 18.1 | - | 9.2 | -   | -   |
| AF199491  | CCR4 carbon catabolite repression 4-like (Ccrn4l)                                                            | 14 | 3.9  | - | -   | -   | -   |
| NM_009841 | CD14 antigen (Cd14)                                                                                          | -  | 30.9 | - | 4.3 | -   | 2.3 |
| BC027283  | CD177 antigen (Cd177)                                                                                        | -  | 2.5  | - | 5.5 | -   | -   |
| AF004023  | Cd200 antigen (Cd200)                                                                                        | -  | 5.7  | - | -   | -   | -   |
| BB560574  | CD24a antigen (Cd24a)                                                                                        | -  | 12.8 | - | -   | -   | -   |
| NM_021893 | CD274 antigen (Cd274)                                                                                        | -  | 7.9  | - | 6.9 | -   | -   |
| NM_133654 | CD34 antigen (Cd34)                                                                                          | -  | 3.7  | - | -   | -   | -   |
| AI385482  | CD40 antigen (Cd40)                                                                                          | -  | 2.6  | - | -   | -   | -   |
| AW146109  | CD44 antigen (Cd44)                                                                                          | -  | 5.4  | - | -   | -   | -   |
| NM_013706 | CD52 antigen (Cd52)                                                                                          | -  | 2.4  | - | -   | -   | -   |
| NM_007651 | CD53 antigen (Cd53)                                                                                          | -  | 3.1  | - | -   | -   | -   |
| NM_010016 | CD55 antigen (Cd55)                                                                                          | -  | 2.2  | - | -   | -   | -   |
| AK017979  | CD69 antigen (Cd69)                                                                                          | -  | 2.7  | - | -   | 2.5 | -   |
| BC003476  | CD74 antigen (invariant polypeptide of major histocompatibility complex, class II antigen-associated) (Cd74) | -  | 2.6  | - | -   | -   | -   |
| NM_009856 | CD83 antigen (Cd83)                                                                                          | -  | 3.1  | - | -   | -   | -   |
| NM_007657 | CD9 antigen (Cd9)                                                                                            | -  | 2.8  | - | -   | -   | -   |
| BB039247  | CD93 antigen (Cd93)                                                                                          | -  | 4.4  | - | -   | -   | -   |
| BB224362  | CDC14 cell division cycle 14 homolog B (Cdc14b)                                                              | -  | -2.1 | - | -   | -   | -   |
| NM_025415 | CDC28 protein kinase regulatory subunit 2 (Cks2)                                                             | -  | -2.8 | - | -   | -   | -   |
| AV081797  | cDNA (similar to apolipoprotein L, 3, predicted)                                                             | -  | -    | - | -   | 2   | -   |
| NM_009894 | Cell death-inducing DNA fragmentation factor, alpha subunit-like effector B (Cideb)                          | -  | -2.1 | - | -   | -   | -   |
| BE688580  | Centaurin, gamma 2 (Centg2)                                                                                  | -  | 3.2  | - | -   | -   | -   |
| BB667247  | Centrosomal protein 170 (Cep170)                                                                             | -  | 2.5  | - | -   | -   | -   |
| NM_007672 | Cerebellar degeneration-related 2 (Cdr2)                                                                     | -  | 2.7  | - | -   | -   | -   |
| BB009037  | Ceruloplasmin (Cp)                                                                                           | -  | 6.6  | - | -   | -   | 4.7 |
| NM_010216 | c-fos induced growth factor (figf)                                                                           | -  | 2.7  | - | -   | -   | -   |
| BC025169  | ChaC, cation transport regulator-like 1 (Chac1)                                                              | -  | 2.5  | - | -   | -   | -   |

|           |                                                                     |      |      |      |      |     |      |
|-----------|---------------------------------------------------------------------|------|------|------|------|-----|------|
| AK014605  | Chaperone, ABC1 activity of bc1 complex like (Cabc1)                | -2.4 | -5.4 | -    | -    | -   | -    |
| U50712    | Chemokine (C-C motif) ligand 12 (Ccl12)                             | -    | 2.7  | -    | 3.3  | -   | 3.8  |
| NM_011888 | Chemokine (C-C motif) ligand 19 (Ccl19)                             | -    | 3.4  | -    | 2    | -   | -    |
| AF065933  | Chemokine (C-C motif) ligand 2 (Ccl2)                               | -    | 9.2  | -    | 3.4  | -   | -    |
| AF099052  | Chemokine (C-C motif) ligand 20 (Ccl20)                             | -    | -    | 2.4  | -    | -   | -    |
| NM_011337 | Chemokine (C-C motif) ligand 3 (Ccl3)                               | -    | 6.5  | -    | 4.1  | -   | -    |
| AF128218  | Chemokine (C-C motif) ligand 4 (Ccl4)                               | -    | 2.2  | -    | -    | -   | -    |
| BC002073  | Chemokine (C-C motif) ligand 6 (Ccl6)                               | -    | 4.2  | -    | -    | -   | -    |
| AF128196  | Chemokine (C-C motif) ligand 9 (Ccl9)                               | -    | -    | 2.8  | -    | -   | -    |
| AV231648  | Chemokine (C-C motif) receptor 1 (Ccr1)                             | -    | 6.3  | -    | 2.9  | -   | -    |
| AJ318863  | Chemokine (C-C motif) receptor-like 2 (Ccr2)                        | -    | 5.3  | -    | 2.6  | -   | -    |
| NM_008176 | Chemokine (C-X-C motif) ligand 1 (Cxcl1)                            | -    | 23.1 | 6.4  | 17.5 | -   | 14.6 |
| BB554288  | Chemokine (C-X-C motif) ligand 1 (Cxcl1)                            | -    | 7    | -    | 3.6  | -   | -    |
| NM_021274 | Chemokine (C-X-C motif) ligand 10 (Cxcl10)                          | -    | 30.5 | -    | 20   | -   | 6    |
| NM_019494 | Chemokine (C-X-C motif) ligand 11 (Cxcl11)                          | -    | 2    | -    | 10.9 | -   | -    |
| AF030636  | Chemokine (C-X-C motif) ligand 13 (Cxcl13)                          | -    | 17.1 | -    | -    | -   | 2.3  |
| AF252873  | Chemokine (C-X-C motif) ligand 14 (Cxcl14)                          | -    | 2.7  | -    | -    | -   | -    |
| NM_011339 | Chemokine (C-X-C motif) ligand 15 (Cxcl15)                          | -    | 60.9 | -    | -    | -   | -    |
| BC019961  | Chemokine (C-X-C motif) ligand 16 (Cxcl16)                          | -    | 2    | -    | -    | -   | -    |
| NM_009140 | Chemokine (C-X-C motif) ligand 2 (Cxcl2)                            | -    | 53.7 | 7.7  | 18.2 | -   | -    |
| NM_009141 | Chemokine (C-X-C motif) ligand 5 (Cxcl5)                            | -    | 8.8  | 14.6 | 9.3  | -   | 5.3  |
| NM_008599 | Chemokine (C-X-C motif) ligand 9 (Cxcl9)                            | -    | 11.8 | -    | 11.8 | -   | -    |
| D87747    | Chemokine (C-X-C motif) receptor 4 (Cxcr4)                          | -    | -    | -    | -    | 2.2 | -    |
| BC015254  | Chemokine (C-X-C motif) receptor 7 (Cxcl7)                          | -    | 7.6  | -    | -    | -   | -    |
| AW228687  | Chemokine-like receptor 1 (Cmklr1)                                  | -    | 2.3  | -    | -    | -   | -    |
| BC005611  | Chitinase 3-like 1 (Chi3l1)                                         | -    | 11.8 | -    | -    | -   | -    |
| NM_009892 | Chitinase 3-like 3 (Chi3l3)                                         | -    | 51.8 | -    | -    | -   | -    |
| BC011134  | Chitinase, acidic (Chia)                                            | -    | 4.1  | -    | -    | -   | -    |
| AF108501  | Chloride channel calcium activated 1 (Clca1)                        | -    | 2.7  | -    | 5.2  | -   | -    |
| AK009020  | Chloride intracellular channel 3 (Clic3)                            | -    | 3.6  | -    | -    | -   | -    |
| BB814844  | Chloride intracellular channel 4 (mitochondrial) (Clic4)            | -    | 2.8  | -    | -    | -   | -    |
| BB236747  | Chloride intracellular channel 5 (Clic5)                            | -    | 12.1 | -    | -    | -   | -    |
| BQ176424  | Chloride intracellular channel 6 (Clic6)                            | -    | 2    | -    | -    | -   | -    |
| BC020534  | Cholecystokinin A receptor (Cckar)                                  | -    | 4.1  | -    | -    | -   | -    |
| NM_009890 | Cholesterol 25-hydroxylase (Ch25h)                                  | -    | 5.4  | 2.7  | 4    | -   | -    |
| BC023112  | Chondroitin sulfate GalNAcT-2 (Galnact2)                            | -    | 2.5  | -    | -    | -   | -    |
| BI693188  | Chromobox homolog 2 (Cbx2)                                          | -    | -2   | -    | -    | -   | -    |
| AF042158  | Class II transactivator (C2ta)                                      | -    | -    | -    | 2.3  | -   | -    |
| BC021770  | Claudin 10 (Cldn10)                                                 | -    | 2    | -    | -    | -   | -    |
| NM_013805 | Claudin 5 (Cldn5)                                                   | -    | 2.6  | -    | -    | -   | -    |
| BC008104  | Claudin 7 (Cldn7)                                                   | -    | 3    | -    | -    | -   | -    |
| NM_019815 | Claudin 8 (Cldn8)                                                   | -    | 8.9  | -    | -    | -   | -    |
| AF349453  | Claudin 8 (Cldn8)                                                   | -    | 8.1  | -    | -    | -   | -    |
| BB736632  | CLP1, cleavage and polyadenylation factor I subunit, homolog (Clp1) | -    | 2.7  | -    | -    | -   | -    |
| BQ173958  | Coagulation factor II (thrombin) receptor (F2r)                     | -    | 2.9  | -    | -    | -   | -    |
| BC024886  | Coagulation factor III (F3)                                         | -    | 2.8  | -    | -    | -   | -    |



|           |                                                                                               |      |      |      |      |     |     |
|-----------|-----------------------------------------------------------------------------------------------|------|------|------|------|-----|-----|
| NM_007972 | Coagulation factor X (F10)                                                                    | -    | -    | -    | 2.5  | -   | -   |
| NM_028784 | Coagulation factor XIII, A1 subunit (F13a1)                                                   | -    | 4.7  | -    | -    | -   | -   |
| BE653037  | Coatomer protein complex, subunit gamma 2, antisense 2 (Copg2as2)                             | -    | -    | -    | -2.5 | -   | -   |
| AK006551  | Coenzyme Q10 homolog B (Coq10b)                                                               | 2    | -    | -    | -    | -   | -   |
| AV108872  | Coiled-coil domain containing 117 (Ccdc117)                                                   | -    | 2.5  | -    | -    | -   | -   |
| AW060797  | Coiled-coil domain containing 85A (Ccdc85a)                                                   | -    | 3.5  | -    | -    | -   | -   |
| BM941868  | Colony stimulating factor 2 receptor, alpha, low-affinity (granulocyte-macrophage) (Csf2ra)   | -    | 2.8  | -    | -    | -   | -   |
| BB769628  | Colony stimulating factor 2 receptor, beta 1, low-affinity (granulocyte-macrophage) (Csf2rb1) | -    | 5    | -    | -    | -   | 2.4 |
| NM_007781 | Colony stimulating factor 2 receptor, beta 2, low-affinity (granulocyte-macrophage) (Csf2rb2) | -    | 3.5  | -    | -    | -   | -   |
| NM_009971 | Colony stimulating factor 3 (granulocyte) (Csf3)                                              | -    | 3.8  | -    | 2.1  | -   | -   |
| NM_009777 | Complement component 1, q subcomponent, beta polypeptide (C1qb)                               | -    | -    | -    | 2.4  | -   | -   |
| NM_008198 | Complement factor B (Cfb)                                                                     | -    | -    | -    | 2.5  | -   | -   |
| NM_010217 | Connective tissue growth factor (Ctgf)                                                        | 3.3  | 7.3  | -    | -    | -   | -   |
| AW548480  | Copine VIII (Cpne8)                                                                           | -    | 5.9  | -    | -    | -   | -   |
| BC002136  | Coronin, actin binding protein 1A (Coro1a)                                                    | -    | 3.5  | -    | -    | -   | -   |
| AV016515  | Crystallin, alpha B (Cryab)                                                                   | -    | 3.9  | -    | -    | -   | -   |
| NM_021352 | Crystallin, beta B3 (Crybb3)                                                                  | -    | 6.8  | -    | -    | -   | -   |
| NM_030004 | Crystallin, lambda 1 (Cry11)                                                                  | -    | -3   | -    | -    | -   | -   |
| BG072903  | C-terminal binding protein 2 (Ctbp2)                                                          | -    | 2.8  | -    | -    | -   | -   |
| BB231897  | CTTNBP2 N-terminal like (Ctnnbp2nl)                                                           | -    | 2.4  | -    | -    | -   | 2   |
| BB035924  | C-type lectin domain family 1, member a (Clec1a)                                              | -    | 2.7  | -    | -    | -   | -   |
| NM_010819 | C-type lectin domain family 4, member d (Clec4d)                                              | -    | 3.9  | -    | 3.6  | -   | -   |
| NM_019948 | C-type lectin domain family 4, member e (Clec4e)                                              | -    | 2.5  | -    | 2.3  | -   | 3.8 |
| AF240358  | C-type lectin domain family 4, member n (Clec4n)                                              | -    | 5    | -    | -    | -   | -   |
| NM_020008 | C-type lectin domain family 7, member a (Clec7a)                                              | -    | 3.2  | -    | -    | -   | -   |
| BB129488  | Cut-like 2 (Cutl2)                                                                            | -2.2 | -    | -    | -    | -   | -   |
| BB666837  | CWF19-like 1, cell cycle control (Cwf19l1)                                                    | -    | -2   | -    | -    | -   | -   |
| AK015150  | CXXC finger 5 (Cxxc5)                                                                         | -    | -2.1 | -    | -    | -   | -   |
| BB357590  | Cyclin D binding myb-like transcription factor 1 (Dmtf1)                                      | -    | -    | -    | -    | 2.7 | -   |
| BE685667  | Cyclin D3 (Ccnd3)                                                                             | -    | -    | -    | -    | 3.9 | -   |
| AK007630  | Cyclin-dependent kinase inhibitor 1A (P21) (Cdkn1a)                                           | -    | 8.2  | 2.3  | 5.2  | -   | -   |
| BC026595  | Cystathionine beta-synthase (Cbs)                                                             | -2.3 | -    | -    | -    | -   | -   |
| BF124540  | Cysteine and glycine-rich protein 1 (Csrp1)                                                   | -    | 2.6  | -    | -    | -   | -   |
| AK008165  | Cysteine conjugate-beta lyase 1 (Ccb11)                                                       | -    | -2.1 | -    | -    | -   | -   |
| BB533736  | Cysteine rich protein 61 (Cyr61)                                                              | -    | -    | -3.8 | -8   | -   | -   |

|           |                                                                     |     |       |     |      |   |     |
|-----------|---------------------------------------------------------------------|-----|-------|-----|------|---|-----|
| AK018666  | Cysteine rich transmembrane BMP regulator 1 (chordin like) (Crim1)  | -   | 2.1   | -   | -    | - | -   |
| BB558800  | Cysteine-rich secretory protein LCCL domain containing 2 (Crispld2) | -   | 3.5   | -   | -    | - | -   |
| NM_016748 | Cytidine 5'-triphosphate synthase (Ctps)                            | -   | 3.1   | -   | 2.2  | - | -   |
| AK008793  | Cytidine deaminase (Cda)                                            | -   | -2.8  | -   | -    | - | -   |
| AK018713  | Cytochrome b-245, alpha polypeptide (Cyba)                          | -   | 3.2   | -   | -    | - | -   |
| AV373944  | Cytochrome b-245, beta polypeptide (Cybb)                           | -   | 3.9   | -   | -    | - | -   |
| BC006732  | Cytochrome b-561 (Cyb561)                                           | -   | 10.4  | -   | -    | - | -   |
| NM_009998 | Cytochrome P450, 2b10, phenobarbital inducible, type b (Cyp2b10)    | 3.1 | -     | -   | -    | - | -   |
| NM_009992 | Cytochrome P450, family 1, subfamily a, polypeptide 1 (Cyp1a1)      | -   | -     | -   | -2.3 | - | -   |
| BI251808  | Cytochrome P450, family 1, subfamily b, polypeptide 1 (Cyp1b1)      | -   | -     | -   | -    | - | 2.2 |
| NM_007809 | Cytochrome P450, family 17, subfamily a, polypeptide 1 (Cyp17a1)    | 2.3 | -     | -   | -    | - | -   |
| NM_007812 | Cytochrome P450, family 2, subfamily a, polypeptide 4 (Cyp2a4)      | -   | -3.3  | -   | -    | - | -   |
| NM_007813 | Cytochrome P450, family 2, subfamily b, polypeptide 13 (Cyp2b13)    | -   | -11.1 | -   | -    | - | -   |
| AF047725  | Cytochrome P450, family 2, subfamily c, polypeptide 38 (Cyp2c38)    | -   | -2.3  | -   | -    | - | -   |
| BC025819  | Cytochrome P450, family 2, subfamily c, polypeptide 44 (Cyp2c44)    | -   | -2.7  | -   | -    | - | -   |
| AI256046  | Cytochrome P450, family 2, subfamily c, polypeptide 50 (Cyp2c50)    | -   | -2.9  | -   | -    | - | -   |
| NM_028089 | Cytochrome P450, family 2, subfamily c, polypeptide 55 (Cyp2c55)    | 2.9 | -     | -   | -    | - | -   |
| BF683039  | Cytochrome P450, family 2, subfamily d, polypeptide 22 (Cyp2d22)    | -   | -2.3  | -   | -    | - | -   |
| NM_013809 | Cytochrome P450, family 2, subfamily g, polypeptide 1 (Cyp2g1)      | -   | -3.3  | -   | -    | - | -   |
| NM_010001 | Cytochrome P450, family 2, subfamily c, polypeptide 37 (Cyp2c37)    | -   | -3.2  | -   | -    | - | -   |
| NM_007823 | Cytochrome P450, family 4, subfamily b, polypeptide 1 (Cyp4b1)      | -   | 3.2   | -   | -    | - | -   |
| BC011228  | Cytochrome P450, family 4, subfamily f, polypeptide 14 (Cyp4f14)    | -   | -4.5  | -   | -    | - | -   |
| NM_134127 | Cytochrome P450, family 4, subfamily f, polypeptide 15 (Cyp4f15)    | -   | -5.1  | -   | -    | - | -   |
| NM_007825 | Cytochrome P450, family 7, subfamily b, polypeptide 1 (Cyp7b1)      | -   | -     | 2.8 | -    | - | -   |
| BC010973  | Cytochrome P450, family 8, subfamily b, polypeptide 1 (Cyp8b1)      | -   | -7.6  | -   | -    | - | -   |
| NM_009895 | Cytokine inducible SH2-containing protein (Cish)                    | -   | 2.5   | -   | -    | - | -   |
| NM_007796 | Cytotoxic T lymphocyte-associated protein 2 alpha (Ctla2a)          | -   | 5.1   | -   | -    | - | -   |

|           |                                                            |      |      |      |      |   |   |
|-----------|------------------------------------------------------------|------|------|------|------|---|---|
| BG064656  | Cytotoxic T lymphocyte-associated protein 2 beta (Ctla2b)  | -    | 4.5  | -    | -    | - | - |
| BB550183  | D site albumin promoter binding protein (Dbp)              | -    | -    | -4.8 | -    | - | - |
| AV349520  | D-2-hydroxyglutarate dehydrogenase (D2hgdh)                | -    | -2.3 | -    | -    | - | - |
| AV214253  | DEAD (Asp-Glu-Ala-Asp) box polypeptide 39 (Ddx39)          | -    | 2.1  | -    | -    | - | - |
| BF715043  | Dedicator of cytokinesis 10 (Protein zizimin 3) (Dock10)   | -    | 2.5  | -    | -    | - | - |
| BB045510  | Dedicator of cytokinesis 4 (Dock4)                         | -    | -    | -    | -2.2 | - | - |
| NM_028785 | Dedicator of cytokinesis 8 (Dock8)                         | -    | -2.9 | -    | -    | - | - |
| NM_011303 | Dehydrogenase/reductase (SDR family) member 3 (Dhrs3)      | -    | -2.1 | -    | -    | - | - |
| AK009385  | Dehydrogenase/reductase (SDR family) member 7 (Dhrs7)      | -    | -2.1 | -    | -    | - | - |
| BB705351  | Deltex 3-like (Dtx3l)                                      | -    | -    | -    | 2.3  | - | - |
| NM_019957 | Deoxyribonuclease II beta (Dnase2b)                        | -    | -2.2 | -    | -    | - | - |
| AK014624  | DEP domain containing 6 (Depdc6)                           | -    | -2.2 | -    | -    | - | - |
| BI452905  | Dermokine (Dmkn)                                           | -    | 3.8  | -    | -    | - | - |
| AB072269  | Desmoglein 2 (Dsg2)                                        | -    | -2.5 | -    | -    | - | - |
| AV297961  | Desmoplakin (Dsp)                                          | -    | -2.8 | -    | -    | - | - |
| AV077160  | Development and differentiation enhancing factor 2 (Ddef2) | -2.1 | -    | -    | -    | - | - |
| NM_021428 | Dexamethasone-induced transcript (Dexi)                    | -    | -2.4 | -    | -    | - | - |
| BC012247  | Dicarbonyl L-xylulose reductase (Dcxr)                     | -    | -2.3 | -    | -    | - | - |
| AF021031  | DiGeorge syndrome critical region gene 6 (Dgcr6)           | -    | -2.6 | -    | -    | - | - |
| AK005050  | Dihydrodiol dehydrogenase (dimeric) (Dhdh)                 | -    | -3.4 | -    | -    | - | - |
| AW490997  | Dihydropyrimidinase (Dpys)                                 | -    | -4.1 | -    | -    | - | - |
| BQ174209  | Dihydropyrimidinase-like 2 (Dpysl2)                        | -    | 2.4  | -    | -    | - | - |
| BB770857  | Dimethylarginine dimethylaminohydrolase 1 (Ddah1)          | -    | -2.6 | -    | -    | - | - |
| AI647687  | Dipeptidase 1 (renal) (Dpep1)                              | -    | 3.4  | -    | -    | - | - |
| BB667346  | Dipeptidylpeptidase 9 (Dpp9)                               | -    | 2.1  | -    | -    | - | - |
| BB234940  | Discoidin domain receptor family, member 1 (Ddr1)          | -    | 8.6  | -    | -    | - | - |
| AF241240  | DNA cross-link repair 1A, PSO2 homolog (Dclre1a)           | 2.5  | -    | -    | -    | - | - |
| AK017926  | DNA-damage-inducible transcript 4 (Ddit4)                  | -    | 3.1  | -    | 3.6  | - | - |
| BM118858  | DnaJ (Hsp40) homolog, subfamily B, member 6 (Dnajb6)       | -    | 3.3  | -    | -    | - | - |
| NM_013760 | DnaJ (Hsp40) homolog, subfamily B, member 9 (Dnajb9)       | -    | 2    | -    | -    | - | - |
| NM_013888 | DnaJ (Hsp40) homolog, subfamily C, member 12 (Dnajc12)     | -    | 3.5  | -    | -    | - | - |
| AF071068  | Dopa decarboxylase (Ddc)                                   | -    | -6.8 | -    | -    | - | - |
| BM117900  | Double C2, beta (Doc2b)                                    | -    | -    | -    | 2.9  | - | - |
| BB326709  | Doublecortin and CaM kinase-like 3 (Dcamk13)               | -    | -2.4 | -    | -    | - | - |
| BQ174742  | Downstream neighbor of SON (Donson)                        | -    | 2.2  | -    | -    | - | - |

|           |                                                                                         |      |      |   |      |     |     |
|-----------|-----------------------------------------------------------------------------------------|------|------|---|------|-----|-----|
| NM_013642 | Dual specificity phosphatase 1 (Dusp1)                                                  | -    | -    | - | -    | -   | 2.1 |
| AK010883  | Duffy blood group, chemokine receptor (Darc)                                            | -    | -    | - | 2    | -   | -   |
| NM_011722 | Dynactin 6 (Dctn6)                                                                      | -    | -    | - | -    | 3.1 | -   |
| NM_133796 | Dynein light chain LC8-type 2 (Dylnl2)                                                  | -    | -2.3 | - | -    | -   | -   |
| BB723867  | Dysferlin (Dysf)                                                                        | -    | -    | - | -    | 2.1 | -   |
| BB151715  | E26 avian leukemia oncogene 1, 5' domain (Ets1)                                         | -    | 2    | - | -    | -   | -   |
| BC005486  | E26 avian leukemia oncogene 2, 3' domain (Ets2)                                         | -    | 4    | - | -    | -   | -   |
| NM_007921 | E74-like factor 3 (Eif3)                                                                | -    | 2.1  | - | -    | -   | -   |
| NM_007913 | Early growth response 1 (Egr1)                                                          | -5.2 | -    | - | -    | -   | -   |
| BM120053  | Ectodermal-neural cortex 1 (Enc1)                                                       | -    | 2.3  | - | -    | -   | 2.2 |
| BI151440  | Ectonucleoside triphosphate diphosphohydrolase 1 (Entpd1)                               | -    | 2.4  | - | -    | -   | -   |
| AV381133  | Ectonucleoside triphosphate diphosphohydrolase 7 (Entpd7)                               | -    | 2.3  | - | -    | -   | -   |
| AK008590  | Ectonucleoside triphosphate diphosphohydrolase 8 (Entpd8)                               | -    | -2.3 | - | -    | -   | -   |
| AV280361  | Ectonucleotide pyrophosphatase/phosphodiesterase 4 (Enpp4)                              | -    | 2.4  | - | -    | -   | -   |
| NM_019397 | EGF-like-domain, multiple 6 (Egfl6)                                                     | -    | 4.3  | - | -    | -   | -   |
| BC022961  | EGL nine homolog 3 (Egln3)                                                              | -    | -2.4 | - | -    | -   | -   |
| AV222756  | EH-domain containing 2 /// similar to EH-domain containing 2 (Ehd2)                     | -    | 2.2  | - | -    | -   | -   |
| NM_133838 | EH-domain containing 4 (Ehd4)                                                           | -    | 3.7  | - | -    | -   | -   |
| BC011218  | Elastase 1, pancreatic (Ela1)                                                           | -    | -3.9 | - | -    | -   | -   |
| BB811788  | Elastin microfibril interfacier 2 (Emilin2)                                             | -    | 2.7  | - | -    | -   | -   |
| NM_021292 | Ellis van Creveld gene homolog (Evc)                                                    | -    | -2.5 | - | -    | -   | -   |
| NM_019423 | Elongation of very long chain fatty acids (FEN1/Elo2, SUR4/Elo3, yeast)-like 2 (Elovl2) | -    | -2.2 | - | -    | -   | -   |
| BG064842  | Embigin (Emb)                                                                           | -    | 3.2  | - | -    | -   | -   |
| BQ044016  | Enabled homolog (Enah)                                                                  | -    | 3.2  | - | -    | -   | -   |
| AK013765  | Endothelial cell growth factor 1 (platelet-derived) (Ecgf1)                             | -2.5 | -2.6 | - | -    | -   | -   |
| AF361882  | Endothelial cell-specific adhesion molecule (Esam1)                                     | -    | 2.3  | - | -    | -   | -   |
| BC020038  | Endothelial cell-specific molecule 1 (Esm1)                                             | -    | -    | - | -3.3 | -   | -   |
| U81983    | Endothelial PAS domain protein 1 (Epas1)                                                | -    | 2.8  | - | -    | -   | -   |
| BC008277  | Endothelin receptor type A (Ednra)                                                      | -    | 2.4  | - | -    | -   | -   |
| NM_023737 | Enoyl-Coenzyme A, hydratase/3-hydroxyacyl Coenzyme A dehydrogenase (Ehhadh)             | -    | -2.6 | - | -    | -   | -   |
| AF306665  | Eosinophil-associated, ribonuclease A family, member 2 (Ear2)                           | -    | 17.3 | - | -    | -   | -   |
| NM_017388 | Eosinophil-associated, ribonuclease A family, member 3 (Ear3)                           | -    | 25.6 | - | -    | -   | -   |
| D38146    | Ephrin A1 (Efna1)                                                                       | -2.1 | -    | - | -    | -   | -   |
| U03425    | Epidermal growth factor receptor (Egfr)                                                 | -    | 5.1  | - | -    | -   | -   |
| U25633    | Epithelial membrane protein 1 (Emp1)                                                    | -    | 7.9  | - | -    | -   | -   |

|           |                                                               |    |      |   |     |     |     |
|-----------|---------------------------------------------------------------|----|------|---|-----|-----|-----|
| BE571790  | Epithelial membrane protein 2 (Emp2)                          | -  | 4.3  | - | -   | -   | -   |
| BC015076  | Epithelial V-like antigen 1 (Eva1)                            | -  | -2.1 | - | -   | -   | -   |
| NM_133753 | ERBB receptor feedback inhibitor 1 (Errf1)                    | -  | 2.8  | - | 2.2 | 3.9 | 5.6 |
| BM234652  | ERO1-like (Ero1l)                                             | -  | 2.4  | - | -   | -   | -   |
| NM_133660 | Esterase 22 (Es22)                                            | -  | -2.6 | - | -   | -   | -   |
| BC010592  | Ethylmalonic encephalopathy 1 (Ethe1)                         | -  | -5.1 | - | -   | -   | -   |
| BC006789  | Ets homologous factor (Ehf)                                   | -  | 2.2  | - | -   | -   | -   |
| BI456953  | Ets variant gene 3 (Etv3)                                     | -  | 2.1  | - | -   | -   | -   |
| BM200591  | Eukaryotic translation initiation factor 1A (Eif1a)           | -  | 2.3  | - | -   | -   | -   |
| AV124537  | Extra cellular link domain-containing 1 (Xlkd1)               | -  | 3.8  | - | -   | -   | -   |
| BG070740  | Far upstream element (FUSE) binding protein 1 (Fubp1)         | -  | 2    | - | -   | -   | -   |
| NM_007987 | Fas (TNF receptor superfamily member) (Fas)                   | -  | 2.1  | - | 2   | -   | -   |
| BB189927  | Fatty acid amide hydrolase (Faah)                             | -  | -2.6 | - | -   | -   | -   |
| BC002148  | Fatty acid binding protein 4, adipocyte (Fabp4)               | -  | 2.1  | - | -   | -   | -   |
| NM_019699 | Fatty acid desaturase 2 (Fadds2)                              | -  | -3   | - | -   | -   | -   |
| AV026617  | FBJ osteosarcoma oncogene (Fos)                               | -  | 3.5  | - | -   | -   | 2.1 |
| BG076338  | F-box protein 21 (Fbxo21)                                     | -2 | -    | - | -   | -   | -   |
| AK006369  | F-box protein 30 (Fbxo30)                                     | -  | 2.1  | - | -   | -   | -   |
| NM_133765 | F-box protein 31 (Fbxo31)                                     | -  | 2.7  | - | -   | -   | -   |
| BC027310  | Fc fragment of IgG, low affinity IIIa, receptor (Fcgr3a)      | -  | 2.1  | - | -   | -   | 3.1 |
| NM_010185 | Fc receptor, IgE, high affinity I, gamma polypeptide (Fcer1g) | -  | 2.3  | - | -   | -   | -   |
| NM_010188 | Fc receptor, IgG, low affinity III (Fcgr3)                    | -  | 2.1  | - | -   | -   | -   |
| NM_007993 | Fibrillin 1 (Fbn1)                                            | -  | 2.6  | - | -   | -   | -   |
| BC021946  | Fibrinogen-like protein 1 (Fgl1)                              | -  | 2.6  | - | -   | -   | -   |
| BF136544  | Fibrinogen-like protein 2 (Fgl2)                              | -  | 3.1  | - | -   | -   | -   |
| BM234360  | Fibronectin 1 (Fn1)                                           | -2 | -    | - | -   | -   | -   |
| BG064539  | Fibronectin type III domain containing 3B (Fn3b)              | -  | 2.6  | - | -   | -   | -   |
| AK013203  | Fibronectin type III domain containing 4 (Fn3c4)              | -  | -2   | - | -   | -   | -   |
| BG070068  | Filamin binding LIM protein 1 (Fblim1)                        | -  | 2.3  | - | -   | -   | -   |
| NM_024169 | FK506 binding protein 11 (Fkbp11)                             | -  | 3    | - | -   | -   | -   |
| BB027759  | FK506 binding protein 14 (Fkbp14)                             | -  | -    | - | 2.2 | -   | -   |
| BB456860  | FK506 binding protein 4 (Fkbp4)                               | -  | -2.7 | - | -   | -   | -   |
| U16959    | FK506 binding protein 5 (Fkbp5)                               | -  | 2.4  | 2 | 8.1 | -   | 2.4 |
| NM_008030 | Flavin containing monooxygenase 3 (Fmo3)                      | -  | -7.9 | - | -   | -   | -   |
| NM_008027 | Flotillin 1 (Flot1)                                           | -  | 2    | - | -   | -   | -   |
| BI452727  | Follistatin-like 1 (Fstl1)                                    | -  | 3    | - | -   | -   | -   |
| BB437522  | Forkhead box F1a (Foxf1a)                                     | -  | 2.4  | - | -   | -   | -   |
| BB364488  | Forkhead box O3a (Foxo3a)                                     | -  | -    | - | 2   | -   | -   |
| NM_080845 | Formiminotransferase cyclodeaminase (Ftcd)                    | -  | -2.1 | - | -   | -   | -   |
| AK017338  | Formin-like 2 (Fmnl2)                                         | -  | 2.9  | - | -   | -   | -   |
| NM_013521 | Formyl peptide receptor 1 (Fpr1)                              | -  | 2.8  | - | -   | -   | -   |

|           |                                                                                  |   |      |      |      |   |   |
|-----------|----------------------------------------------------------------------------------|---|------|------|------|---|---|
| NM_008039 | Formyl peptide receptor, related sequence 2 (Fpr-rs2)                            | - | 8.4  | -    | -    | - | - |
| BM245170  | Fos-like antigen 2 /// similar to fos-like antigen 2 (Fosl2)                     | - | 4.8  | -    | -    | - | - |
| AV345166  | Frizzled homolog 8 (Fzd8)                                                        | - | -2.7 | -    | -    | - | - |
| NM_022014 | Fructosamine 3 kinase (Fn3k)                                                     | - | -3.2 | -    | -    | - | - |
| BC026949  | Fumarylacetoacetate hydrolase domain containing 1 (Fahd1)                        | - | -2.7 | -    | -    | - | - |
| BB527078  | Furry homolog (Fry)                                                              | - | 2.5  | -    | -    | - | - |
| NM_030701 | G protein-coupled receptor 109A (Gpr109a)                                        | - | 4    | -    | -    | - | - |
| AW547876  | G protein-coupled receptor 116 (Gpr116)                                          | - | 4    | -    | -    | - | - |
| BB726971  | G protein-coupled receptor 137B (Gpr137b)                                        | - | 2.7  | -    | -    | - | - |
| BC018381  | G protein-coupled receptor 177 (Gpr177)                                          | - | 2.6  | -    | -    | - | - |
| BC019379  | G protein-coupled receptor kinase 5 (Gprk5)                                      | - | 2.4  | -    | -    | - | - |
| BG064659  | G protein-coupled receptor, family C, group 5, member A (Gprc5a)                 | - | 4.8  | -    | -    | - | - |
| BC008228  | G protein-coupled receptor, family C, group 5, member C (Gprc5c)                 | - | -2.3 | -    | -    | - | - |
| NM_008059 | G0/G1 switch gene 2 (G0s2)                                                       | - | -3.4 | -    | -    | - | - |
| AV307219  | Galactose mutarotase (Galm)                                                      | - | -3.2 | -    | -    | - | - |
| AF180518  | Gamma-aminobutyric acid (GABA(A)) receptor-associated protein-like 1 (Gabarapl1) | - | -2.5 | -    | -    | - | - |
| NM_010268 | Ganglioside-induced differentiation-associated-protein 10 (Gdap10)               | - | 4.3  | -    | 2.5  | - | - |
| M63801    | Gap junction membrane channel protein alpha 1 (Gja1)                             | - | 7.2  | -    | -    | - | - |
| AF216832  | Gap junction membrane channel protein alpha 4 (Gja4)                             | - | 2.7  | -    | -    | - | - |
| AV224521  | Gelsolin (Gsn)                                                                   | - | 24   | -    | -    | - | - |
| BB829808  | Gene model 1960 (Gm1960)                                                         | - | 28.9 | 35.3 | 15.9 | - | - |
| BB053232  | Gene model 944, (Gm944)                                                          | - | 2.2  | -    | -    | - | - |
| BG075741  | General transcription factor II A, 2 (Gtf2a2)                                    | - | 2.5  | -    | -    | - | - |
| BC016637  | General transcription factor IIB (Gtf2b)                                         | - | 2.1  | -    | -    | - | - |
| AV251087  | GLE1 RNA export mediator-like (Gle1l)                                            | - | 2.2  | -    | -    | - | - |
| BC025083  | GLI pathogenesis-related 1 (glioma) (Glipr1)                                     | - | 2.1  | -    | -    | - | - |
| BM208214  | GLI pathogenesis-related 2 (Glipr2)                                              | - | 2.3  | -    | -    | - | - |
| NM_022024 | Glia maturation factor, gamma (Gmfg)                                             | - | 2.1  | -    | -    | - | - |
| BC011139  | Glucokinase (Gck)                                                                | - | -2.4 | -    | -    | - | - |
| BC012412  | Glucokinase regulatory protein (Gckr)                                            | - | -2.9 | -    | -    | - | - |
| NM_011937 | Glucosamine-6-phosphate deaminase 1 (Gnpda1)                                     | - | -2.1 | -    | -    | - | - |
| NM_008105 | Glucosaminyl (N-acetyl) transferase 2, I-branching enzyme (Gcnt2)                | - | 2.7  | -    | -    | - | - |
| NM_008061 | Glucose-6-phosphatase, catalytic (G6pc)                                          | - | -8.5 | -    | -    | - | - |
| AA792094  | Glutamate oxaloacetate transaminase 1, soluble (Got1)                            | - | -2.7 | -    | -    | - | - |
| BC019374  | Glutamate-cysteine ligase, catalytic subunit (Gclc)                              | - | -2.3 | -    | -    | - | - |
| NM_008129 | Glutamate-cysteine ligase, modifier subunit (Gclm)                               | - | -    | 2.2  | -    | - | - |

|           |                                                                                                               |   |      |     |     |   |     |
|-----------|---------------------------------------------------------------------------------------------------------------|---|------|-----|-----|---|-----|
| AK008086  | Glutamic pyruvic transaminase 1, soluble (Gpt1)                                                               | - | -2.9 | -   | -   | - | -   |
| BE373308  | Glutaminase (Gls)                                                                                             | - | 3.7  | -   | -   | - | -   |
| AI195532  | Glutaminase 2 (liver, mitochondrial) (Gls2)                                                                   | - | -2.9 | -   | -   | - | -   |
| AF334736  | Glutamine fructose-6-phosphate transaminase 1 (Gfpt1)                                                         | - | 2.1  | -   | -   | - | -   |
| NM_008161 | Glutathione peroxidase 3 (Gpx3)                                                                               | - | 12.4 | -   | -   | - | -   |
| NM_010362 | Glutathione S-transferase omega 1 (Gsto1)                                                                     | - | -2.1 | -   | -   | - | -   |
| NM_008182 | Glutathione S-transferase, alpha 2 (Yc2) (Gsta2)                                                              | - | -    | 3.6 | -   | - | -   |
| AI172943  | Glutathione S-transferase, alpha 3 (Gsta3)                                                                    | - | -3.8 | -   | -   | - | -   |
| NM_010357 | Glutathione S-transferase, alpha 4 (Gsta4)                                                                    | - | -2.1 | -   | -   | - | -   |
| AF464943  | Glutathione S-transferase, mu 4 (Gstm4)                                                                       | - | -3.7 | -   | -   | - | -   |
| NM_026672 | Glutathione S-transferase, mu 7 (Gstm7)                                                                       | - | -2.4 | -   | -   | - | -   |
| NM_008149 | Glycerol-3-phosphate acyltransferase, mitochondrial (Gpam)                                                    | - | -2.3 | -   | -   | - | -   |
| BC019391  | Glycerol-3-phosphate dehydrogenase 1 (soluble) (Gpd1)                                                         | - | -3.1 | -   | -   | - | -   |
| BB727537  | Glycerol-3-phosphate dehydrogenase 1-like (Gpd1l)                                                             | - | -2.4 | -   | -   | - | -   |
| BC021322  | Glycogen synthase 2 (Gys2)                                                                                    | 2 | -3.2 | -   | -   | - | -   |
| NM_013755 | Glycogenin Ggyg)                                                                                              | - | 2.4  | -   | -   | - | -   |
| U05264    | Glycoprotein 49 A (Gp49a); also called leukocyte immunoglobulin-like receptor, subfamily B, member 4 (Lilrb4) | - | 5    | -   | -   | - | 2.9 |
| AF297615  | Glycoprotein galactosyltransferase alpha 1, 3 (Ggta1)                                                         | - | 2.6  | -   | -   | - | -   |
| BF449735  | Glycoprotein m6a (Gpm6a)                                                                                      | - | 3    | -   | -   | - | -   |
| AK016567  | Glycoprotein m6b (Gpm6b)                                                                                      | - | 6.7  | -   | -   | - | -   |
| NM_008156 | Glycosylphosphatidylinositol specific phospholipase D1 (Gpld1)                                                | - | -2.6 | -   | -   | - | -   |
| BC004651  | GM2 ganglioside activator protein (Gm2a)                                                                      | - | -2   | -   | -   | - | -   |
| D78270    | Golgi autoantigen, golgin subfamily a, 3 (Golga3)                                                             | - | 2    | -   | -   | - | -   |
| BC021450  | Grancalcin (Gca)                                                                                              | - | 2    | -   | -   | - | -   |
| AI323528  | Growth arrest and DNA-damage-inducible 45 beta (Gadd45b)                                                      | - | 4.4  | -   | 2.1 | - | -   |
| AK007410  | Growth arrest and DNA-damage-inducible 45 gamma (Gadd45g)                                                     | - | 8.3  | -   | -   | - | -   |
| BB550400  | Growth arrest specific 1 (Gas1)                                                                               | - | -3.9 | -   | -   | - | -   |
| BI650268  | Growth arrest specific 5 (Gas5)                                                                               | - | 2.9  | -   | -   | - | -   |
| NM_019521 | Growth arrest specific 6 (Gas6)                                                                               | - | 2.4  | -   | -   | - | -   |
| AW049055  | Growth factor receptor bound protein 2-associated protein 2 (Gab2)                                            | - | 2.9  | -   | -   | - | -   |
| NM_010346 | Growth factor receptor bound protein 7 (Grb7)                                                                 | - | -3.2 | -   | -   | - | -   |
| NM_010284 | Growth hormone receptor (Ghr)                                                                                 | - | -2.1 | -   | -   | - | -   |
| U10551    | GTP binding protein (gene overexpressed in skeletal muscle) (Gem)                                             | - | 2.9  | -   | -   | - | -   |
| BC005577  | GTPase, IMAP family member 4 (Gimap4)                                                                         | - | 2.1  | -   | -   | - | -   |

|           |                                                                        |   |      |     |     |     |     |
|-----------|------------------------------------------------------------------------|---|------|-----|-----|-----|-----|
| BM243571  | GTPase, very large interferon inducible 1 (Gvin1)                      | - | 12.6 | -   | -   | -   | -   |
| AF015887  | Guanidinoacetate methyltransferase (Gamt)                              | - | -4   | -   | -   | -   | -   |
| AV021455  | Guanine nucleotide binding protein (G protein), gamma 2 subunit (Gng2) | - | 2.2  | -   | -   | -   | -   |
| BC022793  | Guanine nucleotide binding protein, alpha inhibiting 1 (Gnai1)         | - | 2.2  | -   | -   | -   | -   |
| BM199850  | Guanine nucleotide binding protein-like 2 (nucleolar) (Gnl2)           | - | 2.4  | -   | -   | -   | -   |
| BF021177  | Guanine nucleotide binding protein-like 3 (nucleolar) (Gnl3)           | - | 2.2  | -   | -   | -   | -   |
| BC010229  | Guanylate binding protein 6 (Gbp6)                                     | - | 4    | -   | 4.3 | -   | 3   |
| BE197524  | Guanylate nucleotide binding protein 2 (Gbp2)                          | - | 22.4 | -   | 4.6 | -   | 5.5 |
| NM_018734 | Guanylate nucleotide binding protein 3 (Gbp3)                          | - | 11.1 | -   | 4.2 | -   | 2.7 |
| BC019856  | Gulonolactone (L-) oxidase (Gulo)                                      | - | -2.8 | -   | -   | -   | -   |
| AI326893  | Hairy and enhancer of split 6 (Hes6)                                   | - | -2.3 | -   | -   | -   | -   |
| AF247040  | Hairy and enhancer of split 6 (Hes6)                                   | - | -2.3 | -   | -   | -   | -   |
| BC003491  | Haloacid dehalogenase-like hydrolase domain containing 3 (Hdhd3)       | - | -3.1 | -   | -   | -   | -   |
| U03561    | Heat shock protein 1 (Hspb1)                                           | - | 3.6  | -   | -   | -   | -   |
| AW763765  | Heat shock protein 1A (Hspa1a)                                         | - | -    | 2.9 | -   | -   | -   |
| M12573    | Heat shock protein 1B (Hspa1b)                                         | - | -    | -   | -   | 2.2 | -   |
| AK015214  | Hect domain and RLD 5 (Herc5)                                          | - | 4.1  | -   | -   | -   | -   |
| BI251153  | Helicase with zinc finger domain (Helz)                                | - | -    | -   | -   | 2.1 | -   |
| NM_008225 | Hematopoietic cell specific Lyn substrate 1 (Hcls1)                    | - | 2.2  | -   | -   | -   | -   |
| AK009239  | HemK methyltransferase family member 1 (Hemk1)                         | - | -2.2 | -   | -   | -   | -   |
| AK009636  | Hemochromatosis type 2 (juvenile) (Hfe2)                               | - | -5.3 | -   | -   | -   | -   |
| BC011246  | Hemopexin (Hpxn)                                                       | - | -    | 5.4 | 2.3 | -   | -   |
| NM_010407 | Hemopoietic cell kinase (Hck)                                          | - | 4    | -   | -   | -   | -   |
| AV378394  | Hepatoma-derived growth factor, related protein 3 (Hdgfrp3)            | - | 2.4  | -   | -   | -   | -   |
| BB713410  | Hexokinase 1 (Hk1)                                                     | - | 2.4  | -   | -   | -   | -   |
| X67668    | High mobility group box 2 (Hmgb2)                                      | - | 2    | -   | -   | -   | -   |
| AW555814  | Histidine acid phosphatase domain containing 1 (Hisppd1)               | - | 2.1  | -   | -   | -   | -   |
| L07645    | Histidine ammonia lyase (Hal)                                          | - | -2.6 | -   | -   | -   | -   |
| BG072171  | Histidine decarboxylase (Hdc)                                          | - | 7.9  | -   | -   | -   | -   |
| M15848    | Histocompatibility 2, class II antigen A, beta 1 (H2-Ab1)              | - | 2.6  | -   | -   | -   | -   |
| NM_010382 | Histocompatibility 2, class II antigen E beta (H2-Eb1)                 | - | 3.1  | -   | -   | -   | -   |
| NM_010386 | Histocompatibility 2, class II, locus Dma (H2-Dma)                     | - | 2.5  | -   | -   | -   | -   |
| NM_010388 | Histocompatibility 2, class II, locus Mb1 (H2-DMb1)                    | - | 2.2  | -   | -   | -   | -   |
| M33151    | Histocompatibility 2, D region locus 1 (H2-D1)                         | - | 2.3  | -   | -   | -   | -   |



|           |                                                                                                          |      |      |   |      |      |      |
|-----------|----------------------------------------------------------------------------------------------------------|------|------|---|------|------|------|
| BC018402  | Histocompatibility 2, K1, K region (H2-K1)                                                               | -    | 3    | - | -    | -    | -    |
| BC010602  | Histocompatibility 2, Q region locus 1 (H2-Q1)                                                           | -    | 2.7  | - | -    | -    | -    |
| AV127319  | Histone cluster 2, H2be (Hist2h2be)                                                                      | -    | -2.4 | - | -    | -    | -    |
| BB183559  | Histone deacetylase 11 (Hdac11)                                                                          | -    | -2.5 | - | -    | -    | -    |
| BB130716  | HIV-1 Rev binding protein (Hrb)                                                                          | -    | 2.2  | - | -    | -    | -    |
| BB243375  | HIV-1 Rev binding protein-like (Hrbl)                                                                    | -    | -2.2 | - | -    | -    | -    |
| BC024546  | Homeobox only domain (Hod)                                                                               | -    | 2.8  | - | -    | -    | -    |
| AB017136  | Homer homolog 2 (Homer2)                                                                                 | -    | -2.8 | - | -    | -    | -    |
| NM_022331 | Homocysteine-inducible, endoplasmic reticulum stress-inducible, ubiquitin-like domain member 1 (Herpud1) | -    | 2.2  | - | -    | -    | -    |
| AK002584  | Homogentisate 1, 2-dioxygenase (Hgd)                                                                     | -    | -4   | - | -    | -    | -    |
| BF580567  | Host cell factor C1 regulator 1 (XPO1-dependent) (Hcfc1r1)                                               | -    | -2   | - | -    | -    | -    |
| NM_010437 | Human immunodeficiency virus type I enhancer binding protein 2 (Hivep2)                                  | -    | 2.9  | - | -    | -    | -    |
| BB164127  | Human immunodeficiency virus type I enhancer binding protein 3 (Hivep3)                                  | -    | 5.5  | - | -    | -    | -    |
| AF079222  | Hyaluronan mediated motility receptor (RHAMM) (Hmnr)                                                     | -    | -    | - | -    | -2.1 | -    |
| BC026757  | Hydroxy-delta-5-steroid dehydrogenase, 3 beta- and steroid delta-isomerase 2 (Hsd3b2)                    | -    | -4.9 | - | -    | -    | -    |
| M77015    | Hydroxy-delta-5-steroid dehydrogenase, 3 beta- and steroid delta-isomerase 3 (Hsd3b3)                    | -    | -3.9 | - | -    | -    | -    |
| BC024619  | Hydroxypyruvate isomerase homolog (Hyi)                                                                  | -    | -2.3 | - | -    | -    | -    |
| BB546344  | Hydroxysteroid (17-beta) dehydrogenase 11 (Hsd17b11)                                                     | -    | -2   | - | -    | -    | -    |
| BC012682  | Hydroxysteroid (17-beta) dehydrogenase 2 (Hsd17b2)                                                       | -    | -2   | - | -    | -    | -    |
| X95580    | Hypoxia inducible factor 1, alpha subunit (Hif1a)                                                        | -    | 2.5  | - | -    | -    | -    |
| AK015966  | IBR domain containing 3 (Ibrdc3)                                                                         | -    | 2.2  | - | 2    | -    | -    |
| AK009564  | IKAROS family zinc finger 5 (Ikzf5)                                                                      | -    | 2.5  | - | -    | -    | -    |
| NM_133662 | Immediate early response 3 (Ier3)                                                                        | -    | 13.1 | - | -    | -    | -    |
| BF147705  | Immediate early response 5 (Ier5)                                                                        | -    | 3.5  | - | -    | -    | -    |
| NM_008326 | Immunity-related GTPase family, M (Irgm)                                                                 | -    | 2.8  | - | 4.2  | -    | -    |
| BC018365  | Immunoglobulin heavy chain 6 (heavy chain of IgM) (Igh-6)                                                | -    | -    | - | -    | 51.4 | 31.9 |
| AK008551  | Immunoglobulin lambda chain, variable 1 (Igl-V1)                                                         | -    | -    | - | -2.2 | -    | -    |
| NM_030691 | Immunoglobulin superfamily, member 6 (Igsf6)                                                             | -    | 3.1  | - | 2.8  | -    | -    |
| L38281    | Immunoresponsive gene 1 (Irg1)                                                                           | -    | 8.7  | - | 10.9 | -    | -    |
| NM_008324 | Indoleamine-pyrrole 2,3 dioxygenase (Indo)                                                               | -    | 3.3  | - | 6.4  | -    | -    |
| BC026393  | Indoleamine-pyrrole 2,3 dioxygenase-like 1 (Indol1)                                                      | -    | -2.3 | - | -    | -    | -    |
| BB253137  | Inhibin beta-B (Inhbb)                                                                                   | -    | 4.6  | - | -    | -    | -    |
| AK013239  | Inhibitor of DNA binding 2 (Id2)                                                                         | -3.8 | -    | - | -    | 2.1  | 2.3  |

|           |                                                                          |   |      |     |     |   |     |
|-----------|--------------------------------------------------------------------------|---|------|-----|-----|---|-----|
| NM_019777 | Inhibitor of kappaB kinase epsilon (Ikbke)                               | - | 2.8  | -   | -   | - | -   |
| BB081797  | Inositol polyphosphate multikinase (Ipmk)                                | - | -2.1 | -   | -   | - | -   |
| BB345784  | Insulin receptor substrate 1 (Irs1)                                      | - | -2.6 | -   | -   | - | -   |
| NM_008341 | Insulin-like growth factor binding protein 1 (Igfbp1)                    | - | 3.7  | -   | -   | - | -   |
| NM_008344 | Insulin-like growth factor binding protein 6 (Igfbp6)                    | - | 3.2  | -   | -   | - | -   |
| NM_008340 | Insulin-like growth factor binding protein, acid labile subunit (Igfals) | - | -7.4 | -   | -   | - | -   |
| AV251853  | Integrin alpha FG-GAP repeat containing 3 (Itfg3)                        | - | -2.2 | -   | -   | - | -   |
| NM_021334 | Integrin alpha X (Itgax)                                                 | - | 2.3  | -   | -   | - | -   |
| BB443308  | Integrin beta 1 (fibronectin receptor beta) (Itgb1)                      | - | 3.8  | -   | -   | - | -   |
| NM_008404 | Integrin beta 2 (Itgb2)                                                  | - | 3.3  | -   | -   | - | -   |
| NM_021359 | Integrin beta 6 (Itgb6)                                                  | - | 2.2  | -   | -   | - | -   |
| AK004893  | Inter alpha-trypsin inhibitor, heavy chain 4 (Itih4)                     | - | -    | 2.7 | -   | - | -   |
| BC008626  | Intercellular adhesion molecule (Icam1)                                  | - | 12.1 | -   | -   | - | -   |
| NM_010494 | Intercellular adhesion molecule 2 (Icam2)                                | - | 2.6  | -   | -   | - | -   |
| BB522265  | Interferon (alpha and beta) receptor 2 (Ifnar2)                          | - | 2.8  | -   | -   | - | -   |
| NM_011940 | Interferon activated gene 202B (Ifi202b)                                 | - | 7.4  | -   | 2.9 | - | 3.5 |
| BC008167  | Interferon activated gene 203 (Ifi203)                                   | - | 3.5  | -   | -   | - | -   |
| K00083    | Interferon gamma (Ifng)                                                  | - | 4.2  | -   | 4.3 | - | 5.4 |
| NM_018738 | Interferon gamma induced GTPase (Igtg)                                   | - | 4    | -   | 7.8 | - | 2.4 |
| NM_008330 | Interferon gamma inducible protein 47 (Ifi47)                            | - | 6    | -   | 4.2 | - | -   |
| BC027285  | Interferon induced transmembrane protein 1 (Ifitm1)                      | - | 3.3  | -   | 2   | - | 3.1 |
| BB193024  | Interferon induced transmembrane protein 6 (Ifitm)                       | - | -    | -   | 4.4 | - | -   |
| BM239828  | Interferon inducible GTPase 1 (Iigp1)                                    | - | 2    | -   | 7.3 | - | 6.5 |
| NM_019440 | Interferon inducible GTPase 2 (Iigp2)                                    | - | 3.8  | -   | 5.4 | - | 2.3 |
| NM_008390 | Interferon regulatory factor 1 (Irf1)                                    | - | 3.3  | -   | 3.6 | - | -   |
| NM_016851 | Interferon regulatory factor 6 (Irf6)                                    | - | -2.4 | -   | -   | - | -   |
| BG069095  | Interferon regulatory factor 8 (Irf8)                                    | - | 3.6  | -   | -   | - | -   |
| NM_008332 | Interferon-induced protein with tetratricopeptide repeats 2 (Ifit2)      | - | 3.4  | -   | -   | - | -   |
| NM_013562 | Interferon-related developmental regulator 1 (Ifrd1)                     | - | 4.9  | -   | -   | - | -   |
| BC022751  | Interferon-stimulated protein (Isg20)                                    | - | 4.4  | -   | -   | - | -   |
| BC003727  | Interleukin 1 alpha (IL1a)                                               | - | 3.1  | -   | -   | - | -   |
| BC011437  | Interleukin 1 beta (IL-1b)                                               | - | 7.2  | -   | 7.1 | - | 2.5 |
| NM_031167 | Interleukin 1 receptor antagonist (IL1rn)                                | - | 8.1  | -   | -   | - | -   |
| M57525    | Interleukin 1 receptor antagonist (Ilrn1)                                | - | 5.4  | -   | 3.8 | - | -   |
| NM_008362 | Interleukin 1 receptor, type I (IL1r1)                                   | - | 10.4 | -   | -   | - | -   |
| NM_010555 | Interleukin 1 receptor, type II (IL-1r2)                                 | - | 3.7  | -   | 5.2 | - | 4.2 |
| AF128214  | Interleukin 12b (IL12b)                                                  | - | 2.3  | -   | -   | - | -   |
| AK010040  | Interleukin 17 receptor A (IL17ra)                                       | - | 2.6  | -   | -   | - | -   |
| AF110803  | Interleukin 18 binding protein (Il18bp)                                  | - | -    | -   | 2.7 | - | -   |
| NM_008365 | Interleukin 18 receptor 1 (IL18r1)                                       | - | 5.1  | -   | -   | - | -   |

|           |                                                              |     |      |     |      |     |     |
|-----------|--------------------------------------------------------------|-----|------|-----|------|-----|-----|
| L20048    | Interleukin 2 receptor, gamma chain (IL2rg)                  | -   | 2.9  | -   | -    | -   | -   |
| NM_133775 | Interleukin 33 (IL33)                                        | -   | 5.8  | -   | -    | -   | -   |
| NM_010557 | Interleukin 4 receptor, alpha (IL4ra)                        | -   | 2    | -   | -    | -   | -   |
| NM_031168 | Interleukin 6 (IL-6)                                         | -   | 51.6 | 3.8 | 34.3 | -   | -   |
| AK017211  | Interleukin 6 signal transducer (IL6st)                      | -   | 2.3  | -   | -    | -   | -   |
| AI573431  | Interleukin 7 receptor (IL7r)                                | -   | -    | -   | -    | 2.2 | -   |
| NM_009909 | Interleukin 8 receptor beta (ILRB)                           | -   | -    | -   | 2.9  | -   | -   |
| AV228493  | Interleukin-1 receptor-associated kinase 3 (Irak3)           | -   | 9    | -   | -    | -   | -   |
| NM_016721 | IQ motif containing GTPase activating protein 1 (Iqgap1)     | -   | 4    | -   | -    | -   | -   |
| AF165984  | Iroquois related homeobox 1 (Irx1)                           | -   | 2    | -   | -    | -   | -   |
| NM_008393 | Iroquois related homeobox 3 (Irx3)                           | -   | 4.2  | -   | -    | -   | -   |
| AV221988  | Isovaleryl coenzyme A dehydrogenase (Ivd)                    | -   | -2   | -   | -    | -   | -   |
| AV293164  | Jumonji domain containing 1C (Jmjd1)                         | -   | 2.3  | -   | -    | -   | -   |
| BG228765  | Jumonji domain containing 3 (Jmjd3)                          | -   | -    | -   | -    | 2.2 | -   |
| NM_010591 | Jun oncogene (Jun)                                           | -   | 9.4  | -   | -    | -   | -   |
| NM_008416 | Jun-B oncogene (Junb)                                        | -   | 5.1  | -   | -    | -   | -   |
| BC026555  | Kallikrein B, plasma 1 (Klkb1)                               | -   | -4.2 | -   | -    | -   | -   |
| BB469300  | Kelch repeat and BTB (POZ) domain containing 8 (Kbtbd8)      | -   | 2.4  | -   | -    | -   | -   |
| BB428573  | Kelch-like 2, Mayven (Kihl2)                                 | -   | 2.7  | -   | -    | -   | 2.9 |
| BM124262  | Kelch-like 24 (Kihl24)                                       | -   | -    | -   | -    | 2.1 | -   |
| NM_008469 | Keratin 15 (Krt15)                                           | -   | -    | -   | -2.1 | -   | -   |
| NM_008471 | Keratin 19 (Krt19)                                           | -   | 2.6  | -   | -    | -   | -   |
| BC010337  | Keratin 7 (Krt7)                                             | -   | 6.6  | -   | -    | -   | -   |
| NM_028770 | Keratin 80 (Krt80)                                           | -   | 2.2  | -   | -    | -   | -   |
| NM_029550 | Kidney expressed gene 1 (Keg1)                               | -   | -6.7 | -   | -    | -   | -   |
| BB342219  | Kinesin family member 21A                                    | -   | 2.2  | -   | -    | -   | -   |
| BI328541  | Kinesin family member 5B                                     | -   | 2    | -   | -    | -   | -   |
| BB815530  | Kit ligand                                                   | -   | 3.9  | -   | -    | -   | -   |
| X65997    | Kit oncogene                                                 | -   | 2.6  | -   | -    | -   | -   |
| NM_031180 | Klotho beta                                                  | -   | -2.6 | -   | -    | -   | -   |
| BC013486  | Kruppel-like factor 15 (Klf15)                               | -   | -    | -   | 2.4  | -   | -   |
| NM_008452 | Kruppel-like factor 2 (lung) (Kif21a)                        | -   | 2.8  | -   | -    | -   | -   |
| BG069413  | Kruppel-like factor 4 (gut) (Kif4)                           | -   | 6.7  | -   | -    | -   | -   |
| BI465857  | Kruppel-like factor 5 (Kif5)                                 | -   | 2.6  | -   | -    | -   | -   |
| AV025472  | Kruppel-like factor 6 (Kif6)                                 | -   | 4.4  | -   | -    | -   | -   |
| BB524597  | Kruppel-like factor 7 (ubiquitous) (Kif7)                    | -   | 2.2  | -   | -    | -   | -   |
| NM_010699 | Lactate dehydrogenase A (Ldha)                               | -   | 2    | -   | -    | -   | -   |
| AV219418  | Lactate dehydrogenase B (Ldha)                               | -   | 2.4  | -   | -    | -   | -   |
| NM_008522 | Lactotransferrin (Ltf)                                       | -   | 3    | -   | -    | -   | -   |
| C77434    | Lanosterol synthase (Lss)                                    | 2.1 | -    | -   | -    | -   | -   |
| AV271979  | Large tumor suppressor 2 (Lats2)                             | -   | 2.2  | -   | -    | -   | -   |
| X16834    | Lectin, galactose binding, soluble 3 (Lgals3)                | -   | 4.4  | -   | -    | -   | -   |
| BC011507  | Lectin, galactose binding, soluble 7 (Lgals7)                | -   | 2.4  | -   | -    | -   | -   |
| BE283629  | Leprecan 1 (Lepre1)                                          | -   | 2.1  | -   | -    | -   | -   |
| BM124366  | Leptin receptor (Lepr)                                       | -   | -    | -   | -    | 2.1 | -   |
| BG069059  | Leucine rich repeat (in FLII) interacting protein 1 (Lrrfp1) | -   | 2.3  | -   | -    | -   | -   |

|                 |                                                                              |     |            |     |     |   |     |
|-----------------|------------------------------------------------------------------------------|-----|------------|-----|-----|---|-----|
| AI413999        | Leucine rich repeat containing 3 (Lrrc3)                                     | -   | -2.4       | -   | -   | - | -   |
| AW476171        | Leucine rich repeat containing 59 (Lrrc59)                                   | -   | 2.4        | -   | -   | - | -   |
| NM_029796       | Leucine-rich alpha-2-glycoprotein 1 (Lrg1)                                   | -   | 3.2        | -   | -   | - | -   |
| AK014938        | Leucine-rich repeat kinase 2 (Lrrk2)                                         | -   | 2.6        | -   | -   | - | -   |
| AV359781        | Leucine-rich repeats and transmembrane domains 1 (Lrtm1)                     | -   | -3.6       | -   | -   | - | -   |
| NM_010701       | Leukocyte cell derived chemotaxin 1 (Lect1)                                  | -   | -2.3       | -   | -   | - | -   |
| NM_010702       | Leukocyte cell-derived chemotaxin 2 (Lect2)                                  | -   | -3.7       | -   | -   | - | -   |
| BM231903        | LIM domain only 7 (Lmo7)                                                     | -   | 2.8        | -   | -   | - | -   |
| AV281676        | Lin-7 homolog A (Lin7a)                                                      | -   | -2.6       | -   | -   | - | -   |
| BC020991        | Lipase, endothelial (Lipg)                                                   | -   | -          | -   | -   | - | 3.7 |
| BB367422        | Lipase, member H (Liph)                                                      | -   | 2.7        | -   | -   | - | -   |
| AK014526        | Lipin 1 (Lpin1)                                                              | -   | 2.3        | -   | -   | - | -   |
| X14607          | Lipocalin 2 (Lcn2)                                                           | 6.5 | 67.3       | 5.7 | 6   | - | -   |
| AV149705        | Lipoma HMGIC fusion partner (Lhfp)                                           | -   | 2.4        | -   | -   | - | -   |
| <b>AW208574</b> | <b>Lipopolysaccharide binding protein (Lbp)</b>                              | -   | <b>4.2</b> | -   | -   | - | -   |
| AK017272        | Lipoprotein lipase (Lpl)                                                     | -   | 2.9        | -   | -   | - | -   |
| NM_133198       | Liver glycogen phosphorylase (Pygl)                                          | -   | -2.2       | -   | -   | - | -   |
| BQ176664        | Longevity assurance homolog 6 (Lass6)                                        | -   | 3.4        | -   | -   | - | -   |
| BC004727        | Loss of heterozygosity, 11, chromosomal region 2, gene A homolog (Loh11cr2a) | -   | 2.2        | -   | -   | - | -   |
| AV360881        | LPS-induced TN factor (Litaf)                                                | -   | 2.6        | -   | -   | - | -   |
| BI662680        | LSM14 homolog A (Lsm14a)                                                     | -   | 2          | -   | -   | - | -   |
| AV309996        | Luc7 homolog (S. cerevisiae)-like (Luc7I)                                    | -   | -          | -   | -   | 2 | -   |
| BG070818        | LUC7-like 2 (Luc7I2)                                                         | -   | 2.2        | -   | -   | - | -   |
| BC002070        | Lymphocyte antigen 6 complex, locus A (Ly6a)                                 | -   | 6          | -   | -   | - | -   |
| NM_010741       | Lymphocyte antigen 6 complex, locus C (Ly6c)                                 | -   | 13.1       | -   | 2.7 | - | -   |
| AF232024        | Lymphocyte antigen 6 complex, locus I (Ly6i)                                 | -   | 2.9        | -   | 2.6 | - | -   |
| NM_008879       | Lymphocyte cytosolic protein 1 (Lcp1)                                        | -   | 3          | -   | -   | - | -   |
| BC006948        | Lymphocyte cytosolic protein 2 (Lcp2)                                        | -   | 2.8        | -   | -   | - | -   |
| BB667084        | LysM, putative peptidoglycan-binding, domain containing 3 (Lysmd3)           | -   | 3.2        | -   | -   | - | -   |
| BE987427        | Lysophosphatidylglycerol acyltransferase 1 (Lpgat1)                          | -   | 2.7        | -   | -   | - | -   |
| AI596237        | Lysosomal acid lipase 1 (Lio1)                                               | -   | -2.3       | -   | -   | - | -   |
| AW208566        | Lysozyme (Lyzs)                                                              | -   | 5.9        | -   | -   | - | -   |
| M65143          | Lysyl oxidase (Lox)                                                          | -   | 5.9        | -   | 2.8 | - | -   |
| AF357006        | Lysyl oxidase-like 1 (Loxl1)                                                 | -   | 2.9        | -   | -   | - | -   |
| BG092512        | Macrophage activation 2 like (Mpa2l)                                         | -   | 6.1        | -   | 7.9 | - | 5.1 |
| L20315          | Macrophage expressed gene 1 (Mpeg1)                                          | -   | 2.3        | -   | -   | - | -   |
| NM_010766       | Macrophage receptor with collagenous structure (Marco)                       | -   | 5.4        | -   | -   | - | -   |
| NM_010760       | Mago-nashi homolog, proliferation-associated (Magoh)                         | -   | 2          | -   | -   | - | -   |
| AK006096        | Major facilitator superfamily domain containing 2 (Mfsd2)                    | 2.8 | 2.6        | -   | -   | - | -   |
| NM_080638       | Major vault protein (Mvp)                                                    | -   | 2.7        | -   | -   | - | -   |
| BG094874        | Male sterility domain containing 2 (Mlst2)                                   | -   | 2.3        | -   | -   | - | -   |

|           |                                                                                                                                              |   |      |     |      |   |     |
|-----------|----------------------------------------------------------------------------------------------------------------------------------------------|---|------|-----|------|---|-----|
| NM_010807 | MARCKS-like 1 (Marcks1)                                                                                                                      | - | 2.2  | -   | 2.7  | - | -   |
| AY042192  | MAS-related GPR, member A2 (Mrgpra2)                                                                                                         | - | -    | -   | 2.5  | - | -   |
| NM_008597 | Matrix Gla protein (Mgp)                                                                                                                     | - | 7.9  | -   | -    | - | -   |
| AF153199  | Matrix metalloproteinase 19 (Mmp19)                                                                                                          | - | -2.1 | -   | -    | - | -   |
| BF147716  | Matrix metalloproteinase 2 (Mmp2)                                                                                                            | - | 2.3  | -   | -    | - | -   |
| NM_010809 | Matrix metalloproteinase 3 (Mmp3)                                                                                                            | - | 2.5  | -   | -    | - | -   |
| NM_008611 | Matrix metalloproteinase 8 (Mmp8)                                                                                                            | - | 4.5  | -   | 5.6  | - | -   |
| AV228517  | MAX dimerization protein 1 (Mxd1)                                                                                                            | - | 3.2  | -   | 2.4  | - | -   |
| AV293368  | Mcf.2 transforming sequence-like (Mcf2l)                                                                                                     | - | 2.8  | -   | -    | - | -   |
| NM_019453 | Mediterranean fever (Mefv)                                                                                                                   | - | 2.6  | -   | 2.6  | - | -   |
| BB795191  | Melanoma antigen (Mela)                                                                                                                      | - | 2.8  | -   | -    | - | -   |
| NM_023061 | Melanoma cell adhesion molecule (Mcam)                                                                                                       | - | 2.1  | -   | -    | - | -   |
| AV298358  | Melanoregulin (Mreg)                                                                                                                         | - | -3   | -   | -    | - | -   |
| BB548141  | Membrane targeting (tandem) C2 domain containing 1 (Mtac2d1)                                                                                 | - | 2.9  | -   | -    | - | -   |
| NM_022429 | Membrane-spanning 4-domains, subfamily A, member 4C (Ms4a4c)                                                                                 | - | 10   | -   | -    | - | -   |
| NM_025658 | Membrane-spanning 4-domains, subfamily A, member 4D (Ms4a4d)                                                                                 | - | -    | -   | -    | - | 4.4 |
| NM_027209 | Membrane-spanning 4-domains, subfamily A, member 6B (Ms4a6b)                                                                                 | - | 7.5  | -   | -    | - | -   |
| NM_026835 | Membrane-spanning 4-domains, subfamily A, member 6D (Ms4a6d)                                                                                 | - | 5.8  | -   | -    | - | 4.5 |
| NM_138670 | Mercaptopyruvate sulfurtransferase (Mpst)                                                                                                    | - | -2.3 | -   | -    | - | -   |
| NM_013602 | Metallothionein 1 (Mt1)                                                                                                                      | - | 3    | -   | 7.2  | - | -   |
| AA796766  | Metallothionein 2 (Mt2)                                                                                                                      | - | 6.9  | 4.1 | 16.5 | - | -   |
| BB326749  | Metastasis suppressor 1 (Mtss1)                                                                                                              | - | 2.3  | -   | -    | - | -   |
| BC021619  | Methionine sulfoxide reductase B2 (Msrb2)                                                                                                    | - | -2   | -   | -    | - | -   |
| BB277041  | Methionine sulfoxide reductase B3 (Msrb3)                                                                                                    | - | 2    | -   | -    | - | -   |
| AK007371  | Methyl-CpG binding domain protein 1 (Mbd1)                                                                                                   | - | 2.3  | 2.7 | 3.4  | - | -   |
| BG076333  | Methylenetetrahydrofolate dehydrogenase (NAD+ dependent), methenyltetrahydrofolate cyclohydrolase (Mthfd2)                                   | - | 3.8  | 3.1 | -    | - | -   |
| NM_138745 | Methylenetetrahydrofolate dehydrogenase (NADP+ dependent), methenyltetrahydrofolate cyclohydrolase, formyltetrahydrofolate synthase (Mthfd1) | - | -2.5 | -   | -    | - | -   |
| BG075139  | Methylthioadenosine phosphorylase (Mtap)                                                                                                     | - | -2.7 | -   | -    | - | -   |
| NM_027853 | Methyltransferase like 7B (Mettl7b)                                                                                                          | - | -2.6 | -   | -    | - | -   |
| BC004636  | Methyltransferase like 8 (Mettl8)                                                                                                            | - | -2.3 | -   | -    | - | -   |
| BC022666  | Microfibrillar-associated protein 4 (Mfap4)                                                                                                  | - | 2.9  | -   | -    | - | -   |
| BC026506  | Microrchidia 3 (Morc3)                                                                                                                       | - | 2.4  | -   | -    | - | -   |
| NM_025569 | Microsomal glutathione S-transferase 3 (Mgst3)                                                                                               | - | -2.3 | -   | -    | - | -   |
| AF026565  | Midline 1 (Mid1)                                                                                                                             | - | 2.5  | -   | -    | - | -   |
| BC020137  | MIT, microtubule interacting and transport, domain containing 1 (Mitd1)                                                                      | - | 2    | -   | -    | - | -   |
| NM_053162 | Mitochondrial ribosomal protein L34 (Mrpl34)                                                                                                 | - | -2.1 | -   | -    | - | -   |
| NM_007746 | Mitogen activated protein kinase kinase kinase 8 (Map3k8)                                                                                    | - | 3.3  | -   | -    | - | -   |

|           |                                                                                |   |      |   |      |   |   |
|-----------|--------------------------------------------------------------------------------|---|------|---|------|---|---|
| NM_016693 | Mitogen-activated protein kinase kinase kinase 6 (Map3k6)                      | - | -    | - | 3.5  | - | - |
| BG067961  | Mitogen-activated protein kinase kinase kinase 5 (Map4k5)                      | - | 2.1  | - | -    | - | - |
| BM196656  | MKL (megakaryoblastic leukemia)/myocardin-like 1 (Mkl1)                        | - | 2.4  | - | -    | - | - |
| AF265663  | MLX interacting protein (Mlxip)                                                | - | 2.8  | - | -    | - | - |
| AF245479  | MLX interacting protein-like (Mlxipl)                                          | - | -2.7 | - | -    | - | - |
| BE288498  | MOB1, Mps One Binder kinase activator-like 2C (Mobkl2c)                        | - | 2    | - | -    | - | - |
| NM_010833 | Moesin (Msn)                                                                   | - | 3.1  | - | -    | - | - |
| BC021914  | Monocyte to macrophage differentiation-associated (Mmd)                        | - | -2.4 | - | -    | - | - |
| AV269411  | Monocyte to macrophage differentiation-associated 2 (Mmd2)                     | - | -3   | - | -    | - | - |
| BB359043  | MTERF domain containing 3 (Mterf3d)                                            | - | -2   | - | -    | - | - |
| NM_013605 | Mucin 1, transmembrane (Muc1)                                                  | - | 5.1  | - | -    | - | - |
| BB485735  | Mucosa associated lymphoid tissue lymphoma translocation gene 1 (Malt1)        | - | 2.7  | - | -    | - | - |
| BI649713  | Muscleblind-like 2 (Mbnl2)                                                     | - | 2.1  | - | -    | - | - |
| NM_139063 | Muted homolog (Muted)                                                          | - | -2.2 | - | -    | - | - |
| AI642973  | Myc target 1 (Myct1)                                                           | - | -    | - | -2.7 | - | - |
| NM_010762 | Myelin and lymphocyte protein, T-cell differentiation protein (Mal)            | - | 2.5  | - | -    | - | - |
| BC003839  | Myeloid cell leukemia sequence 1 (Mcl1)                                        | - | 2.3  | - | -    | - | - |
| NM_008654 | Myeloid differentiation primary response gene 116 (Myd116)                     | - | 2.1  | - | -    | - | - |
| BC005591  | Myeloid differentiation primary response gene 88 (Myd88)                       | - | 3.4  | - | -    | - | - |
| BF021054  | Myeloid/lymphoid or mixed-lineage leukemia 5 (Mll5)                            | - | -    | - | -    | 2 | - |
| NM_023627 | Myo-inositol 1-phosphate synthase A1 (Isyna1)                                  | - | 4.7  | - | -    | - | - |
| C80049    | Myosin, heavy polypeptide 9, non-muscle (Myh9)                                 | - | 2    | - | -    | - | - |
| BB454540  | Myristoylated alanine rich protein kinase C substrate (Marcks)                 | - | 2.4  | - | -    | - | - |
| BI106821  | N-acylsphingosine amidohydrolase (acid ceramidase)-like (Asah1)                | - | 2    | - | -    | - | - |
| AF282864  | N-acylsphingosine amidohydrolase 3-like (Asah3l)                               | - | 3.7  | - | -    | - | - |
| NM_020282 | NAD(P)H dehydrogenase, quinone 2 (Nqo2)                                        | - | -3.7 | - | -    | - | - |
| AW105774  | Napsin A aspartic peptidase (Napsa)                                            | - | 7.4  | - | -    | - | - |
| BB311061  | Nasal embryonic LHRH factor (Nelf)                                             | - | -2.6 | - | -    | - | - |
| BM121794  | Nebulette (Neb1)                                                               | - | 7.5  | - | -    | - | - |
| AA223007  | Nephronectin (Npnt)                                                            | - | 8.1  | - | -    | - | - |
| NM_017464 | Neural precursor cell expressed, developmentally down-regulated gene 9 (Nedd9) | - | 4    | - | -    | - | - |
| BB219343  | Neuregulin 4 (Nrg4)                                                            | - | 4.1  | - | -    | - | - |

|           |                                                                                                |      |      |      |     |     |   |
|-----------|------------------------------------------------------------------------------------------------|------|------|------|-----|-----|---|
| NM_019867 | Neuronal guanine nucleotide exchange factor (Ngef)                                             | -    | -2.6 | -    | -   | -   | - |
| BG070037  | Neuronal PAS domain protein 2 (Npas2)                                                          | -2.1 | -    | -    | -   | -   | - |
| A1844633  | Neutrophil cytosolic factor 1 (Ncf1)                                                           | -    | 3.1  | -    | -   | -   | - |
| NM_008677 | Neutrophil cytosolic factor 4 (Ncf4)                                                           | -    | 2.2  | -    | -   | -   | - |
| NM_008694 | Neutrophilic granule protein (Ngp)                                                             | -    | 3.9  | -    | -   | -   | - |
| AV031928  | Nicolin 1 (Ncn1)                                                                               | -    | -2.1 | -    | -   | -   | - |
| AK006371  | Nicotinamide N-methyltransferase (Nnmt)                                                        | 4.8  | 10   | -    | -   | -   | - |
| BB205930  | Nicotinamide nucleotide transhydrogenase (Nnt)                                                 | -    | -    | -    | -   | 2   | - |
| X14480    | Nidogen 1 (Nid1)                                                                               | -    | 2.3  | -    | -   | -   | - |
| BB528391  | NIMA (never in mitosis gene a)-related expressed kinase 6 (Nek6)                               | -    | 2    | -    | -   | -   | - |
| AK014427  | NIPA-like domain containing 1 (Npal1)                                                          | -    | -2.5 | -    | -   | -   | - |
| AV309418  | N-myc downstream regulated 1 (Ndr1)                                                            | -2.1 | -    | -    | -   | -   | - |
| NM_010878 | Non-catalytic region of tyrosine kinase adaptor protein 1 (Nck1)                               | -    | 2.7  | -    | -   | -   | - |
| NM_010929 | Notch gene homolog 4 (Notch4)                                                                  | -    | 2.5  | -    | -   | -   | - |
| AK004737  | NUAK family, SNF1-like kinase, 2 (Nuak2)                                                       | -    | -    | -    | 2.3 | -   | - |
| BB533448  | Nuclear factor I/C (Nfic)                                                                      | -    | -2   | -    | -   | -   | - |
| AW049660  | Nuclear factor I/X (Nfix)                                                                      | -    | -2   | -    | -   | -   | - |
| BB096843  | Nuclear factor of kappa light chain gene enhancer in B-cells inhibitor, alpha (Nfkb1a)         | -    | 4.1  | -    | 2.3 | -   | - |
| AF155372  | Nuclear factor of kappa light polypeptide gene enhancer in B-cells 2, p49/p100 (Nfkb2)         | -    | 2.3  | -    | -   | -   | - |
| BB820441  | Nuclear factor of kappa light polypeptide gene enhancer in B-cells inhibitor, epsilon (Nfkbie) | -    | 5.3  | -    | -   | -   | - |
| AB026551  | Nuclear factor of kappa light polypeptide gene enhancer in B-cells inhibitor, zeta (Nfkbiz)    | -    | 4.3  | -    | 2.1 | -   | - |
| AY061760  | Nuclear factor, interleukin 3, regulated (Nfil3)                                               | -    | -    | 3.4  | 3   | -   | 2 |
| BC003972  | Nuclear import 7 homolog (Nip7)                                                                | -    | 2.3  | -    | -   | -   | - |
| NM_019738 | Nuclear protein 1 (Nupr1)                                                                      | -    | 3.6  | 4.8  | -   | -   | - |
| BC019540  | Nuclear receptor subfamily 0, group B, member 2 (Nr0b2)                                        | -    | -5.7 | -    | -   | -   | - |
| W13191    | Nuclear receptor subfamily 1, group D, member 1 (Nr1d1)                                        | -3.7 | -    | -    | -   | -   | - |
| NM_011584 | Nuclear receptor subfamily 1, group D, member 2 (Nr1d2)                                        | -    | -    | -2.8 | -   | -   | - |
| AF009328  | Nuclear receptor subfamily 1, group I, member 3 (Nr1h3)                                        | -    | -4.6 | -    | -   | -   | - |
| NM_010150 | Nuclear receptor subfamily 2, group F, member 6 (Nr2f6)                                        | -    | -2   | -    | -   | -   | - |
| BB096079  | Nuclear receptor subfamily 3, group C, member 1 (Nr3c1)                                        | -    | -    | -    | -   | 2.4 | - |
| NM_016773 | Nucleobindin 2 (Nucb2)                                                                         | -    | 3.3  | -    | -   | -   | - |
| BB729616  | Nucleolar protein 5 (Nol5)                                                                     | -    | 4    | -    | -   | -   | - |
| BC026743  | Nucleoporin like 1 (Nupl1)                                                                     | -    | 2    | -    | -   | -   | - |

|           |                                                                                   |      |      |     |     |     |     |
|-----------|-----------------------------------------------------------------------------------|------|------|-----|-----|-----|-----|
| NM_008637 | Nudix (nucleoside diphosphate linked moiety X)-type motif 1 (Nudt1)               | -    | -2.7 | -   | -   | -   | -   |
| AK008824  | Nudix (nucleoside diphosphate linked moiety X)-type motif 7 (Nudt7)               | -    | -2.6 | -   | -   | -   | -   |
| NM_025529 | Nudix (nucleoside diphosphate linked moiety X)-type motif 8 (Nudt8)               | -    | -2   | -   | -   | -   | -   |
| AV290148  | Olfactomedin 4 (Olfm4)                                                            | -    | 3.8  | -   | 7.3 | -   | -   |
| AB015978  | Oncostatin M receptor (Osmr)                                                      | -    | 2.9  | -   | -   | -   | -   |
| NM_008262 | One cut domain, family member 1 (Onecut1)                                         | 2.2  | -    | -   | -   | -   | -   |
| NM_011014 | Opioid receptor, sigma 1 (Opr1)                                                   | -    | -2.8 | -   | -   | -   | -   |
| BC024893  | Ornithine transcarbamylase (Otc)                                                  | -    | -3.2 | -   | -   | -   | -   |
| BE628912  | Orosomucoid 1 (Orm1)                                                              | -    | 2.2  | -   | -   | -   | -   |
| NM_011016 | Orosomucoid 2 (Orm2)                                                              | -    | 13.3 | 3.6 | 3.2 | -   | -   |
| BB143568  | Orphan short chain dehydrogenase/reductase (Sdro)                                 | -    | -2.9 | -   | -   | -   | -   |
| BB542051  | Osteoglycin (Ogn)                                                                 | -    | 5    | -   | -   | -   | -   |
| BC022135  | Oxidative stress induced growth inhibitor 1 (Osgin1)                              | -2.1 | -4.9 | -   | -   | -   | -   |
| NM_138648 | Oxidized low density lipoprotein (lectin-like) receptor 1 (Olr1)                  | -    | 3.5  | -   | -   | -   | -   |
| AK004768  | Oxysterol binding protein-like 3 (Osbp13)                                         | -    | 2.1  | -   | -   | -   | -   |
| AV058500  | P lysozyme structural (L-zps)                                                     | -    | 7.9  | -   | -   | -   | -   |
| AA185884  | Paired box gene 5 (Pax5)                                                          | -    | -    | -   | -   | 2.2 | -   |
| NM_011093 | Paired-Ig-like receptor A1 (Pira1)                                                | -    | 3.5  | -   | -   | -   | -   |
| NM_011087 | Paired-Ig-like receptor A2 (Pira2)                                                | -    | 2.5  | -   | -   | -   | -   |
| BC013446  | Parathyroid hormone receptor 1 (Pthr1)                                            | -    | -2.9 | -   | -   | -   | -   |
| NM_019999 | Paroxysmal nonkinesiogetic dyskinesia (Pnkd)                                      | -    | -3.6 | -   | -   | -   | -   |
| BC024556  | PDZ and LIM domain 2 (Pdlim2)                                                     | -    | 3.7  | -   | -   | -   | -   |
| AK006269  | PDZ domain containing 1 (Pdzk1)                                                   | -    | -2.2 | -   | -   | -   | -   |
| AV376136  | PDZ domain containing 2 (Pdzd2)                                                   | -    | 4.3  | -   | -   | -   | -   |
| NM_018884 | PDZ domain containing RING finger 3 (Pdzm3)                                       | -    | 3.1  | -   | -   | -   | -   |
| NM_018832 | PDZ domain containing, X chromosome (Pdzx)                                        | -    | -2.1 | -   | -   | -   | -   |
| NM_008987 | Pentraxin related gene (Ptx3)                                                     | -    | 3.2  | -   | 3.3 | -   | -   |
| NM_009402 | Peptidoglycan recognition protein 1 (Pglyrp1)                                     | -    | 5.4  | -   | -   | -   | -   |
| NM_008908 | Peptidylprolyl isomerase C (Ppic)                                                 | -    | 3.4  | -   | -   | -   | -   |
| BC011499  | Peptidylprolyl isomerase D (cyclophilin D) (Ppid)                                 | -    | 2.8  | -   | -   | -   | -   |
| AF022992  | Period homolog 1 (Per1)                                                           | 2.6  | 2.8  | -   | -   | -   | -   |
| AF035830  | Period homolog 2 (Per2)                                                           | 4.1  | -    | -   | -   | -   | -   |
| NM_011067 | Period homolog 3 (Per3)                                                           | 2.5  | -    | -   | -   | -   | -   |
| NM_008885 | Peripheral myelin protein (Pmp22)                                                 | -    | 6.9  | -   | -   | -   | -   |
| NM_011068 | Peroxisomal biogenesis factor 11a (Pex11a)                                        | -    | -    | -   | -   | -   | 2.5 |
| AF309644  | Peroxisomal membrane protein 2 (Pxmp2)                                            | -    | -2.4 | -   | -   | -   | -   |
| NM_133249 | Peroxisome proliferative activated receptor, gamma, coactivator 1 beta (Ppargc1b) | -    | -2.2 | -   | -   | -   | -   |
| BM199989  | Peroxisome proliferative activated receptor, gamma, coactivator-related 1 (Pprc1) | -    | 3.7  | -   | -   | -   | -   |



|           |                                                                                  |      |      |   |      |      |   |
|-----------|----------------------------------------------------------------------------------|------|------|---|------|------|---|
| AI327038  | PFTAIRE protein kinase 1 (Pftk1)                                                 | -    | 2.7  | - | -    | -    | - |
| BF715219  | PHD finger protein 20-like 1 (Phf20l1)                                           | -    | 2.6  | - | -    | -    | - |
| NM_021451 | Phorbol-12-myristate-13-acetate-induced protein 1 (Pmaip1)                       | -    | 7    | - | 2.6  | -    | - |
| NM_008903 | Phosphatidic acid phosphatase 2a (Ppap2a)                                        | -    | 2.1  | - | -    | -    | - |
| NM_011083 | Phosphatidylinositol 3-kinase, C2 domain containing, alpha polypeptide (Pik3c2a) | -    | 2    | - | -    | -    | - |
| NM_011084 | Phosphatidylinositol 3-kinase, C2 domain containing, gamma polypeptide (Pik3c2g) | -    | -2.9 | - | -    | -    | - |
| AV340508  | Phosphatidylinositol glycan anchor biosynthesis, class A (Piga)                  | -    | 2.2  | - | -    | -    | - |
| AF030178  | Phosphatidylinositol glycan anchor biosynthesis, class Q (Pigq)                  | -    | -    | - | -    | -2.5 | - |
| AK003713  | Phosphatidylinositol glycan anchor biosynthesis, class Y (Pigy)                  | -    | -2   | - | -    | -    | - |
| BM246564  | Phosphodiesterase 4B, cAMP specific (Pde4b)                                      | -    | 2.3  | - | -    | -    | - |
| BE370618  | Phosphodiesterase 5A, cGMP-specific (Pde5a)                                      | -    | 3.7  | - | -    | -    | - |
| NM_008804 | Phosphodiesterase 9A (Pde9a)                                                     | -    | -2.4 | - | -    | -    | - |
| BB076574  | Phosphofructokinase, platelet (Pfkp)                                             | -    | 2    | - | -    | -    | - |
| BI684288  | Phosphoinositide-3-kinase adaptor protein 1 (Pik3ap1)                            | -    | 2.5  | - | -    | -    | - |
| BM730668  | Phospholipase C, beta 4 (Plcb4)                                                  | -    | 3.2  | - | -    | -    | - |
| BF319989  | Phospholipid scramblase 1 (Plscr1)                                               | -    | 5.9  | - | -    | -    | - |
| BB826296  | Phospholipid scramblase 4 (Plscr4)                                               | -    | -    | - | -2.1 | -    | - |
| BB307726  | Phosphorylase kinase alpha 2 (Phka2)                                             | -    | -2   | - | -    | -    | - |
| BC004827  | Phosphoserine aminotransferase 1 (Psat1)                                         | -    | 4.3  | - | -    | -    | - |
| AF263458  | Placenta-specific 8 (Plac8)                                                      | -    | 5.5  | - | -    | -    | - |
| AV286396  | Plakophilin 4 (Pkp4)                                                             | -    | -2.1 | - | -    | -    | - |
| NM_008872 | Plasminogen activator, tissue (Plat)                                             | -    | 4.1  | - | -    | -    | - |
| X62701    | Plasminogen activator, urokinase receptor (Plaur)                                | -    | 2.3  | - | -    | -    | - |
| AW537708  | Platelet derived growth factor receptor, alpha polypeptide (Pdgfra)              | -    | 5.1  | - | -    | -    | - |
| BC023427  | Platelet derived growth factor, B polypeptide (Pdgfb)                            | -    | 2.5  | - | -    | -    | - |
| NM_008816 | Platelet/endothelial cell adhesion molecule 1 (Pecam1)                           | -    | 3    | - | -    | -    | - |
| NM_019971 | Platelet-derived growth factor, C polypeptide (Pdgfc)                            | -2.4 | -    | - | -    | -    | - |
| AF181829  | Pleckstrin (Plek)                                                                | -    | 2.5  | - | -    | -    | - |
| NM_133244 | Pleckstrin homology domain containing, family K member 1 (Plekhk1)               | -    | 3.1  | - | -    | -    | - |
| NM_011182 | Pleckstrin homology, Sec7 and coiled-coil domains 3 (Pscd3)                      | -    | 2.1  | - | -    | -    | - |
| BB503614  | Pleckstrin homology, Sec7 and coiled-coil domains, binding protein (Pscdcp)      | -    | 5.3  | - | -    | -    | - |
| BB476707  | Plexin C1 (Plxnc1)                                                               | -    | -    | - | -    | 2.4  | - |
| BB559706  | Plexin domain containing 2 (Plxdc2)                                              | -    | 2.6  | - | -    | -    | - |

|           |                                                                        |     |      |      |      |   |     |
|-----------|------------------------------------------------------------------------|-----|------|------|------|---|-----|
| AF290209  | Podocalyxin-like (Pdxl)                                                | -   | 2.5  | -    | -    | - | -   |
| NM_010329 | Podoplanin (Pdpn)                                                      | -   | 5.1  | -    | -    | - | -   |
| NM_009310 | Poliovirus receptor (Pvr)                                              | -   | 2.8  | -    | -    | - | -   |
| BM230222  | Poly (A) polymerase alpha (Papola)                                     | -   | 2    | -    | -    | - | -   |
| BM227980  | Poly (ADP-ribose) polymerase family, member 12 (Parp12)                | -   | -    | -    | -    | - | 2.9 |
| BC021340  | Poly (ADP-ribose) polymerase family, member 14 (Parp14)                | -   | 3.5  | -    | 2.7  | - | -   |
| BC012674  | Polymerase I and transcript release factor (Ptrf)                      | -   | 2.4  | -    | -    | - | -   |
| BM195033  | Polypyrimidine tract binding protein 2 (Ptbp2)                         | -   | -    | -2.2 | -    | - | -   |
| BC006935  | Potassium channel tetramerisation domain containing 10 (Kctd10)        | -   | 2.2  | -    | -    | - | -   |
| AF319542  | Potassium channel, subfamily K, member 5 (Kcmk5)                       | -   | -2.3 | -    | -    | - | -   |
| BB533892  | Potassium inwardly-rectifying channel, subfamily J, member 15 (Kcnj15) | -   | 5.3  | -    | -    | - | -   |
| NM_021342 | Potassium voltage-gated channel, Isk-related subfamily, gene 4 (Kcne4) | -   | 2.2  | -    | -    | - | -   |
| BM250850  | Potassium voltage-gated channel, subfamily Q, member 1 (Kcnq1)         | -   | 2.3  | -    | -    | - | -   |
| AW061073  | PQ loop repeat containing 1 (Pqlc1)                                    | -   | -2.3 | -    | -    | - | -   |
| AV349236  | PR domain containing 8 (Prdm8)                                         | -   | -    | -    | -2.7 | - | -   |
| AW989410  | Pre-B-cell colony-enhancing factor 1 (Pbef1)                           | 2.2 | 4.1  | -    | 2.4  | - | 2.5 |
| AF408412  | Premature ovarian failure 1B (Pof1b)                                   | -   | 2.6  | -    | -    | - | -   |
| BB170718  | Prickle-like 2 (Prickle2)                                              | -   | -    | -    | -2.9 | - | -   |
| AF352788  | Procollagen C-endopeptidase enhancer 2 (Pcocl2)                        | -   | 3.7  | -    | -    | - | -   |
| BC021352  | Procollagen lysine, 2-oxoglutarate 5-dioxygenase 2 (Plod2)             | -   | 4.2  | -    | -    | - | -   |
| BF158638  | Procollagen, type IV, alpha 1 (Col4a1)                                 | -   | 3.5  | -    | -    | - | 2.1 |
| BC013560  | Procollagen, type IV, alpha 2 (Col4a2)                                 | -   | 3.7  | -    | -    | - | -   |
| AV366831  | Procollagen, type IV, alpha 3 (Col4a3)                                 | -   | 3.7  | -    | -    | - | -   |
| BB530633  | Procollagen, type IV, alpha 4 (Col4a4)                                 | -   | 3.3  | -    | -    | - | -   |
| NM_009933 | Procollagen, type VI, alpha 1 (Col6a1)                                 | -   | 2    | -    | -    | - | -   |
| AK018174  | Progesterin and adipoQ receptor family member III (Paqr3)              | -   | 2.1  | -    | -    | - | -   |
| AK010619  | Prohibitin (Phb)                                                       | -   | -2   | -    | -    | - | -   |
| BE651535  | Prokineticin 1 (Prok1)                                                 | -   | -3.5 | -    | -    | - | -   |
| NM_015768 | Prokineticin 2 (Prok2)                                                 | -   | -    | -    | 2.8  | - | 2.6 |
| NM_008932 | Prolactin receptor (Prlr)                                              | -   | -2.7 | -    | -    | - | -   |
| AK011039  | Proline dehydrogenase (oxidase) 2 (Prodh2)                             | -   | -2   | -    | -    | - | -   |
| NM_011172 | Proline dehydrogenase (Prodh)                                          | -   | -2.4 | -    | -    | - | -   |
| BI410130  | Proline-rich nuclear receptor coactivator 1 (Pnrc1)                    | -   | 2.1  | -    | -    | - | -   |
| BB241731  | Proprotein convertase subtilisin/kexin type 5 (Pcsk5)                  | -   | 2    | -    | -    | - | -   |
| BB427703  | ProSAPiP1 protein (Prosapip1)                                          | -   | -2.4 | -    | -    | - | -   |
| BC011193  | Prostaglandin E receptor 4 (subtype EP4) (Ptger4)                      | -   | 2.5  | -    | -    | - | -   |

|           |                                                                                                 |   |      |    |     |   |     |
|-----------|-------------------------------------------------------------------------------------------------|---|------|----|-----|---|-----|
| AV253087  | Prostaglandin F2 receptor negative regulator (Ptgfrn)                                           | - | 3.9  | -  | -   | - | -   |
| M94967    | Prostaglandin-endoperoxide synthase 2 (Ptgs2)                                                   | - | 20.8 | -  | -   | - | -   |
| BB378796  | Protease, serine, 23 (Prss23)                                                                   | - | 4.7  | -  | -   | - | -   |
| NM_011171 | Protein C receptor, endothelial (Procr)                                                         | - | 2.2  | -  | -   | - | -   |
| AF253414  | Protein kinase C, epsilon (Prkce)                                                               | - | 2.4  | -  | -   | - | -   |
| NM_008856 | Protein kinase C, eta (Prkch)                                                                   | - | 2.1  | -  | -   | - | -   |
| AV047342  | Protein kinase inhibitor beta, cAMP dependent, testis specific (Pkib)                           | - | -    | -  | -   | - | 2.1 |
| BB216074  | Protein kinase, cAMP dependent regulatory, type II beta (Prkar2b)                               | - | 2.4  | -  | -   | - | -   |
| BB823350  | Protein kinase, cGMP-dependent, type II (Prkg2)                                                 | - | 2    | -  | -   | - | -   |
| BC006875  | Protein kinase, X-linked (Prkx)                                                                 | - | 2.1  | -  | -   | - | -   |
| U89924    | Protein phosphatase 1, regulatory (inhibitor) subunit 3C (Ppp1r3c)                              | - | -2.5 | -  | -   | - | -   |
| AJ271833  | Protein phosphatase 1B, magnesium dependent, beta isoform (Ppm1b)                               | - | -2.1 | -  | -   | - | -   |
| AV290622  | Protein phosphatase 2C, magnesium dependent, catalytic subunit (Ppm2c)                          | - | 3    | -  | -   | - | -   |
| BB467915  | Protein phosphatase 3, catalytic subunit, alpha isoform (Pp3ca)                                 | - | -    | -2 | -   | - | -   |
| AV331223  | Protein tyrosine phosphatase 4a1 (Ptp4a1)                                                       | - | 2.7  | -  | -   | - | -   |
| BC010191  | Protein tyrosine phosphatase, non-receptor type 1 (Ptpn1)                                       | - | 3.1  | -  | -   | - | -   |
| AV117227  | Protein tyrosine phosphatase, non-receptor type 12 (Ptpn12)                                     | - | 2.1  | -  | -   | - | -   |
| NM_008977 | Protein tyrosine phosphatase, non-receptor type 2 (Ptpn2)                                       | - | 2.2  | -  | -   | - | -   |
| NM_008979 | Protein tyrosine phosphatase, non-receptor type 22 (lymphoid) (Ptpn22)                          | - | -    | -  | -   | - | 2.5 |
| NM_011210 | Protein tyrosine phosphatase, receptor type, C (Ptprc)                                          | - | 3.4  | -  | -   | - | -   |
| NM_011157 | Proteoglycan 1, secretory granule (Prg1)                                                        | - | 6.1  | -  | -   | - | -   |
| NM_021400 | Proteoglycan 4 (megakaryocyte stimulating factor, articular superficial zone protein) (Prg4)    | - | 4.4  | -  | -   | - | -   |
| AK012816  | Proteolipid protein 2 (Plp2)                                                                    | - | 3.2  | -  | -   | - | -   |
| NM_010724 | Proteasome (prosome, macropain) subunit, beta type 8 (large multifunctional peptidase 7) (Psm8) | - | 2    | -  | -   | - | -   |
| NM_013585 | Proteasome (prosome, macropain) subunit, beta type 9 (large multifunctional peptidase 2) (Psm9) | - | 2.2  | -  | 3.1 | - | -   |
| AI323550  | Proviral integration site 1 (Pim1)                                                              | - | 3    | -  | 2.5 | - | -   |
| BB206220  | Proviral integration site 3 (Pim3)                                                              | - | 3.2  | -  | 2.5 | - | -   |
| AK003895  | PRP38 pre-mRNA processing factor 38 (yeast) domain containing B (Prpf38b)                       | - | 2    | -  | -   | - | -   |

|           |                                                                                                                      |   |      |   |   |     |     |
|-----------|----------------------------------------------------------------------------------------------------------------------|---|------|---|---|-----|-----|
| NM_025273 | Pterin 4 alpha carbinolamine dehydratase/dimerization cofactor of hepatocyte nuclear factor 1 alpha (TCF1) 1 (Pcbd1) | - | -2   | - | - | -   | -   |
| BB314559  | Pumilio 1 (Pum1)                                                                                                     | - | -    | - | - | 2.3 | -   |
| AK020001  | Purinergic receptor P2Y, G-protein coupled 10 (P2ry10)                                                               | - | -    | - | - | 2   | -   |
| BC016131  | PX domain containing serine/threonine kinase (Pvx)                                                                   | - | 2    | - | - | -   | -   |
| AV086243  | Pyruvate dehydrogenase kinase, isoenzyme 3 (Pdk3)                                                                    | - | 2.7  | - | - | -   | -   |
| NM_013743 | Pyruvate dehydrogenase kinase, isoenzyme 4 (Pdk4)                                                                    | - | -    | - | - | 3.1 | 4.1 |
| BB667651  | Pyruvate kinase liver and red blood cell (Pklr)                                                                      | - | -2.7 | - | - | -   | -   |
| NM_011099 | Pyruvate kinase, muscle (Pkm2)                                                                                       | - | 3.5  | - | - | -   | -   |
| NM_021881 | Quaking (Qk)                                                                                                         | - | 2.2  | - | - | -   | -   |
| BC017628  | Queuine tRNA-ribosyltransferase domain containing 1 (Qtrtd1)                                                         | - | 2.5  | - | - | -   | -   |
| AK004880  | Quiescin Q6 (Qscn6)                                                                                                  | - | 2    | - | - | -   | -   |
| AI835553  | Rab interacting lysosomal protein (Rilp)                                                                             | - | -2.7 | - | - | -   | -   |
| AW542340  | RAB18, member RAS oncogene family (Rab18)                                                                            | - | 2    | - | - | -   | -   |
| BC010248  | RAB43, member RAS oncogene family (Rab43)                                                                            | - | -2.3 | - | - | -   | -   |
| BM214169  | RAB8B, member RAS oncogene family (Rab8b)                                                                            | - | 3.6  | - | - | -   | -   |
| NM_011233 | RAD17 homolog (Rad17)                                                                                                | - | 2.1  | - | - | -   | -   |
| BB741897  | Radical S-adenosyl methionine domain containing 2 (Rsad2)                                                            | - | 2.4  | - | - | -   | -   |
| NM_009058 | Ral guanine nucleotide dissociation stimulator (Ralgds)                                                              | - | 2.2  | - | - | -   | -   |
| BM507707  | RAN binding protein 2 (Ranbp2)                                                                                       | - | 2.4  | - | - | -   | -   |
| BB106402  | RAN binding protein 9 (Ranbp9)                                                                                       | - | 2.2  | - | - | -   | -   |
| BM230524  | Rap guanine nucleotide exchange factor (GEF) 5 (Rapgef5)                                                             | - | 3.5  | - | - | -   | -   |
| AV307311  | Ras association (RalGDS/AF-6) and pleckstrin homology domains 1 (Raph1)                                              | - | 2.3  | - | - | -   | -   |
| BC018275  | Ras homolog gene family, member B (Rheb)                                                                             | - | 5.3  | - | - | -   | -   |
| AI503490  | Ras homolog gene family, member C (Rhoc)                                                                             | - | 2.1  | - | - | -   | -   |
| AF309564  | Ras homolog gene family, member J (Rhoj)                                                                             | - | 2.1  | - | - | -   | -   |
| BC028444  | Ras interacting protein 1 (Rasip1)                                                                                   | - | 2.8  | - | - | -   | -   |
| BM246972  | RAS related protein 1b (Rap1b)                                                                                       | - | 2.2  | - | - | -   | -   |
| BB217136  | RAS, dexamethasone-induced 1 (Rasd1)                                                                                 | - | 2.3  | - | 2 | -   | -   |
| BI134758  | RasGEF domain family, member 1A (Rasgef1a)                                                                           | - | 2.9  | - | - | -   | -   |
| BB003229  | RasGEF domain family, member 1B (Rasgef1b)                                                                           | - | 2.4  | - | - | -   | -   |
| BF020283  | Rearranged L-myc fusion sequence (Rlf)                                                                               | - | 2.1  | - | - | -   | -   |
| AF146523  | Receptor (calcitonin) activity modifying protein 2 (Ramp2)                                                           | - | 2.7  | - | - | -   | -   |

|           |                                                                                       |      |      |   |      |     |     |
|-----------|---------------------------------------------------------------------------------------|------|------|---|------|-----|-----|
| NM_138952 | Receptor (TNFRSF)-interacting serine-threonine kinase 2 (Ripk2)                       | -    | 3.1  | - | -    | -   | -   |
| AK002562  | Receptor accessory protein 6 (Reep6)                                                  | -    | -3.4 | - | -    | -   | -   |
| BC024872  | Receptor transporter protein 4 (Rtp4)                                                 | -    | 2.8  | - | -    | -   | 3.3 |
| AV255458  | Regulatory factor X, 4 (influences HLA class II expression) (Rfx4)                    | -2.6 | -3   | - | -    | -   | -   |
| NM_031192 | Renin 1 structural (Ren1)                                                             | 2.9  | -    | - | -    | -   | -   |
| NM_020509 | Resistin like alpha (Retnla)                                                          | -    | 11.2 | - | -    | -   | -   |
| BG969810  | Restin (Reed-Steinberg cell-expressed intermediate filament-associated protein) (Rsn) | -    | -    | - | -    | 2.3 | -   |
| BE996483  | Reticulon 4 receptor-like 1 (Rtn4r1)                                                  | -    | -3.1 | - | -    | -   | -   |
| U27177    | Retinoblastoma-like 1 (p107) (Rbl1)                                                   | -    | 2.3  | - | -    | -   | -   |
| NM_023462 | Retinol binding protein 7, cellular (Rbp7)                                            | -    | -    | - | -2.2 | -   | -   |
| NM_009040 | Retinol dehydrogenase 16 (Rdh16)                                                      | -    | -2.9 | - | -    | -   | -   |
| NM_134006 | Retinol dehydrogenase 5 (Rdh5)                                                        | -    | -2   | - | -    | -   | -   |
| BE979765  | Retinol dehydrogenase 9 (Rdh9)                                                        | -    | -2.8 | - | -    | -   | -   |
| BE852181  | Rho family GTPase 1 (Rnd1)                                                            | -    | 4    | - | -    | -   | -   |
| BC012262  | Rho guanine nucleotide exchange factor (GEF) 3 (Arhgef3)                              | -    | 2    | - | -    | -   | -   |
| C76675    | Ribosomal protein S6 (Rps6)                                                           | -    | 3.7  | - | -    | -   | -   |
| W91617    | Ring finger (C3HC4 type) and KH domain containing 1 (Rkhd1)                           | -    | 2.2  | - | -    | -   | -   |
| NM_013916 | Ring finger protein 12 (Rnf12)                                                        | -    | 2    | - | -    | -   | -   |
| BB667823  | Ring finger protein 125 (Rnf125)                                                      | -2.3 | -    | - | -    | -   | -   |
| BC004781  | Ring finger protein 43 (Rnf43)                                                        | -    | -2.4 | - | -    | -   | -   |
| BC021788  | RNA binding protein with multiple splicing 2 (Rbpms2)                                 | -    | -2   | - | -    | -   | -   |
| AV304745  | RRS1 ribosome biogenesis regulator homolog (Rrs1)                                     | -    | 2    | - | -    | -   | -   |
| AV228630  | RUN and FYVE domain containing 3 (Rufy3)                                              | -    | -2.1 | - | -    | -   | -   |
| NM_009821 | Runt related transcription factor 1 (Runx1)                                           | -    | 2    | - | -    | -   | -   |
| BC021916  | S100 calcium binding protein A11 (calizzarin) (S100a11)                               | -    | 8.9  | - | -    | -   | -   |
| D00208    | S100 calcium binding protein A4 (S100a4)                                              | -    | 3.2  | - | -    | -   | -   |
| NM_011313 | S100 calcium binding protein A6 (calcyclin) (S100a6)                                  | -    | 16.7 | - | -    | -   | -   |
| NM_013650 | S100 calcium binding protein A8 (calgranulin A) (S100a8)                              | -    | 39.9 | - | 4.6  | -   | -   |
| NM_009114 | S100 calcium binding protein A9 (calgranulin A) (S100a9)                              | -    | 37.5 | - | 5    | -   | -   |
| BF148012  | SAM domain and HD domain, 1 (Samhd1)                                                  | -    | 3.1  | - | 2    | -   | -   |
| NM_023380 | SAM domain, SH3 domain and nuclear localization signals, 1 (Samsn1)                   | -    | 4.4  | - | -    | -   | -   |
| BC005549  | SAR1 gene homolog A (Sar1a)                                                           | -    | 2    | - | -    | -   | -   |
| BI217574  | Sarcosine dehydrogenase (Sardh)                                                       | -    | -2.9 | - | -    | -   | -   |
| BC016096  | Scavenger receptor class A, member 5 (putative) (Scara5)                              | -    | 3.8  | - | -    | -   | -   |
| BB223018  | Schlafen 1 (Sifn1)                                                                    | -    | -    | - | -    | -   | 2.1 |
| NM_011408 | Schlafen 2 (Sifn2)                                                                    | -    | 2.2  | - | 2.7  | -   | -   |

|           |                                                                                                                                                      |   |       |      |      |   |     |
|-----------|------------------------------------------------------------------------------------------------------------------------------------------------------|---|-------|------|------|---|-----|
| NM_011409 | Schlafen 3 (Slfn3)                                                                                                                                   | - | 2.8   | -    | 3.1  | - | -   |
| AF099975  | Schlafen 4 (Slfn4)                                                                                                                                   | - | 23.7  | -    | 10.4 | - | 4.3 |
| BB134615  | Schlafen 5 (Slfn5)                                                                                                                                   | - | 2.6   | -    | -    | - | -   |
| NM_022886 | Sciellin (Scel)                                                                                                                                      | - | 3.5   | -    | -    | - | -   |
| BC010238  | Scotin gene (Scotin)                                                                                                                                 | - | 2     | -    | -    | - | -   |
| X67702    | Secretoglobin, family 1A, member 1 (uteroglobin) (Scgb1a1)                                                                                           | - | 115.5 | -    | -    | - | -   |
| AF274959  | Secretoglobin, family 3A, member 2 (Scgb3a2)                                                                                                         | - | 21    | -2.5 | -    | - | -   |
| NM_011414 | Secretory leukocyte peptidase inhibitor (Slpi)                                                                                                       | - | 3.5   | 2.3  | -    | - | -   |
| M36005    | Selectin, lymphocyte (Sell)                                                                                                                          | - | 2.5   | -    | -    | - | -   |
| BB224329  | Selectin, platelet (Selp)                                                                                                                            | - | -     | -    | -    | - | 2.7 |
| M72332    | Selectin, platelet (Selp)                                                                                                                            | - | 2.2   | -    | -    | - | -   |
| AW122690  | Selenoprotein K (Selk)                                                                                                                               | - | 2.2   | -    | -    | - | -   |
| AA144045  | Sema domain, immunoglobulin domain (Ig), and GPI membrane anchor, (semaphorin) 7A (Sema7a)                                                           | - | 2.7   | -    | -    | - | -   |
| AF080090  | Sema domain, immunoglobulin domain (Ig), short basic domain, secreted, (semaphorin) 3 F (Sema3f)                                                     | - | 2.4   | -    | -    | - | -   |
| AK004119  | Sema domain, immunoglobulin domain (Ig), short basic domain, secreted, (semaphorin) 3C (Sema3c)                                                      | - | 7.7   | -    | -    | - | -   |
| NM_011348 | Sema domain, immunoglobulin domain (Ig), short basic domain, secreted, (semaphorin) 3E (Sema3e)                                                      | - | 3.9   | -    | -    | - | -   |
| NM_011976 | Sema domain, immunoglobulin domain (Ig), transmembrane domain (TM) and short cytoplasmic domain, (semaphorin) 4G (Sema4g)                            | - | -3.7  | -    | -    | - | -   |
| AV375653  | Sema domain, seven thrombospondin repeats (type 1 and type 1-like), transmembrane domain (TM) and short cytoplasmic domain, (semaphorin) 5A (Sema5a) | - | 5.2   | -    | -    | - | -   |
| NM_009154 | Semaphorin 5A (Sema5a)                                                                                                                               | - | -     | -    | 2.3  | - | -   |
| AK007282  | Seminal vesicle secretion 5 (Svs5)                                                                                                                   | - | -3.5  | -    | -    | - | -   |
| NM_017380 | Septin 9 (Sept9)                                                                                                                                     | - | -2.1  | -    | -    | - | -   |
| BC018416  | Serine (or cysteine) peptidase inhibitor, clade A (alpha-1 antiproteinase, antitrypsin), member 10 (Serpina10)                                       | - | 2.4   | -    | -    | - | -   |
| BB222737  | Serine (or cysteine) peptidase inhibitor, clade A (alpha-1 antiproteinase, antitrypsin), member 7 (Serpina7)                                         | - | 8.4   | -    | -    | - | -   |
| AK009343  | Serine (or cysteine) peptidase inhibitor, clade A (alpha-1 antiproteinase, antitrypsin), member 9 (Serpina9)                                         | - | -2.8  | -    | -    | - | -   |
| NM_008458 | Serine (or cysteine) peptidase inhibitor, clade A, member 3C (Serpina3c)                                                                             | - | 4     | -    | 2.9  | - | -   |
| BC002065  | Serine (or cysteine) peptidase inhibitor, clade A, member 3G (Serpina3g)                                                                             | - | 20.9  | -    | 11.6 | - | 3.7 |

|           |                                                                          |     |      |      |      |     |     |
|-----------|--------------------------------------------------------------------------|-----|------|------|------|-----|-----|
| BC011158  | Serine (or cysteine) peptidase inhibitor, clade A, member 3M (Serpina3m) | -   | -    | -    | 4.2  | -   | -   |
| NM_009252 | Serine (or cysteine) peptidase inhibitor, clade A, member 3N (Serpina3n) | -   | 3.6  | 6.4  | 11.9 | -   | 4   |
| NM_007618 | Serine (or cysteine) peptidase inhibitor, clade A, member 6 (Serpina6)   | -   | -6.3 | -    | -    | -   | -   |
| NM_011454 | Serine (or cysteine) peptidase inhibitor, clade B, member 6b (Serpina6b) | -   | 9.3  | -    | -    | -   | -   |
| NM_009256 | Serine (or cysteine) peptidase inhibitor, clade B, member 9 (Serpina9)   | -   | 2.1  | -    | -    | -   | -   |
| NM_008223 | Serine (or cysteine) peptidase inhibitor, clade D, member 1 (Serpind1)   | -   | -2.1 | -    | 4    | -   | -   |
| NM_009255 | Serine (or cysteine) peptidase inhibitor, clade E, member 2 (Serpine2)   | -   | 6.5  | -    | -    | -   | -   |
| AK012411  | Serine (or cysteine) peptidase inhibitor, clade F, member 1 (Serpina1)   | -   | -2   | -    | -    | -   | -   |
| BI220012  | Serine (or cysteine) peptidase inhibitor, clade H, member 1 (Serpina1)   | -   | 2.5  | -    | -    | -   | -   |
| NM_009171 | Serine hydroxymethyl transferase 1 (soluble) (Shmt1)                     | -   | -2.9 | -    | -    | -   | -   |
| BM222403  | Serine hydroxymethyl transferase 2 (mitochondrial) (Shmt2)               | -   | -2.1 | -    | -    | -   | -   |
| BM239368  | Serine incorporator 3 (Serinc3)                                          | -   | 2.8  | -    | -    | -   | -   |
| BC003227  | Serine palmitoyltransferase, long chain base subunit 2 (Sptlc2)          | -   | 2.1  | -    | -    | -   | -   |
| NM_016907 | Serine protease inhibitor, Kunitz type 1 (Spint1)                        | -   | 2.1  | -    | -    | -   | -   |
| BQ173986  | Serine racemase (Srr)                                                    | -   | -2   | -    | -    | -   | -   |
| AV173139  | Serine/threonine kinase 17b (apoptosis-inducing) (Stk17b)                | -   | 2.2  | -    | -    | -   | -   |
| NM_011314 | Serum amyloid A 1 (Saa1)                                                 | 5.2 | 43   | -    | 5.2  | -   | -   |
| NM_011315 | Serum amyloid A 3 (Saa3)                                                 | -   | 53   | 13.7 | 29.4 | -   | 6.7 |
| NM_011316 | Serum amyloid A 4 (Saa4)                                                 | -   | 2    | -    | -    | -   | -   |
| NM_011318 | Serum amyloid P-component (Apcs)                                         | -   | 2.7  | -    | -    | -   | -   |
| NM_013731 | Serum/glucocorticoid regulated kinase 2 (Sgk2)                           | -   | -4.9 | -    | -    | -   | -   |
| AV016566  | Sestrin 1 (Sesn1)                                                        | -   | -    | -    | -    | 2.4 | -   |
| BC023119  | SET and MYND domain containing 2 (Smyd2)                                 | -   | -2.2 | -    | -    | -   | -   |
| NM_021423 | SH3/ankyrin domain gene 3 (Shank3)                                       | -   | 2    | -    | -    | -   | -   |
| NM_015756 | Shroom family member 3 (Shroom3)                                         | -   | 2.1  | -    | -    | -   | -   |
| BG066686  | Sideroflexin 2 (Sfxn2)                                                   | -   | -2   | -    | -    | -   | -   |
| BB379739  | Sideroflexin 5 (Sfxn5)                                                   | -   | -2.3 | -    | -    | -   | -   |
| W08076    | Signal recognition particle 19 (Srp19)                                   | -   | 2.2  | -    | -    | -   | -   |
| BC005543  | Signal recognition particle 54 (Srp54)                                   | -   | 2.2  | -    | -    | -   | -   |
| NM_009275 | Signal recognition particle receptor, B subunit (Sprb)                   | -   | 2    | -    | -    | -   | -   |
| AW214029  | Signal transducer and activator of transcription 1 (Stat1)               | -   | 3.5  | -    | 2.7  | -   | -   |
| AF088862  | Signal transducer and activator of transcription 2 (Stat2)               | -   | 2.3  | -    | -    | -   | -   |

|           |                                                                                      |   |      |      |      |      |     |
|-----------|--------------------------------------------------------------------------------------|---|------|------|------|------|-----|
| AK004083  | Signal transducer and activator of transcription 3 (Stat3)                           | - | 2.1  | -    | -    | -    | -   |
| BC024319  | Signal transducer and activator of transcription 5B (Stat5b)                         | - | -2.2 | -    | -    | -    | -   |
| AV245241  | similar to EH-domain containing 2 (Ehd2)                                             | - | 2    | -    | -    | -    | -   |
| BI666155  | Similar to guanine nucleotide binding protein-like 2 (nucleolar) (Gnl2)              | - | 2.3  | -    | -    | -    | -   |
| W91024    | Similar to histone 2a (H2A)                                                          | - | 2    | -    | -    | -    | -   |
| NM_008329 | Similar to Interferon-activatable protein 204 (Ifi-204)                              | - | 4.3  | -    | -    | -    | 3.3 |
| AY052560  | Similar to RNA-binding motif protein 3 (Rbm3)                                        | - | 2.8  | -    | -    | -    | -   |
| AI662854  | Similar to SIRP beta 1 isoform 2                                                     | - | -    | -    | -    | -    | 2   |
| BG083485  | Similar to Transcription factor SOX-4                                                | - | -    | -    | -3.1 | -    | -   |
| AF170906  | Single-stranded DNA binding protein 3 (Ssbp3)                                        | - | -2.1 | -    | -    | -    | -   |
| BC026403  | Sirtuin 7 (silent mating type information regulation 2, homolog) 7 (Sirt7)           | - | -2   | -    | -    | -    | -   |
| BB704967  | SLAIN motif family, member 1 (Slain1)                                                | - | -    | -    | -    | 2.1  | -   |
| BB493265  | Small nucleolar RNA, C/D box 22 (Snord22)                                            | - | 2.4  | -    | -    | -    | -   |
| BG807990  | Small nucleolar RNA, H/ACA box 65 (Snora65)                                          | - | 2.4  | -    | -    | -    | -   |
| AV299469  | Smith-Magenis syndrome chromosome region, candidate 7 homolog (Smcr7)                | - | -2.1 | -    | -    | -    | -   |
| NM_011326 | Sodium channel, nonvoltage-gated 1 gamma (Scnn1g)                                    | - | 2.9  | -    | -    | -    | -   |
| BB096886  | Sodium channel, voltage-gated, type III, alpha (Scn3a)                               | - | -    | -2.7 | -2.7 | -    | -   |
| BE951842  | Sodium channel, voltage-gated, type III, beta (Scn3b)                                | - | 3.2  | -    | -    | -    | -   |
| BB452990  | Sodium channel, voltage-gated, type VII, alpha (Scn7a)                               | - | 4    | -    | -2.3 | -    | -   |
| NM_009201 | Solute carrier family 1 (neutral amino acid transporter), member 5 (Slc1a5)          | - | 2.1  | -    | -    | -    | -   |
| AV244484  | Solute carrier family 10 (sodium/bile acid cotransporter family), member 6 (Slc10a6) | - | 4.6  | -    | 2.2  | -    | -   |
| BG069505  | Solute carrier family 12, member 2 (Slc12a2)                                         | - | 2.1  | -    | -    | -    | -   |
| BE979238  | Solute carrier family 13 (sodium-dependent citrate transporter), member 5 (Slc13a5)  | - | 3.8  | -    | -    | -    | -   |
| NM_023044 | Solute carrier family 15, member 3 (Slc15a3)                                         | - | 3.3  | -    | -    | -    | -   |
| AW105741  | Solute carrier family 16 (monocarboxylic acid transporters), member 2 (Slc16a2)      | - | -2.5 | -    | -    | -    | -   |
| BB449198  | Solute carrier family 19 (thiamine transporter), member 2 (Slc19a2)                  | - | -4.2 | -    | -    | -    | -   |
| AB008453  | Solute carrier family 2 (facilitated glucose transporter), member 4 (Slc2a4)         | - | -    | -    | -    | -2.3 | -   |
| BB148652  | Solute carrier family 2 (facilitated glucose transporter), member 9 (Slc2a9)         | - | -2.8 | -    | -    | -    | -   |
| BC026598  | Solute carrier family 22 (organic anion transporter), member 7 (Slc22a7)             | - | -2.6 | -    | -    | -    | -   |



|           |                                                                                                       |      |      |     |     |   |   |
|-----------|-------------------------------------------------------------------------------------------------------|------|------|-----|-----|---|---|
| BF577497  | Solute carrier family 22 (organic cation transporter), member 18 (Slc22a18)                           | -    | -2.1 | -   | -   | - | - |
| NM_008767 | Solute carrier family 22 (organic cation transporter), member 18 (Slc22a18)                           | -    | -2.2 | -   | -   | - | - |
| AV327862  | Solute carrier family 25 (mitochondrial carrier, adenine nucleotide translocator), member 4 (Slc25a4) | -    | 5.1  | -   | -   | - | - |
| BC003222  | Solute carrier family 25 (mitochondrial carrier, dicarboxylate transporter), member 10 (Slc25a10)     | -    | -2.3 | -   | -   | - | - |
| NM_025877 | Solute carrier family 25 (mitochondrial carrier; phosphate carrier), member 23 (Slc25a23)             | -    | -2.9 | -   | -   | - | - |
| BB503267  | Solute carrier family 25, member 36 (Slc25a36)                                                        | -    | 2.4  | -   | -   | - | - |
| BC025937  | Solute carrier family 25, member 42 (Slc25a42)                                                        | -    | -2.6 | -   | -   | - | - |
| BC022130  | Solute carrier family 26 (sulfate transporter), member 1 (Slc26a1)                                    | -    | -3.4 | -   | -   | - | - |
| NM_011867 | Solute carrier family 26, member 4 (Slc26a4)                                                          | -    | -    | 2.8 | -   | - | - |
| AF305501  | Solute carrier family 29 (nucleoside transporters), member 1 (Slc29a1)                                | -    | -3.3 | -   | -   | - | - |
| NM_022885 | Solute carrier family 30 (zinc transporter), member 5 (Slc30a5)                                       | -    | 2.2  | -   | -   | - | - |
| BB736474  | Solute carrier family 30, member 10 (Slc30a10)                                                        | -2   | -    | -   | -   | - | - |
| NM_011402 | Solute carrier family 34 (sodium phosphate), member 2 (Slc34a2)                                       | -    | 9    | -   | -   | - | - |
| AV376428  | Solute carrier family 37 (glycerol-3-phosphate transporter), member 1 (Slc37a1)                       | -    | 2.6  | -   | -   | - | - |
| BM248527  | Solute carrier family 38, member 2 (Slc38a2)                                                          | -    | 2.8  | -   | -   | - | - |
| BB825002  | Solute carrier family 39 (metal ion transporter), member 6 (Slc39a6)                                  | -    | 2    | -   | -   | - | - |
| NM_026228 | Solute carrier family 39 (metal ion transporter), member 8 (Slc39a8)                                  | -    | 2.6  | -   | -   | - | - |
| BM250411  | Solute carrier family 39 (zinc transporter), member 10 (Slc39a10)                                     | -    | 3.1  | -   | -   | - | - |
| BB399837  | Solute carrier family 39 (zinc transporter), member 14 (Slc39a14)                                     | -    | 2.9  | -   | 2.4 | - | - |
| BE655147  | Solute carrier family 4 (anion exchanger), member 4 (Slc4a4)                                          | -2.3 | -    | -   | -   | - | - |
| BF134253  | Solute carrier family 41, member 1 (Slc41a1)                                                          | -    | 3.2  | -   | -   | - | - |
| BC026874  | Solute carrier family 41, member 2 (Slc41a2)                                                          | -    | 9.9  | -   | -   | - | - |
| NM_021398 | Solute carrier family 43, member 3 (Slc43a3)                                                          | -    | 3    | -   | -   | - | - |
| BB145101  | Solute carrier family 44, member 2 (Slc44a2)                                                          | -    | 3.4  | -   | -   | - | - |
| AF320226  | Solute carrier family 6 (neurotransmitter transporter), member 14 (Slc6a14)                           | -    | 14.1 | -   | -   | - | - |
| NM_133661 | Solute carrier family 6 (neurotransmitter transporter, betaine/GABA), member 12 (Slc6a12)             | -    | -2.1 | -   | -   | - | - |

|           |                                                                                           |   |      |     |      |     |     |
|-----------|-------------------------------------------------------------------------------------------|---|------|-----|------|-----|-----|
| BC023117  | Solute carrier family 6 (neurotransmitter transporter, GABA), member 13 (Slc6a13)         | - | -2.4 | -   | -    | -   | -   |
| BB057781  | Solute carrier family 6 (neurotransmitter transporter, noradrenalin), member 2 (Slc6a2)   | - | 2    | -   | -    | -   | -   |
| BB453858  | Solute carrier family 7 (cationic amino acid transporter, y+ system), member 11 (Slc7a11) | - | -    | 2.2 | -    | -   | -   |
| NM_030687 | Solute carrier organic anion transporter family, member 1a4 (Slco1a4)                     | - | -2.7 | -   | -    | -   | -   |
| BB553107  | Solute carrier organic anion transporter family, member 2b1 (Slco2b1)                     | - | -2.2 | -   | -    | -   | -   |
| NM_023908 | Solute carrier organic anion transporter family, member 3a1 (Slco3a1)                     | - | 2.7  | -   | -    | -   | -   |
| AV024403  | Solute carrier organic anion transporter family, member 4C1 (Slco4c1)                     | - | 4.1  | -   | -    | -   | -   |
| BI143942  | Sorbitol dehydrogenase (Sord)                                                             | - | -4.7 | -   | -    | -   | -   |
| BI648081  | Sortilin-related receptor, LDLR class A repeats-containing (Sorl1)                        | - | 2.8  | -   | -    | 2   | -   |
| AK010399  | Sorting nexin 10 (Snx10)                                                                  | - | 6.8  | -   | -    | -   | -   |
| BM117672  | Sparc/osteonectin, cwcv and kazal-like domains proteoglycan 2 (Spock2)                    | - | 3.2  | -   | -    | -   | -   |
| NM_010097 | SPARC-like 1 (mast9, hevin) (Sparcl1)                                                     | - | 2.8  | -   | -    | -   | -   |
| BQ174069  | Spectrin beta 2 (Spnb2)                                                                   | - | 2.2  | -   | -    | -   | -   |
| AF068749  | Sphingosine kinase 1 (Sphk1)                                                              | - | 3.1  | -   | -    | -   | -   |
| BC023083  | SplA/ryanodine receptor domain and SOCS box containing 4 (Spsb4)                          | - | -3.2 | -   | -    | -   | -   |
| U36776    | Spleen tyrosine kinase (Syk)                                                              | - | 2.1  | -   | -    | -   | -   |
| BC027391  | Splicing factor, arginine/serine-rich 7 (Sfrs7)                                           | - | 2    | -   | -    | -   | -   |
| BC020531  | Spondin 1, (f-spondin) extracellular matrix protein (Spon1)                               | - | 8.7  | -   | -    | -   | -   |
| BB529691  | Sprouty homolog 2 (Spry2)                                                                 | - | 2.1  | -   | -    | -   | -   |
| BM242524  | SPT2, Suppressor of Ty, domain containing 1 (Spty2d1)                                     | - | 3    | -   | -    | -   | -   |
| NM_009270 | Squalene epoxidase (Sqle)                                                                 | - | 2.1  | -   | -    | -   | -   |
| AV247013  | Src-like adaptor (Sla)                                                                    | - | -    | -   | -    | 2   | -   |
| AK004781  | SRY-box containing gene 17 (Sox17)                                                        | - | 2.2  | -   | -    | -   | -   |
| AI428101  | SRY-box containing gene 4 (Sox4)                                                          | - | -    | -   | -2.2 | -   | -   |
| NM_018784 | ST3 beta-galactoside alpha-2,3-sialyltransferase 6 (St3gal3)                              | - | 2.1  | -   | -    | -   | -   |
| NM_054098 | STEAP family member 4 (Steap4)                                                            | - | 7.5  | -   | 3.7  | -   | 6.1 |
| BG060909  | Stearoyl-Coenzyme A desaturase 2 (Scd2)                                                   | - | 2.9  | -   | -    | -   | -   |
| BB667930  | Stefin A2 like 1 (Stfa2l1)                                                                | - | 2.2  | -   | 3.4  | -   | -   |
| BB145092  | Sterile alpha motif domain containing 9-like (Samd9l)                                     | - | 2.5  | -   | -    | -   | -   |
| AV003635  | Steroid 5 alpha-reductase 1 (Srd5a1)                                                      | - | -2.3 | -   | -    | -   | -   |
| BG064396  | Sterol O-acyltransferase 1 (Soat1)                                                        | - | 3    | -   | -    | 2.4 | -   |
| AI326423  | Sterol regulatory element binding factor 1 (Sreb1)                                        | - | -4   | -   | -    | -   | -   |
| AB016248  | Sterol-C5-desaturase (fungal ERG3, delta-5-desaturase) homolog (Sc5d)                     | - | -2.5 | -   | -    | -   | -   |

|           |                                                                                   |      |       |     |     |   |     |
|-----------|-----------------------------------------------------------------------------------|------|-------|-----|-----|---|-----|
| BF148215  | Strawberry notch homolog 2 (Sbno2)                                                | -    | 2.8   | -   | -   | - | -   |
| BE533039  | Stress 70 protein chaperone, microsomal-associated, human homolog (Stch)          | -    | 2.7   | -   | -   | - | -   |
| BF148627  | Striatin, calmodulin binding protein 3 (Strn3)                                    | -    | 2     | -   | -   | - | -   |
| NM_022324 | Stromal cell-derived factor 2-like 1 (Sdf2l1)                                     | -    | -     | 2   | -   | - | -   |
| NM_032400 | Succinate receptor 1 (Sucnr1)                                                     | -    | -7.9  | -   | -   | - | -   |
| BM210600  | Sulfiredoxin 1 homolog (Srxn1)                                                    | -    | -     | 2.7 | -   | - | -   |
| BC027197  | Sulfite oxidase (Suox)                                                            | -    | -2.5  | -   | -   | - | -   |
| NM_023135 | Sulfotransferase family 1E, member 1 (Sult1e1)                                    | 2.6  | -     | -   | -   | - | -   |
| NM_026935 | Sulfotransferase family, cytosolic, 1C, member 2 (Sult1c2)                        | -    | -3.6  | -   | -   | - | -   |
| BQ174944  | Superoxide dismutase 2, mitochondrial (Sod2)                                      | -    | 2.3   | -   | -   | - | -   |
| AB000710  | Suppressor of cytokine signaling 1 (Socs1)                                        | -    | 8     | -   | -   | - | -   |
| BB241535  | Suppressor of cytokine signaling 3 (Socs3)                                        | -    | 15    | -   | 4   | - | 5.3 |
| NM_023134 | Surfactant associated protein A1 (Sftpa1)                                         | -    | 67.6  | -   | -   | - | -   |
| AV025094  | Surfactant associated protein B (Sftpb)                                           | -    | 15.6  | -   | -   | - | -   |
| NM_011359 | Surfactant associated protein C (Sftpc)                                           | -    | 119.4 | -   | -   | - | -   |
| BC003705  | Surfactant associated protein D (Sftpd)                                           | -    | 34.3  | -   | -   | - | -   |
| BI788645  | Syndecan 1 (Sdc1)                                                                 | -    | -2.2  | -   | -   | - | -   |
| BC005679  | Syndecan 4 (Sdc4)                                                                 | -    | -     | -   | -   | - | 3.9 |
| AV227603  | Syndecan binding protein (Sdcbp)                                                  | -    | 2.1   | -   | -   | - | -   |
| AK017897  | Syntaxin 11 (Stx11)                                                               | -    | 2.1   | -   | -   | - | -   |
| AK016910  | Syntaxin 18 (Stx18)                                                               | -    | 2     | -   | -   | - | -   |
| AF326545  | Syntaxin binding protein 1 (Stxbp1)                                               | -    | 2     | -   | -   | - | -   |
| BI646094  | Syntrophin, basic 2 (Sntb2)                                                       | -    | 2.2   | -   | -   | - | -   |
| NM_133742 | Syntrophin, gamma 2 (Sntg2)                                                       | -    | -2.7  | -   | -   | - | -   |
| AW555571  | TAF9B RNA polymerase II, TATA box binding protein (TBP)-associated factor (Taf9b) | -    | 2     | -   | -   | - | -   |
| NM_019786 | TANK-binding kinase 1 (Tbk1)                                                      | -    | 2.4   | -   | -   | - | -   |
| BG070463  | Taxilin alpha (Txlna)                                                             | -    | 2.1   | -   | -   | - | -   |
| AA270038  | TBC1 domain family, member 24 (Tbc1d24)                                           | -    | 2.2   | -   | -   | - | -   |
| AK014817  | TBC1 domain family, member 8B (Tbc1d8b)                                           | -    | 2     | -   | -   | - | -   |
| AV226212  | T-box 4 (Tbx4)                                                                    | -    | 2.9   | -   | -   | - | -   |
| BB707122  | TCDD-inducible poly(ADP-ribose) polymerase (Tiparp)                               | -    | 3     | -   | -   | - | 2.1 |
| BC028829  | T-cell immunoglobulin and mucin domain containing 2 (Timd2)                       | -    | -2.6  | -   | -   | - | -   |
| NM_011579 | T-cell specific GTPase (Tgtp)                                                     | -    | 11.1  | -   | 7.2 | - | 4.1 |
| NM_027884 | Tensin 1 (Tns1)                                                                   | -    | 2.7   | -   | -   | - | -   |
| BC010465  | Testis derived transcript (Tes)                                                   | -    | 2.5   | -   | -   | - | -   |
| BB807707  | Tetraspanin 13 (Tspan13)                                                          | -    | 5.6   | -   | -   | - | -   |
| BC007185  | Tetraspanin 2 (Tspan2)                                                            | -    | 3     | -   | -   | - | -   |
| BC025461  | Tetraspanin 8 (Tspan8)                                                            | -    | 12.8  | -   | -   | - | -   |
| BG073155  | THAP domain containing, apoptosis associated protein 2 (Thap2)                    | -    | 2.2   | -   | -   | - | -   |
| NM_025790 | Thioesterase superfamily member 2 (Them2)                                         | -    | -2.5  | -   | -   | - | -   |
| BB744467  | Thiopurine methyltransferase (Tpmt)                                               | -    | -2.2  | -   | -   | - | -   |
| BC025604  | Threonine synthase-like 2 (Thnsl2)                                                | -2.1 | -3    | -   | -   | - | -   |

|           |                                                                           |   |      |     |     |   |     |
|-----------|---------------------------------------------------------------------------|---|------|-----|-----|---|-----|
| BQ176328  | Threonyl-tRNA synthetase-like 2 (Tarsl2)                                  | - | -2   | -   | -   | - | -   |
| NM_009378 | Thrombomodulin (Thbd)                                                     | - | 9.5  | -   | -   | - | -   |
| AI385532  | Thrombospondin 1 (Thbs1)                                                  | - | 4.1  | -   | -   | - | -   |
| NM_009387 | Thymidine kinase 1 (Tk1)                                                  | - | -3.1 | -   | -   | - | -   |
| BB521695  | Thymoma viral proto-oncogene 3 (Akt3)                                     | - | 2.7  | -   | -   | - | -   |
| BB096368  | Thymosin, beta 10 (Tmsb10)                                                | - | 2.9  | -   | -   | - | -   |
| NM_021278 | Thymosin, beta 4, X chromosome (Tmsb4x)                                   | - | 2.2  | -   | -   | - | -   |
| NM_009381 | Thyroid hormone responsive SPOT14 homolog (Thrsp)                         | 3 | -    | -   | -   | - | -   |
| BC008107  | Tissue inhibitor of metalloproteinase 1 (Timp1)                           | - | 5.6  | 3.2 | 7.1 | - | -   |
| BI111620  | Tissue inhibitor of metalloproteinase 3 (Timp3)                           | - | 5.9  | -   | -   | - | -   |
| BI788452  | Tissue inhibitor of metalloproteinase 4 (Timp4)                           | - | -    | 2.3 | 2.1 | - | -   |
| BB718785  | TM2 domain containing 2 (Tm2d2)                                           | - | -2.4 | -   | -   | - | -   |
| AJ242777  | TNFAIP3 interacting protein 1 (Tnip1)                                     | - | 2.3  | -   | -   | - | -   |
| NM_139064 | TNFAIP3 interacting protein 2 (Tnip2)                                     | - | 2.2  | -   | -   | - | -   |
| BI655907  | Toll-like receptor 13 (Tlr13)                                             | - | -    | -   | 2   | - | -   |
| NM_011905 | Toll-like receptor 2 (TLR2)                                               | - | 9.2  | -   | -   | - | -   |
| AF185285  | Toll-like receptor 4 (TLR4)                                               | - | 2.6  | -   | -   | - | -   |
| BB277065  | Traf2 binding protein (T2bp)                                              | - | 14.4 | -   | 2.7 | - | -   |
| BB795263  | Trafficking protein, kinesin binding 2 (Trak2)                            | - | 2.5  | -   | -   | - | -   |
| BC010807  | Transcription elongation factor A (SII), 3 (Tcea3)                        | - | -5.2 | -   | -   | - | -   |
| AI987804  | Transcription factor 2 (Tcf2)                                             | - | -2.2 | -   | -   | - | -   |
| BB364520  | Transcription factor 4 (Tcf4)                                             | - | 2.2  | -   | -   | - | -   |
| AV174616  | Transducer of ERBB2, 2 (Tob2)                                             | - | 2    | -   | -   | - | -   |
| NM_009389 | Transducin-like enhancer of split 3, homolog of Drosophila E(spl) (Tle3)  | - | 2    | -   | -   | - | -   |
| BM237750  | Transferrin (Trf)                                                         | - | 3.6  | -   | -   | - | -   |
| AW495711  | Transformation related protein 53 inducible nuclear protein 1 (Trp53inp1) | - | 2    | -   | -   | - | -   |
| BG793483  | Transforming growth factor, beta receptor II (Tgfbr2)                     | - | 2.3  | -   | -   | - | -   |
| BC004057  | Transforming, acidic coiled-coil containing protein 2 (Tacc2)             | - | 6.8  | -   | -   | - | -   |
| BB550124  | Transglutaminase 2, C polypeptide (Tgm2)                                  | - | 2.5  | -   | -   | - | 2.1 |
| BQ177170  | Transmembrane 4 superfamily member 1 (Tm4sf1)                             | - | 2.7  | -   | -   | - | -   |
| BC024498  | Transmembrane 6 superfamily member 2 (Tm6sf2)                             | - | -2.2 | -   | -   | - | -   |
| AK004359  | Transmembrane and coiled-coil domains 2 (Tmcc2)                           | - | 5    | -   | -   | - | -   |
| BB667469  | Transmembrane channel-like gene family 4 (Tmc4)                           | - | 2.8  | -   | -   | - | -   |
| NM_025458 | Transmembrane emp24 protein transport domain containing 6 (Tmed6)         | - | -2.2 | -   | -   | - | -   |
| NM_026433 | Transmembrane protein 100 (Tmem100)                                       | - | 7.5  | -   | -   | - | -   |
| AW551717  | Transmembrane protein 141 (Tmem141)                                       | - | -2   | -   | -   | - | -   |
| BC014685  | Transmembrane protein 150 (Tmem150)                                       | - | -3   | -   | -   | - | -   |

|           |                                                                    |   |      |     |     |     |     |
|-----------|--------------------------------------------------------------------|---|------|-----|-----|-----|-----|
| BC006049  | Transmembrane protein 176A (Tmem176a)                              | - | 2.4  | -   | -   | -   | -   |
| BB400326  | Transmembrane protein 180 (Tmem180)                                | - | -3   | -   | -   | -   | -   |
| BC019745  | Transmembrane protein 2 (Tmem2)                                    | - | 2.3  | -   | -   | -   | -   |
| AW985925  | Transmembrane protein 23 (Tmem23)                                  | - | 5.3  | -   | -   | -   | -   |
| AK002841  | Transmembrane protein 25 (Tmem25)                                  | - | -2.3 | -   | -   | -   | -   |
| BB469903  | Transmembrane protein 26 (Tmem26)                                  | - | -    | -   | -   | 2.3 | -   |
| AK017817  | Transmembrane protein 39a (Tmem35a)                                | - | 2.2  | -   | -   | -   | -   |
| BC004841  | Transmembrane protein 50B (Tmem50b)                                | - | 2.6  | -   | -   | -   | -   |
| BG070008  | Transmembrane protein 87B (Tmem87b)                                | - | 3.6  | -   | -   | -   | -   |
| AK004939  | Transmembrane serine protease 6 (Tmprss6)                          | - | -2.2 | -   | -   | -   | -   |
| AW048052  | Transporter 1, ATP-binding cassette, sub-family B (MDR/TAP) (Tap1) | - | 3.5  | -   | 3.5 | -   | -   |
| BE691515  | Transporter 2, ATP-binding cassette, sub-family B (MDR/TAP) (Tap2) | - | 2.1  | -   | -   | -   | -   |
| BB354684  | Tribbles homolog 2 (Trib2)                                         | - | 2.8  | -   | -   | -   | -   |
| NM_021406 | Triggering receptor expressed on myeloid cells 1 (Trem1)           | - | 2.3  | -   | 2.5 | -   | -   |
| BC010580  | Tripartite motif protein 21 (Trim21)                               | - | 2.3  | -   | -   | -   | -   |
| AF220019  | Tripartite motif protein 3 (Trim3)                                 | - | 2.7  | -   | -   | -   | -   |
| BM240719  | Tripartite motif protein 30 (Trim30)                               | - | 3.1  | -   | -   | -   | 2.1 |
| BB825733  | Tripartite motif protein 7 (Trim7)                                 | - | -2.7 | -   | -   | -   | -   |
| BB484264  | Tripeptidyl peptidase II (Tpp2)                                    | - | 2.6  | -   | -   | -   | -   |
| AV122663  | Tropomyosin 4 (Tpm4)                                               | - | 2.8  | -   | -   | -   | -   |
| NM_011619 | Troponin T2, cardiac (Tnnt2)                                       | - | 6.1  | -   | -   | -   | -   |
| AI528863  | Tryptophanyl-tRNA synthetase (Wars)                                | - | 4.7  | -   | 7   | -   | -   |
| BB045401  | TSC22 domain family 2 (Tsc22d2)                                    | - | 3.1  | -   | -   | -   | -   |
| NM_010286 | TSC22 domain family 3 (Tsc22d3)                                    | - | -    | 3.4 | 3.5 | -   | -   |
| BF228294  | TSR1, 20S rRNA accumulation, homolog (Tsr1)                        | - | 2.5  | -   | -   | -   | -   |
| BB795572  | Tubulin tyrosine ligase-like family, member 7 (Ttll7)              | - | 2.4  | -   | -   | -   | -   |
| NM_011653 | Tubulin, alpha 1 (Tuba1)                                           | - | 2.5  | -   | -   | -   | -   |
| AW491660  | Tubulin, alpha 4 (Tuba4)                                           | - | -2.1 | -   | -   | -   | -   |
| AA986082  | Tubulin, beta 2b (Tubb2b)                                          | - | -    | -   | -   | 2.2 | -   |
| BB187486  | Tumor necrosis factor (ligand) superfamily, member 10 (Tnfsf10)    | - | 2.3  | -   | -   | -   | -   |
| NM_009396 | Tumor necrosis factor, alpha-induced protein 2 (Tnfaip2)           | - | 2    | -   | 2.9 | -   | -   |
| BM241351  | Tumor necrosis factor, alpha-induced protein 3 (Tnfaip3)           | - | 15.4 | -   | 2.7 | -   | -   |
| NM_134131 | Tumor necrosis factor, alpha-induced protein 8 (Tnfaip8)           | - | 2    | -   | -   | -   | -   |
| BC002036  | Tumor protein D52 (Tpd52)                                          | - | 2    | -   | -   | -   | -   |
| BC005618  | Tumor-associated calcium signal transducer 1 (Tacstd1)             | - | 2.1  | -   | -   | -   | -   |
| AV241768  | Tumor-associated calcium signal transducer 2 (Tacstd2)             | - | 2.3  | -   | -   | -   | -   |
| BI904914  | Two pore channel 1 (Tpcn1)                                         | - | -2   | -   | -   | -   | -   |
| NM_011662 | TYRO protein tyrosine kinase binding protein (Tyrobp)              | - | 2.3  | -   | -   | -   | -   |

|           |                                                                                                   |   |      |     |      |      |     |
|-----------|---------------------------------------------------------------------------------------------------|---|------|-----|------|------|-----|
| NM_138721 | U7 snRNP-specific Sm-like protein LSM10 (Lsm10)                                                   | - | -2.6 | -   | -    | -    | -   |
| AK013437  | Ubiquitin specific peptidase 16 (Usp16)                                                           | - | 2    | -   | -    | -    | -   |
| BG076275  | Ubiquitin specific peptidase 53 (Usp53)                                                           | - | 2.8  | -   | -    | -    | -   |
| AI553394  | Ubiquitin specific protease 2 (Usp2)                                                              | 3 | -    | -   | -    | -    | -   |
| BB795733  | UDP-Gal:betaGlcNAc beta 1,3-galactosyltransferase, polypeptide 1 (B3galt1)                        | - | 19.8 | -   | -    | -    | -   |
| BF682223  | UDP-glucose ceramide glucosyltransferase (Ugcg)                                                   | - | 2.4  | -   | -    | -    | -   |
| AI788759  | UDP-glucose pyrophosphorylase 2 (Ugp2)                                                            | - | -3.7 | -   | -    | -    | -   |
| AV302406  | UDP-N-acetyl-alpha-D-galactosamine: polypeptide N-acetylgalactosaminyltransferase 7 (Galnt7)      | - | 2.3  | -   | -    | -    | -   |
| AV238718  | UDP-N-acetyl-alpha-D-galactosamine:polypeptide N-acetylgalactosaminyltransferase-like 4 (Galntl4) | - | 3.4  | -   | -    | -    | -   |
| AV220213  | Unc-45 homolog B (Unc45b)                                                                         | - | 2    | -   | -    | -    | -   |
| BC012697  | Uncoupling protein 2 (mitochondrial, proton carrier) (Ucp2)                                       | - | 2.9  | -   | -    | -    | -   |
| NM_009477 | Uridine phosphorylase 1 (Upp1)                                                                    | - | 3.2  | -   | 2.8  | -    | -   |
| BQ084786  | Uroplakin 3B (Upk3b)                                                                              | - | -    | -   | -    | -2.9 | -   |
| AI788797  | Utrophin (Utrn)                                                                                   | - | -    | -   | -2.2 | -    | -   |
| BB250384  | Vascular cell adhesion molecule 1 (Vcam1)                                                         | - | 3.6  | -   | -    | -    | -   |
| BC015289  | Vasodilator-stimulated phosphoprotein (Vasp)                                                      | - | 2.3  | -   | -    | -    | -   |
| BB530515  | Vasorin (Vasn)                                                                                    | - | 2.4  | -   | -    | -    | -   |
| BB552111  | Vesicle-associated membrane protein 3 (Vamp3)                                                     | - | -    | -   | -    | 2.3  | -   |
| BM119387  | Villin 2 (Vil2)                                                                                   | - | 4.8  | -   | -    | -    | -   |
| AV147875  | Vimentin (Vim)                                                                                    | - | 5    | -   | -    | -    | -   |
| BC022952  | v-maf musculoaponeurotic fibrosarcoma oncogene family, protein F (MafF)                           | - | 2.8  | 2.1 | 2.4  | -    | -   |
| BB212004  | Von Willebrand factor C and EGF domains (Vwce)                                                    | - | -2.3 | -   | -    | -    | -   |
| BB667216  | Von Willebrand factor homolog (Vwf)                                                               | - | 4.1  | -   | -    | -    | -   |
| AF334269  | WAP four-disulfide core domain 2 (Wfdc2)                                                          | - | 5.3  | -   | -    | -    | -   |
| C76969    | WAS/WASL interacting protein family, member 1 (Wipf1)                                             | - | 2.2  | -   | -    | -    | -   |
| NM_009516 | Wee 1 homolog (Wee1)                                                                              | 2 | -    | -   | -    | -    | -   |
| BC007478  | WW domain binding protein 5 (Wbp5)                                                                | - | 2.3  | -   | -    | -    | -   |
| BC014727  | WW domain containing transcription regulator 1 (Wwtr1)                                            | - | 2    | -   | -    | -    | -   |
| AV286265  | Xanthine dehydrogenase (Xdh)                                                                      | - | 3.5  | -   | 3.5  | -    | 2.8 |
| NM_013842 | X-box binding protein 1 (Xbp1)                                                                    | - | 2.2  | -   | -    | -    | -   |
| NM_021365 | X-linked lymphocyte-regulated 4B (Xlr4b)                                                          | - | 2.6  | -   | -    | -    | -   |
| BC003317  | Yip1 domain family, member 5 (Yipf5)                                                              | - | 2.2  | -   | -    | -    | -   |
| BB201861  | YOD1 OTU deubiquitinating enzyme 1 homologue (Yod1)                                               | - | 2.3  | -   | -    | -    | -   |
| NM_021394 | Z-DNA binding protein 1 (Zbp1)                                                                    | - | 2.5  | -   | 2.6  | -    | 2.5 |

|           |                                                   |    |      |   |     |     |   |
|-----------|---------------------------------------------------|----|------|---|-----|-----|---|
| BQ174973  | Zinc finger and BTB domain containing 16 (Zbtb16) | -  | 3.6  | - | 5.9 | -   | - |
| BC006817  | Zinc finger CCCH type containing 12A (Zc3h12a)    | -  | 4.3  | - | -   | -   | - |
| AW556219  | Zinc finger CCCH type containing 7 A (Zc3h7a)     | -  | 2.3  | - | -   | -   | - |
| BG075140  | Zinc finger protein 131 (Zfp131)                  | -  | 2.1  | - | -   | -   | - |
| X14678    | Zinc finger protein 36 (Zfp36)                    | -  | 2.5  | - | -   | -   | - |
| M58566    | Zinc finger protein 36, C3H type-like 1 (Zfp36l1) | -2 | -    | - | -   | -   | - |
| BE628275  | Zinc finger protein 467 (Zfp467)                  | -  | -2.3 | - | -   | -   | - |
| BB176857  | Zinc finger protein 53 (Zfp53)                    | -  | -    | - | -   | 2.5 | - |
| BB008902  | Zinc finger protein 9 (Zfp9)                      | -  | 2.4  | - | -   | -   | - |
| NM_134007 | Zinc finger, CDGSH-type domain 1 (Zcd1)           | -  | -2.6 | - | -   | -   | - |
| BC019521  | Zinc finger, FYVE domain containing 21 (Zfyve21)  | -  | -2.5 | - | -   | -   | - |
| BB561053  | Zinc finger, MYND domain containing 11 (Zmynd11)  | -  | -    | - | -   | 2   | - |

Fold-changes (FC) shown were statistically significant (i.e., Benjamini and Hochberg corrected p value <0.05 and absolute consistency across all replicate experiments). A negative sign before values indicates down-regulation. A dash “-“ indicates no statistical difference was observed.

**Supplementary Table III: KEGG pathways most significantly associated with genes altered in the livers of WT *Y. pestis*-infected mice at 48 hr post-infection.**

| KEGG Pathway                                         | Number of Genes |    |      |       | Z scores |       |
|------------------------------------------------------|-----------------|----|------|-------|----------|-------|
|                                                      | List            | Up | Down | Array | Up       | Down  |
| <b>Pathways Associated with Up-regulated Genes</b>   |                 |    |      |       |          |       |
| Cytokine-cytokine receptor interaction               | 49              | 47 | 2    | 218   | 7.74     | -2.1  |
| Leukocyte transendothelial migration                 | 25              | 25 | 0    | 111   | 5.82     | -2.01 |
| Jak-STAT signaling pathway                           | 24              | 21 | 3    | 135   | 4.33     | -1.59 |
| Toll-like receptor signaling pathway                 | 23              | 23 | 0    | 84    | 6.72     | -1.75 |
| Cell adhesion molecules (CAMs)                       | 23              | 22 | 1    | 120   | 4.33     | -1.59 |
| Focal adhesion                                       | 22              | 21 | 1    | 178   | 2        | -2.15 |
| Hematopoietic cell lineage                           | 17              | 17 | 0    | 79    | 4.55     | -1.69 |
| Apoptosis                                            | 16              | 16 | 0    | 81    | 4.02     | -1.71 |
| Natural killer cell mediated cytotoxicity            | 14              | 14 | 0    | 110   | 1.92     | -2.01 |
| T cell receptor signaling pathway                    | 13              | 13 | 0    | 93    | 2.22     | -1.84 |
| B cell receptor signaling pathway                    | 11              | 11 | 0    | 64    | 2.79     | -1.52 |
| Complement and coagulation cascades                  | 11              | 10 | 1    | 63    | 2.38     | -0.81 |
| <b>Pathways Associated with Down-regulated Genes</b> |                 |    |      |       |          |       |
| Insulin signaling pathway                            | 18              | 9  | 9    | 132   | -0.46    | 2.18  |
| Metabolism of xenobiotics by cytochrome P450         | 12              | 0  | 12   | 52    | -2.12    | 7.85  |
| Glycolysis/Gluconeogenesis                           | 11              | 6  | 5    | 54    | 0.89     | 2.38  |
| ABC transporters                                     | 10              | 3  | 7    | 40    | -0.09    | 4.92  |
| Arachidonic acid                                     | 10              | 3  | 7    | 65    | -0.98    | 3.29  |
| Tryptophan metabolism                                | 10              | 3  | 7    | 70    | -1.12    | 3.05  |

Pathways with Z scores values of 2 and greater are considered as significantly over-represented, and Z scores with values of -2 and lower are considered as significantly under-represented, compared to what would be expected by chance.



**Supplementary Table IV. Genes statistically differentially expressed in the livers of mice infected for 12 hr with a  $\Delta mpp$  mutant of *Y. pestis* CO92, compared to WT bacteria**

| GenBank ID | Gene Name                                                                     | Function                           | WT vs Mut         | C vs WT | C vs Mut |
|------------|-------------------------------------------------------------------------------|------------------------------------|-------------------|---------|----------|
|            |                                                                               |                                    | <i>Liver 12 h</i> |         |          |
|            |                                                                               |                                    | <i>FC</i>         |         |          |
| BG065457   | Aldolase 1, A isoform (Aldoa)                                                 | Glycolysis                         | 3.0               | -       | 4.0      |
| BB449248   | Apoptosis inhibitor 5 (Api5)                                                  | Transport; regulation of apoptosis | 3.0               | -       | 2.8      |
| X17013     | B subtilis lys gene for diaminopimelate decarboxylase (EC 4.1.1.20).          | Amino acid metabolism              | -4.3              | -       | -4.5     |
| X17013     | B subtilis lys gene for diaminopimelate decarboxylase (EC 4.1.1.20).          | Amino acid metabolism              | -6.2              | -       | -6.6     |
| X17013     | B subtilis lys gene for diaminopimelate decarboxylase (EC 4.1.1.20).          | Amino acid metabolism              | -6.7              | -       | -6.8     |
| X17013     | B subtilis lys gene for diaminopimelate decarboxylase (EC 4.1.1.20).          | Amino acid metabolism              | -7.0              | -       | -7.2     |
| X17013     | B subtilis lys gene for diaminopimelate decarboxylase (EC 4.1.1.20).          | Amino acid metabolism              | -7.5              | -       | -7.6     |
| X17013     | B subtilis lys gene for diaminopimelate decarboxylase (EC 4.1.1.20).          | Amino acid metabolism              | -10.5             | -       | -11.0    |
| X04603     | B. subtilis thrB and thrC genes for homoserine kinase and threonine synthase. | Amino acid metabolism              | -35.0             | -       | -35.8    |
| X04603     | B. subtilis thrB and thrC genes for homoserine kinase and threonine synthase. | Amino acid metabolism              | -36.9             | -       | -39.7    |
| X04603     | B. subtilis thrB and thrC genes for homoserine kinase and threonine synthase. | Amino acid metabolism              | -38.7             | -       | -39.7    |
| X04603     | B. subtilis thrB and thrC genes for homoserine kinase and threonine synthase. | Amino acid metabolism              | -50.3             | -       | -55.4    |

|        |                                                                                                                                                                                                                                            |                                                                                                                     |       |   |        |
|--------|--------------------------------------------------------------------------------------------------------------------------------------------------------------------------------------------------------------------------------------------|---------------------------------------------------------------------------------------------------------------------|-------|---|--------|
| X04603 | B. subtilis thrB and thrC genes for homoserine kinase and threonine synthase.                                                                                                                                                              | Amino acid metabolism                                                                                               | -51.9 | - | -53.7  |
| X04603 | B. subtilis thrB and thrC genes for homoserine kinase and threonine synthase.                                                                                                                                                              | Amino acid metabolism                                                                                               | -64.9 | - | -69.9  |
| K01391 | B.subtilis tryptophan (trp) operon, complete cds.                                                                                                                                                                                          | Amino acid metabolism                                                                                               | 25.9  | - | 25.9   |
| K01391 | B.subtilis tryptophan (trp) operon, complete cds.                                                                                                                                                                                          | Amino acid metabolism                                                                                               | 12.2  | - | 13.0   |
| K01391 | B.subtilis tryptophan (trp) operon, complete cds.                                                                                                                                                                                          | Amino acid metabolism                                                                                               | 7.8   | - | 7.7    |
| L38424 | Bacillus subtilis dihydropicolinate reductase (jojE) gene, complete cds; poly(A) polymerase (jojI) gene, complete cds; biotin acetyl-CoA-carboxylase ligase (birA) gene, complete cds; jojC, jojD, jojF, jojG, jojH genes, complete cds s. | Transcription regulation; protein modification; amino acid biosynthesis; RNA processing; methylglyoxal biosynthesis | -40.7 | - | -51.5  |
| L38424 | Bacillus subtilis dihydropicolinate reductase (jojE) gene, complete cds; poly(A) polymerase (jojI) gene, complete cds; biotin acetyl-CoA-carboxylase ligase (birA) gene, complete cds; jojC, jojD, jojF, jojG, jojH genes, complete cds s. | Transcription regulation; protein modification; amino acid biosynthesis; RNA processing; methylglyoxal biosynthesis | -71.7 | - | -89.8  |
| L38424 | Bacillus subtilis dihydropicolinate reductase (jojE) gene, complete cds; poly(A) polymerase (jojI) gene, complete cds; biotin acetyl-CoA-carboxylase ligase (birA) gene, complete cds; jojC, jojD, jojF, jojG, jojH genes, complete cds s. | Transcription regulation; protein modification; amino acid biosynthesis; RNA processing; methylglyoxal biosynthesis | -95.9 | - | -126.1 |
| L38424 | Bacillus subtilis dihydropicolinate reductase (jojE) gene, complete cds; poly(A) polymerase (jojI) gene, complete cds; biotin acetyl-CoA-carboxylase ligase (birA) gene, complete cds; jojC, jojD, jojF, jojG, jojH genes, complete cds s. | Transcription regulation; protein modification; amino acid biosynthesis; RNA processing; methylglyoxal biosynthesis | -97.8 | - | -119.3 |

|        |                                                                                                                                                                                                                                            |                                                                                                                     |        |   |        |
|--------|--------------------------------------------------------------------------------------------------------------------------------------------------------------------------------------------------------------------------------------------|---------------------------------------------------------------------------------------------------------------------|--------|---|--------|
| L38424 | Bacillus subtilis dihydropicolinate reductase (jojE) gene, complete cds; poly(A) polymerase (jojI) gene, complete cds; biotin acetyl-CoA-carboxylase ligase (birA) gene, complete cds; jojC, jojD, jojF, jojG, jojH genes, complete cds s. | Transcription regulation; protein modification; amino acid biosynthesis; RNA processing; methylglyoxal biosynthesis | -116.0 | - | -159.1 |
| L38424 | Bacillus subtilis dihydropicolinate reductase (jojE) gene, complete cds; poly(A) polymerase (jojI) gene, complete cds; biotin acetyl-CoA-carboxylase ligase (birA) gene, complete cds; jojC, jojD, jojF, jojG, jojH genes, complete cds s. | Transcription regulation; protein modification; amino acid biosynthesis; RNA processing; methylglyoxal biosynthesis | -167.8 | - | -226.1 |
| M24537 | Bacillus subtilis sporulation protein (spoOB), GTP-binding protein (obg), phenylalanine biosynthesis associated protein (pheB), and monofunctional prephenate dehydratase (pheA) genes, complete cds.                                      | Sporulation; response to stimulus; amino acid biosynthesis                                                          | -2.4   | - | -2.4   |
| M24537 | Bacillus subtilis sporulation protein (spoOB), GTP-binding protein (obg), phenylalanine biosynthesis associated protein (pheB), and monofunctional prephenate dehydratase (pheA) genes, complete cds.                                      | Sporulation; response to stimulus; amino acid biosynthesis                                                          | -3.3   | - | -3.4   |
| M24537 | Bacillus subtilis sporulation protein (spoOB), GTP-binding protein (obg), phenylalanine biosynthesis associated protein (pheB), and monofunctional prephenate dehydratase (pheA) genes, complete cds.                                      | Sporulation; response to stimulus; amino acid biosynthesis                                                          | -3.5   | - | -3.5   |

|          |                                                                                                                                                                                                       |                                                                |      |   |      |
|----------|-------------------------------------------------------------------------------------------------------------------------------------------------------------------------------------------------------|----------------------------------------------------------------|------|---|------|
| M24537   | Bacillus subtilis sporulation protein (spoOB), GTP-binding protein (obg), phenylalanine biosynthesis associated protein (pheB), and monofunctional prephenate dehydratase (pheA) genes, complete cds. | Sporulation; response to stimulus; amino acid biosynthesis     | -3.9 | - | -4.0 |
| M24537   | Bacillus subtilis sporulation protein (spoOB), GTP-binding protein (obg), phenylalanine biosynthesis associated protein (pheB), and monofunctional prephenate dehydratase (pheA) genes, complete cds. | Sporulation; response to stimulus; amino acid biosynthesis     | -4.2 | - | -4.1 |
| M24537   | Bacillus subtilis sporulation protein (spoOB), GTP-binding protein (obg), phenylalanine biosynthesis associated protein (pheB), and monofunctional prephenate dehydratase (pheA) genes, complete cds. | Sporulation; response to stimulus; amino acid biosynthesis     | -5.2 | - | -5.3 |
| BB213876 | Carbonic anhydrase 3 (Car3)                                                                                                                                                                           | One-carbon compound metabolism                                 | 2.7  | - | 3.3  |
| AK018466 | cDNA                                                                                                                                                                                                  | Unknown                                                        | -2.4 | - | -2.0 |
| C76675   | Ribosomal protein S6 (Rps6)                                                                                                                                                                           | Protein biosynthesis; ribosome biogenesis; glucose homeostasis | 3.0  | - | 3.6  |
| AK007282 | Seminal vesicle secretion 5 (Svs5)                                                                                                                                                                    | Hormone signaling                                              | -3.1 | - | -3.3 |

Fold-changes (FC) shown were statistically significant (i.e., Benjamini and Hochberg corrected p value <0.05 and absolute consistency across all replicate experiments). A negative sign before values indicates down-regulation. A dash “-“ indicates no statistical difference was observed. C = control (uninfected) mice; WT=wild-type *Y. pestis* CO92 infected mice; Mut= $\Delta lpp$  mutant of *Y. pestis* CO92 infected mice.

**Supplementary Table V. Genes statistically differentially expressed in the spleens of mice infected for 12 hr with a  $\Delta$ *mpp* mutant of *Y. pestis* CO92, compared to WT bacteria**

| GenBank ID                                                                                                             | Gene Name                                                | Function                                                                                               | WT vs Mut | C vs WT   | C vs Mut |
|------------------------------------------------------------------------------------------------------------------------|----------------------------------------------------------|--------------------------------------------------------------------------------------------------------|-----------|-----------|----------|
| <b><i>Up-regulated in WT-infected Mice Compared to Uninfected Control Animals) But NOT in Mutant-infected Mice</i></b> |                                                          |                                                                                                        |           |           |          |
|                                                                                                                        |                                                          |                                                                                                        |           | <i>FC</i> |          |
| BM237637                                                                                                               | Atpase, class VI, type 11C (Atp11c)                      | Cation transport; metabolism                                                                           | -2.4      | 2.1       | -        |
| AV316469                                                                                                               | cDNA                                                     | Unknown                                                                                                | -3.9      | 4.2       | -        |
| AI098139                                                                                                               | cDNA                                                     | Unknown                                                                                                | -2.7      | 2.3       | -        |
| BB229264                                                                                                               | cDNA                                                     | Unknown                                                                                                | -2.2      | 2.2       | -        |
| BB357590                                                                                                               | Cyclin D binding myb-like transcription factor 1 (Dmtf1) | Transcription regulation                                                                               | -2.8      | 2.7       | -        |
| BB167641                                                                                                               | Cyclin D3 (Ccnd3)                                        | Regulation of progression through cell cycle; signal transduction; T cell proliferation; cell division | -4.2      | 3.8       | -        |
| BE685667                                                                                                               | Cyclin D3 (Ccnd3)                                        | Regulation of progression through cell cycle; signal transduction; T cell proliferation; cell division | -3.8      | 3.9       | -        |
| BB043576                                                                                                               | Cyclin D3 (Ccnd3)                                        | Regulation of progression through cell cycle; signal transduction; T cell proliferation; cell division | -3.7      | 3.1       | -        |
| BB723867                                                                                                               | Dysferlin (Dysf)                                         | Plasma membrane repair                                                                                 | -1.9      | 2.1       | -        |
| NM_133753                                                                                                              | ERBB receptor feedback inhibitor 1 (Errfi1)              | Response to stress; stress-activated protein kinase signaling pathway                                  | -2.7      | 3.9       | -        |
| BG228765                                                                                                               | Jumonji domain containing 3 (Jmjd3)                      | Unknown                                                                                                | -2.0      | 2.2       | -        |
| AV309996                                                                                                               | Luc7 homolog ( <i>S. cerevisiae</i> )-like (Luc7l)       | Negative regulation of striated muscle development                                                     | -2.0      | 2.0       | -        |

|                                                                                                                            |                                                                 |                                                                                                                                                                 |      |      |   |
|----------------------------------------------------------------------------------------------------------------------------|-----------------------------------------------------------------|-----------------------------------------------------------------------------------------------------------------------------------------------------------------|------|------|---|
| BC027056                                                                                                                   | Microtubule-associated protein, RP/EB family, member 2 (Mapre2) | Cellular defense response; cell cycle; mitosis; signal transduction; cell proliferation/division                                                                | -2.6 | 2.0  | - |
| BB636266                                                                                                                   | Nemo like kinase (Nik)                                          | Transcription regulation; protein amino acid phosphorylation/autophosphorylation; protein kinase cascade; negative regulation of Wnt receptor signaling pathway | -2.3 | 2.1  | - |
| BB521034                                                                                                                   | Phosphomannomutase 2 (Pmm2)                                     | Protein amino acid N-linked glycosylation; metabolism; GDP-mannose biosynthesis; mannose biosynthesis                                                           | -2.6 | 2.5  | - |
| BB214530                                                                                                                   | Presenilin associated, rhomboid-like (Parl)                     | Serine-type endopeptidase activity                                                                                                                              | -3.5 | 2.5  | - |
| NM_013743                                                                                                                  | Pyruvate dehydrogenase kinase, isoenzyme 4 (Pdk4)               | Carbohydrate metabolism; glucose metabolism; acetyl-CoA biosynthesis from pyruvate                                                                              | -2.7 | 3.1  | - |
| BB469903                                                                                                                   | Transmembrane protein 26 (Tmem26)                               | Unknown                                                                                                                                                         | -2.3 | 2.3  | - |
| <b><i>Down-regulated in WT-infected Mice Compared to Uninfected Control Animals) But NOT in Mutant-infected Mice</i></b>   |                                                                 |                                                                                                                                                                 |      |      |   |
| AF402617                                                                                                                   | BCL2-antagonist/killer 1 (Bak1)                                 | Regulation of apoptosis; mitochondrial fusion; caspase activation via cytochrome c; response to fungus; response to mycotoxin                                   | 3.1  | -2.2 | - |
| NM_009743                                                                                                                  | Bcl2-like 1 (Bcl2l1)                                            | Response to radiation; regulation of apoptosis                                                                                                                  | 2.4  | -2.3 | - |
| NM_010438                                                                                                                  | Hexokinase 1 (Hk1)                                              | Glycolysis                                                                                                                                                      | 4.8  | -4.8 | - |
| BG063064                                                                                                                   | Tripartite motif protein 8 (Trim8)                              | Unknown                                                                                                                                                         | 3.6  | -3.0 | - |
| AA014267                                                                                                                   | Zinc finger protein, multitype 1 (Zfp1)                         | Transcription regulation; heart development                                                                                                                     | 5.2  | -4.3 | - |
| <b><i>Down-regulated in WT-infected Mice Compared to Uninfected Controls) But Up-regulated in Mutant-infected Mice</i></b> |                                                                 |                                                                                                                                                                 |      |      |   |

|                                                                                                                        |                                                                       |                                                                                |     |      |     |
|------------------------------------------------------------------------------------------------------------------------|-----------------------------------------------------------------------|--------------------------------------------------------------------------------|-----|------|-----|
| AY058908                                                                                                               | Anti-human CD37 antibody<br>WR17 kappa light chain<br>variable region | Immune functions                                                               | 4.0 | -2.4 | 1.6 |
| L41881                                                                                                                 | Immunoglobulin kappa chain<br>variable 28 (V28) (Igk-V28)             | Antigen processing and<br>presentation of peptide antigen via<br>MHC class I   | 3.8 | -1.8 | 2.1 |
| NM_009043                                                                                                              | Regenerating islet-derived 2<br>(Reg2)                                | Might act as an inhibitor of<br>spontaneous calcium carbonate<br>precipitation | 3.9 | -1.7 | 6.7 |
| <b><i>Up-regulated in Mutant-infected Mice Compared to Uninfected Control Animals) But NOT in WT-infected Mice</i></b> |                                                                       |                                                                                |     |      |     |
| BG141874                                                                                                               | Transthyretin (Ttr)                                                   | Thyroid hormone generation;<br>transport                                       | 3.1 |      | 3.2 |

Fold-changes (FC) shown were statistically significant (i.e., Benjamini and Hochberg corrected p value <0.05 and absolute consistency across all replicate experiments). A negative sign before values indicates down-regulation. A dash “-“ indicates no statistical difference was observed. C = control (uninfected) mice; WT=wild-type *Y. pestis* CO92 infected mice; Mut= $\Delta lpp$  mutant of *Y. pestis* CO92 infected mice.

**Supplementary Table VI. Genes statistically differentially expressed in the livers of mice infected for 48 hr with a  $\Delta$ *mpp* mutant of *Y. pestis* CO92, compared to WT bacteria**

| GenBank ID                                                      | Gene Name                                                                         | Function                                                                                                                                              | WT vs Mut | C vs WT | C vs Mut |
|-----------------------------------------------------------------|-----------------------------------------------------------------------------------|-------------------------------------------------------------------------------------------------------------------------------------------------------|-----------|---------|----------|
|                                                                 |                                                                                   |                                                                                                                                                       | <i>FC</i> |         |          |
| <b><i>Up-regulated in Both WT- and Mutant-infected Mice</i></b> |                                                                                   |                                                                                                                                                       |           |         |          |
| NM_009616                                                       | A disintegrin and metallopeptidase domain 19 (meltrin beta) (Adam19)              | Proteolysis; membrane protein ectodomain proteolysis; integrin-mediated signaling pathway; heart development                                          | 1.9       | 1.5     | 3.0      |
| AI649048                                                        | A kinase (PRKA) anchor protein 2 (Akap2)                                          | Actin filament organization; transmembrane receptor protein serine/threonine kinase signaling pathway; protein localization; regulation of cell shape | 1.9       | 6.4     | 12.0     |
| BC003735                                                        | A kinase (PRKA) anchor protein 2 (Akap2)                                          | Actin filament organization; transmembrane receptor protein serine/threonine kinase signaling pathway; protein localization; regulation of cell shape | 1.9       | 4.7     | 8.7      |
| NM_080575                                                       | Acyl-CoA synthetase short-chain family member 1 (Acss1)                           | Acetyl-CoA biosynthesis; metabolism                                                                                                                   | 2.6       | 1.8     | 4.6      |
| BB185861                                                        | Adaptor-related protein complex 1, sigma 2 subunit (Ap1s2)                        | Intracellular protein transport; receptor-mediated endocytosis                                                                                        | 1.9       | 2.6     | 5.0      |
| AK005223                                                        | Adaptor-related protein complex 1, sigma 2 subunit (Ap1s2)                        | Intracellular protein transport; receptor-mediated endocytosis                                                                                        | 1.9       | 2.0     | 3.7      |
| NM_024191                                                       | ADP-ribosylation factor-like 2 binding protein (Arl2bp)                           | Unknown                                                                                                                                               | 2         | 2.1     | 4.1      |
| AK006418                                                        | ADP-ribosylation factor-like 2 binding protein (Arl2bp)                           | Unknown                                                                                                                                               | 1.8       | 1.8     | 3.3      |
| BE570050                                                        | AHNAK nucleoprotein (desmoyokin) (Ahnak)                                          | Intracellular signaling cascade                                                                                                                       | 2.5       | 7.4     | 18.8     |
| AV256780                                                        | Ankyrin repeat domain 44 (Ankrd44)                                                | Transcription regulation                                                                                                                              | 2.2       | 2.3     | 5.1      |
| NM_030697                                                       | Ankyrin repeat domain 47 (Ankrd47)                                                | Unknown                                                                                                                                               | 2.4       | 1.7     | 4.1      |
| NM_007585                                                       | Annexin A2 (Anxa2)                                                                | Angiogenesis; collagen fibril organization; fibrinolysis                                                                                              | 1.8       | 3.6     | 6.3      |
| AW702161                                                        | Annexin A3 (Anxa3)                                                                | Signal transduction                                                                                                                                   | 2         | 6.6     | 13.0     |
| BE865094                                                        | Armadillo repeat containing, X-linked 4 (Armxc4)                                  | Proteolysis                                                                                                                                           | 2         | 2.6     | 5.3      |
| AW610650                                                        | ATPase, aminophospholipid transporter (APLT), class I, type 8A, member 1 (Atp8a1) | Cation transport                                                                                                                                      | 2.3       | 5.0     | 11.3     |



|           |                                                                                   |                                                                                                                                                                                                                                                                                                                                                  |     |      |      |
|-----------|-----------------------------------------------------------------------------------|--------------------------------------------------------------------------------------------------------------------------------------------------------------------------------------------------------------------------------------------------------------------------------------------------------------------------------------------------|-----|------|------|
| BB303874  | ATPase, aminophospholipid transporter (APLT), class I, type 8A, member 1 (Atp8a1) | Cation transport                                                                                                                                                                                                                                                                                                                                 | 1.9 | 4.0  | 7.4  |
| BQ176779  | ATPase, aminophospholipid transporter (APLT), class I, type 8A, member 1 (Atp8a1) | Cation transport                                                                                                                                                                                                                                                                                                                                 | 2.4 | 3.3  | 7.8  |
| AW610650  | ATPase, aminophospholipid transporter (APLT), class I, type 8A, member 1 (Atp8a1) | Cation transport                                                                                                                                                                                                                                                                                                                                 | 2.1 | 2.1  | 4.3  |
| NM_009052 | Brain expressed gene 1 (Bex1)                                                     | Positive regulation of neuroblast proliferation; nervous system development; negative regulation of neuron differentiation; nerve growth factor receptor signaling pathway                                                                                                                                                                       | 2.6 | 2.0  | 5.1  |
| AK010400  | Brain expressed gene 4 (Bex4)                                                     | Unknown                                                                                                                                                                                                                                                                                                                                          | 3.1 | 1.8  | 5.4  |
| BB039247  | CD93 antigen (Cd93)                                                               | Phagocytosis; defense response; cell adhesion; macrophage activation                                                                                                                                                                                                                                                                             | 2.5 | 4.4  | 11.1 |
| AV319144  | CD93 antigen (Cd93)                                                               | Phagocytosis; defense response; cell adhesion; macrophage activation                                                                                                                                                                                                                                                                             | 2.5 | 4.3  | 10.9 |
| BB479310  | CDC14 cell division cycle 14 homolog A (Cdc14a)                                   | Protein amino acid dephosphorylation; cell cycle; cell division                                                                                                                                                                                                                                                                                  | 2   | 1.7  | 3.4  |
| BB332449  | Ceruloplasmin (Cp)                                                                | Copper and iron transport and homeostasis                                                                                                                                                                                                                                                                                                        | 1.7 | 2.1  | 3.6  |
| AA210377  | Chloride intracellular channel 5 (Clic5)                                          | Chloride transport; pregnancy                                                                                                                                                                                                                                                                                                                    | 2.5 | 10.6 | 26.8 |
| NM_013805 | Claudin 5 (Cldn5)                                                                 | Calcium-independent cell-cell adhesion                                                                                                                                                                                                                                                                                                           | 2.8 | 2.6  | 7.3  |
| AV024285  | Coagulation factor II (thrombin) receptor (F2r)                                   | Regulation of progression through cell cycle; apoptosis; caspase activation; cell motility; G-protein coupled receptor protein signaling pathway; tyrosine phosphorylation of STAT protein; STAT protein nuclear translocation; blood coagulation; response to wounding; morphogenesis; positive regulation of I-kappaB kinase/NF-kappaB cascade | 1.8 | 2.7  | 5.1  |
| AW060797  | Coiled-coil domain containing 85A (Ccfdc85a)                                      | Unknown                                                                                                                                                                                                                                                                                                                                          | 3   | 3.5  | 10.2 |
| BB740218  | Coronin, actin binding protein 1A (Coro1a)                                        | Transport; cell motility; mitosis                                                                                                                                                                                                                                                                                                                | 1.9 | 2.9  | 5.4  |
| BB558800  | Cysteine-rich secretory protein LCCL domain containing 2 (Crispld2)               | Unknown                                                                                                                                                                                                                                                                                                                                          | 1.9 | 3.5  | 6.6  |

|           |                                                                |                                                                                                                                                                                                                                                                                                                                                                                                                                                                                    |     |     |      |
|-----------|----------------------------------------------------------------|------------------------------------------------------------------------------------------------------------------------------------------------------------------------------------------------------------------------------------------------------------------------------------------------------------------------------------------------------------------------------------------------------------------------------------------------------------------------------------|-----|-----|------|
| NM_007823 | Cytochrome P450, family 4, subfamily b, polypeptide 1 (Cyp4b1) | Arachidonic acid or fatty acid metabolism                                                                                                                                                                                                                                                                                                                                                                                                                                          | 2   | 3.2 | 6.5  |
| BB795072  | Dedicator of cytokinesis 9 (Dock9)                             | Guanyl nucleotide exchange factor activity                                                                                                                                                                                                                                                                                                                                                                                                                                         | 2   | 1.8 | 3.5  |
| NM_007876 | Dipeptidase 1 (renal) (Dpep1)                                  | Proteolysis                                                                                                                                                                                                                                                                                                                                                                                                                                                                        | 2.4 | 3.3 | 8.0  |
| NM_133838 | EH-domain containing 4 (Ehd4)                                  | Unknown                                                                                                                                                                                                                                                                                                                                                                                                                                                                            | 2.3 | 3.7 | 8.3  |
| BB229377  | Elastin (Eln)                                                  | Striated muscle development; respiratory gaseous exchange; circulation; cell proliferation; organ morphogenesis; regulation of actin filament polymerization; stress fiber formation                                                                                                                                                                                                                                                                                               | 2.4 | 1.7 | 4.0  |
| AF361882  | Endothelial cell-specific adhesion molecule (Esam1)            | Cell adhesion                                                                                                                                                                                                                                                                                                                                                                                                                                                                      | 1.9 | 2.3 | 4.3  |
| BC008277  | Endothelin receptor type A (Ednra)                             | Patterning of blood vessels; response to hypoxia; embryonic development; smooth muscle contraction; G-protein coupled receptor protein signaling pathway; adenylate cyclase activation; phospholipase C activation; elevation of cytosolic calcium ion concentration; heart development; respiratory gaseous exchange; blood pressure regulation; cell proliferation; neural crest cell development; glucose transport; negative regulation of cAMP biosynthesis; vasoconstriction | 2   | 2.4 | 4.7  |
| BG063148  | EST                                                            | Unknown                                                                                                                                                                                                                                                                                                                                                                                                                                                                            | 3   | 5.9 | 17.5 |
| BB522283  | EST                                                            | Unknown                                                                                                                                                                                                                                                                                                                                                                                                                                                                            | 2.1 | 3.8 | 7.9  |
| B1151331  | EST                                                            | Unknown                                                                                                                                                                                                                                                                                                                                                                                                                                                                            | 1.9 | 2.5 | 4.7  |
| NM_007993 | Fibrillin 1 (Fbn1)                                             | Chitin metabolism                                                                                                                                                                                                                                                                                                                                                                                                                                                                  | 2.1 | 2.6 | 5.4  |
| BM936480  | Flavin containing monooxygenase 2 (Fmo2)                       | Electron transport; oxygen and reactive oxygen species metabolism                                                                                                                                                                                                                                                                                                                                                                                                                  | 2.6 | 2.8 | 7.0  |
| BB437522  | Forkhead box F1a (Foxf1a)                                      | Vasculogenesis; transcription regulation; organ morphogenesis; extracellular matrix organization and biogenesis; lung and embryonic gut development; establishment of epithelial cell polarity                                                                                                                                                                                                                                                                                     | 2.7 | 2.4 | 6.4  |
| BB527078  | Furry homolog (Fry)                                            | Unknown                                                                                                                                                                                                                                                                                                                                                                                                                                                                            | 2   | 2.5 | 5.0  |
| BB083808  | G protein-coupled receptor 116 (Gpr116)                        | G-protein coupled receptor protein signaling pathway; neuropeptide signaling pathway                                                                                                                                                                                                                                                                                                                                                                                               | 2.6 | 3.3 | 8.5  |

|           |                                                           |                                                                                                                                                                                                                                                                                                                                                                  |     |     |      |
|-----------|-----------------------------------------------------------|------------------------------------------------------------------------------------------------------------------------------------------------------------------------------------------------------------------------------------------------------------------------------------------------------------------------------------------------------------------|-----|-----|------|
| NM_008122 | Gap junction membrane channel protein alpha 7 (Gja7)      | Transport; muscle contraction; intercellular junction assembly; cell-cell signaling; synaptic transmission; heart development; visual perception                                                                                                                                                                                                                 | 2   | 2.0 | 4.0  |
| U03561    | Heat shock protein 1 (Hspb1)                              | Protein folding; response to unfolded protein                                                                                                                                                                                                                                                                                                                    | 1.8 | 3.6 | 6.3  |
| NM_008344 | Insulin-like growth factor binding protein 6 (Igfbp6)     | Regulation of cell growth; signal transduction; negative regulation of cell proliferation                                                                                                                                                                                                                                                                        | 2.9 | 3.2 | 9.0  |
| NM_018826 | Iroquois related homeobox 5 (Irx5)                        | Transcription regulation; cell development                                                                                                                                                                                                                                                                                                                       | 2.1 | 1.5 | 3.2  |
| BC010337  | Keratin 7 (Krt7)                                          | Cytoskeleton organization and biogenesis                                                                                                                                                                                                                                                                                                                         | 2.2 | 6.6 | 14.4 |
| NM_008452 | Kruppel-like factor 2 (lung) (Kif21a)                     | Transcription regulation                                                                                                                                                                                                                                                                                                                                         | 2.2 | 2.8 | 5.9  |
| BG069413  | Kruppel-like factor 4 (gut) (Klf4)                        | Transcription regulation                                                                                                                                                                                                                                                                                                                                         | 2.6 | 2.4 | 6.4  |
| BG069413  | Kruppel-like factor 4 (gut) (Klf4)                        | Transcription regulation                                                                                                                                                                                                                                                                                                                                         | 2.9 | 6.7 | 19.2 |
| BG069607  | Kruppel-like factor 5 (Klf5)                              | Transcription regulation                                                                                                                                                                                                                                                                                                                                         | 2.3 | 1.8 | 4.1  |
| BB187947  | Leucine-rich repeat LGI family, member 3 (Lgi3)           | Unknown                                                                                                                                                                                                                                                                                                                                                          | 3.3 | 1.8 | 6.0  |
| AV293368  | Mcf.2 transforming sequence-like (Mcf2l)                  | Rho protein signal transduction                                                                                                                                                                                                                                                                                                                                  | 2.4 | 2.8 | 6.8  |
| AK010278  | Myosin, heavy polypeptide 14 (Myh14)                      | Regulation of cell shape; actin filament-based movement                                                                                                                                                                                                                                                                                                          | 2.3 | 1.6 | 3.6  |
| BB481540  | Myosin, heavy polypeptide 6, cardiac muscle, alpha (Myh6) | Embryonic development (sensu Mammalia); cardiac inotropy, chronotropy; striated muscle contraction; adult heart development; visceral muscle development; regulation of heart contraction; blood pressure regulation; actin filament-based movement; myofibril assembly; regulation of ATPase activity; sarcomere organization; cardiac muscle fiber development | 3.1 | 1.8 | 5.5  |
| AK020249  | Naked cuticle 1 homolog (Drosophila) (Nkd1)               | In the mouse, Nkd is a Dishevelled-binding protein that functions as a negative regulator of the Wnt-beta-catenin signaling pathway                                                                                                                                                                                                                              | 2.6 | 1.5 | 4.0  |
| BM121794  | Nebulette (Neb1)                                          | Ion transport                                                                                                                                                                                                                                                                                                                                                    | 2.3 | 7.5 | 17.0 |
| NM_010929 | Notch gene homolog 4 (Notch4)                             | Patterning of blood vessels; cell fate determination; morphogenesis of a branching structure; transcription regulation; Notch signaling pathway; embryonic development; hemopoiesis; cell differentiation; negative regulation of endothelial cell                                                                                                               | 2.5 | 2.5 | 6.2  |

|                      |                                                                        | differentiation                                                                                                                                                                                                                                                                                                                         |            |            |            |
|----------------------|------------------------------------------------------------------------|-----------------------------------------------------------------------------------------------------------------------------------------------------------------------------------------------------------------------------------------------------------------------------------------------------------------------------------------|------------|------------|------------|
| BC024556<br>BG072867 | PDZ and LIM domain 2 (Pdlim2)<br>Periaxin (Prx)                        | Unknown<br>Axon ensheathment                                                                                                                                                                                                                                                                                                            | 2.6<br>2.3 | 3.7<br>1.9 | 9.5<br>4.3 |
| NM_008903            | Phosphatidic acid phosphatase 2a (Ppap2a)                              | Protein amino acid dephosphorylation; diacylglycerol biosynthesis; sphingosine metabolism; ceramide metabolism; protein kinase C activation; negative regulation of cell proliferation; regulation of lipid metabolism; androgen receptor signaling pathway; phospholipid dephosphorylation; steroid hormone receptor signaling pathway | 2.1        | 2.1        | 4.3        |
| NM_011182            | Pleckstrin homology, Sec7 and coiled-coil domains 3 (Pscd3)            | Vesicle-mediated transport; regulation of ARF protein signal transduction; positive regulation of cell adhesion                                                                                                                                                                                                                         | 2.1        | 2.1        | 4.5        |
| NM_010329            | Podoplanin (Pdpn)                                                      | Lymphangiogenesis; water transport; amino acid transport; cell adhesion; development; regulation of cell shape; folic acid transport; lung development; positive regulation of cell migration; tube morphogenesis; positive regulation of cell motility; cell morphogenesis                                                             | 2.3        | 5.1        | 11.4       |
| BB533892             | Potassium inwardly-rectifying channel, subfamily J, member 15 (Kcnj15) | Potassium ion transport                                                                                                                                                                                                                                                                                                                 | 2.6        | 5.3        | 13.8       |
| AV366831             | Procollagen, type IV, alpha 3 (Col4a3)                                 | Phosphate transport; induction of apoptosis; caspase activation; cell adhesion; cell surface receptor linked signal transduction; cell proliferation; negative regulation of angiogenesis                                                                                                                                               | 2.5        | 3.7        | 9.2        |
| BB164509             | Proline rich Gla (G-carboxyglutamic acid) 3 (transmembrane) (Prrg3)    | Unknown                                                                                                                                                                                                                                                                                                                                 | 2.1        | 1.9        | 4.0        |
| AK009847             | Protease, serine, 23 (Prss23)                                          | Proteolysis                                                                                                                                                                                                                                                                                                                             | 2.1        | 4.6        | 9.8        |

|           |                                                                                                  |                                                                                                                                                                                   |     |     |      |
|-----------|--------------------------------------------------------------------------------------------------|-----------------------------------------------------------------------------------------------------------------------------------------------------------------------------------|-----|-----|------|
| AV297026  | Protein kinase C, mu (Prkcm)                                                                     | Protein amino acid phosphorylation; intracellular signaling cascade                                                                                                               | 2.6 | 1.7 | 4.4  |
| BB216074  | Protein kinase, cAMP dependent regulatory, type II beta (Prkar2b)                                | Protein amino acid phosphorylation; fatty acid metabolism; intracellular signaling cascade; learning; cell proliferation; organ morphogenesis; protein amino acid phosphorylation | 2.1 | 1.6 | 3.3  |
| BB823350  | Protein kinase, cGMP-dependent, type II (Prkg2)                                                  | Regulation of progression through cell cycle; protein amino acid phosphorylation; signal transduction                                                                             | 2.4 | 2.0 | 4.7  |
| NM_133685 | RAB31, member RAS oncogene family (Rab31)                                                        | Intracellular protein transport; small GTPase mediated signal transduction                                                                                                        | 1.6 | 1.6 | 2.7  |
| AF146523  | Receptor (calcitonin) activity modifying protein 2 (Ramp2)                                       | Intracellular protein transport; receptor-mediated endocytosis; regulation of G-protein coupled receptor protein signaling pathway                                                | 2.3 | 2.7 | 6.1  |
| NM_022886 | Sciellin (Scel)                                                                                  | Epidermis development; embryonic development; keratinocyte differentiation                                                                                                        | 4.4 | 3.5 | 15.1 |
| NM_009151 | Selectin, platelet (p-selectin) ligand (Selpl)                                                   | Cell adhesion                                                                                                                                                                     | 1.7 | 1.6 | 2.7  |
| AF080090  | Sema domain, immunoglobulin domain (Ig), short basic domain, secreted, (semaphorin) 3 F (Sema3f) | Neural crest cell migration; development; negative regulation of axon extension involved in axon guidance; negative chemotaxis                                                    | 2.2 | 2.4 | 5.2  |
| BM114815  | SET domain containing (lysine methyltransferase) 7 (Setd7)                                       | Chromatin modification                                                                                                                                                            | 1.8 | 1.8 | 3.2  |
| NM_015756 | Shroom family member 3 (Shroom3)                                                                 | Cell morphogenesis; pattern specification; cellular pigment accumulation; apical protein localization                                                                             | 1.9 | 2.1 | 4.1  |
| NM_011326 | Sodium channel, nonvoltage-gated 1 gamma (Scnn1g)                                                | Sodium ion transport; excretion; response to stimulus                                                                                                                             | 2   | 2.9 | 5.6  |
| BM237089  | Solute carrier organic anion transporter family, member 3a1 (Slco3a1)                            | Ion transport                                                                                                                                                                     | 2   | 2.7 | 5.4  |
| BB827631  | Spectrin domain with coiled-coils 1 (Specc1)                                                     | Muscle contraction                                                                                                                                                                | 1.9 | 1.5 | 3.0  |
| BG060909  | Stearoyl-Coenzyme A desaturase 2 (Scd2)                                                          | Lipid metabolism; fatty acid biosynthesis; superoxide metabolism                                                                                                                  | 2.6 | 6.5 | 16.9 |
| AW555571  | TAF9B RNA polymerase II, TATA box binding protein (TBP)-associated factor (Taf9b)                | Transcription initiation; regulation of transcription                                                                                                                             | 2.1 | 2.0 | 4.1  |

|                                                                   |                                                                                                  |                                                                                                 |      |      |      |
|-------------------------------------------------------------------|--------------------------------------------------------------------------------------------------|-------------------------------------------------------------------------------------------------|------|------|------|
| NM_027884                                                         | Tensin 1 (Tns1)                                                                                  | Cell-substrate junction assembly; intracellular signaling cascade; cell migration               | 1.9  | 1.7  | 3.2  |
| BC007185                                                          | Tetraspanin 2 (Tspan2)                                                                           | Cell motility; cell adhesion; cell proliferation                                                | 2.5  | 3.0  | 7.4  |
| BI111620                                                          | Tissue inhibitor of metalloproteinase 3 (Timp3)                                                  | Transmembrane receptor protein tyrosine kinase signaling pathway                                | 2    | 6.6  | 12.9 |
| BI111620                                                          | Tissue inhibitor of metalloproteinase 3 (Timp3)                                                  | Transmembrane receptor protein tyrosine kinase signaling pathway                                | 1.9  | 6.6  | 12.5 |
| AI639846                                                          | Transcription factor 4 (Tcf4)                                                                    | Transcription regulation                                                                        | 1.7  | 1.8  | 3.1  |
| BB354684                                                          | Tribbles homolog 2 (Trib2)                                                                       | Protein amino acid phosphorylation; regulation of MAPK activity                                 | 2.5  | 2.8  | 7.0  |
| BC005618                                                          | Tumor-associated calcium signal transducer 1 (Tacstd1)                                           | Defense response                                                                                | 2    | 2.1  | 4.1  |
| AV238718                                                          | UDP-N-acetyl-alpha-D-galactosamine:polypeptide N-acetylgalactosaminyltransferase-like 4 (Galnt4) | Unknown                                                                                         | 2.1  | 3.4  | 7.2  |
| BC012697                                                          | Uncoupling protein 2 (mitochondrial, proton carrier) (Ucp2)                                      | Mitochondrial transport; proton transport                                                       | 1.9  | 2.9  | 5.6  |
| NM_011979                                                         | Vanin 3 (Vnn3)                                                                                   | Nitrogen compound metabolism                                                                    | 3.4  | 1.8  | 6.3  |
| BC021433                                                          | cDNA                                                                                             | Unknown                                                                                         | 1.8  | 25.1 | 44.4 |
| BF682848                                                          | cDNA                                                                                             | Unknown                                                                                         | 2.8  | 9.9  | 27.1 |
| BM218877                                                          | cDNA                                                                                             | Unknown                                                                                         | 3.2  | 3.7  | 11.9 |
| AK004276                                                          | cDNA                                                                                             | Unknown                                                                                         | 1.9  | 3.3  | 6.4  |
| BB322233                                                          | cDNA                                                                                             | Unknown                                                                                         | 2.7  | 3.0  | 8.0  |
| BB353853                                                          | cDNA                                                                                             | Unknown                                                                                         | 2.1  | 2.7  | 5.7  |
| BB534298                                                          | cDNA                                                                                             | Unknown                                                                                         | 2.7  | 2.6  | 7.0  |
| BC022950                                                          | cDNA                                                                                             | Unknown                                                                                         | 2.2  | 2.4  | 5.3  |
| AK017241                                                          | cDNA                                                                                             | Unknown                                                                                         | 2.4  | 1.7  | 4.0  |
| <b><i>Down-regulated in Both WT- and Mutant-infected Mice</i></b> |                                                                                                  |                                                                                                 |      |      |      |
| BE952632                                                          | 2-4-dienoyl-Coenzyme A reductase 2, peroxisomal (decr2)                                          | Peroxisome organization and biogenesis; metabolism                                              | -2.9 | -2.5 | -7.2 |
| AK002295                                                          | 3-hydroxyanthranilate 3,4-dioxygenase (Haa)                                                      | Metabolism                                                                                      | -3   | -1.8 | -5.5 |
| BF462185                                                          | 4-aminobutyrate aminotransferase (Abat)                                                          | Gamma-aminobutyric acid metabolism; neurotransmitter catabolism; behavioral response to cocaine | -2.6 | -2.3 | -5.8 |
| BC013343                                                          | 4-hydroxyphenylpyruvic acid dioxygenase (Hpd)                                                    | L-phenylalanine catabolism; tyrosine catabolism; aromatic amino acid family metabolism          | -2.3 | -1.8 | -4.1 |
| BC010837                                                          | 4-nitrophenylphosphatase domain and non-neuronal SNAP25-like protein homolog 1 (ipsnap1)         | Unknown                                                                                         | -3.3 | -2.5 | -8.3 |

|           |                                                                                           |                                                                                                                                                                                                 |       |      |       |
|-----------|-------------------------------------------------------------------------------------------|-------------------------------------------------------------------------------------------------------------------------------------------------------------------------------------------------|-------|------|-------|
| AV306253  | 4-nitrophenylphosphatase domain and non-neuronal SNAP25-like protein homolog 1 (ipsnap1)  | Unknown                                                                                                                                                                                         | -3.1  | -3.2 | -10.1 |
| BB718075  | Acetyl-Coenzyme A acyltransferase 2 (mitochondrial 3-oxoacyl-Coenzyme A thiolase) (Acaa2) | Lipid metabolism; fatty acid metabolism; cholesterol biosynthesis                                                                                                                               | -2.2  | -1.6 | -3.5  |
| AB078618  | Acyl-CoA thioesterase 12 (Acot12)                                                         | Acetyl-CoA metabolism; lipid metabolism; fatty acid metabolism                                                                                                                                  | -2.1  | -3.2 | -6.7  |
| NM_016702 | Alanine-glyoxylate aminotransferase (Agxt)                                                | Protein targeting to peroxisome; glyoxylate metabolism                                                                                                                                          | -2.6  | -2.4 | -6.1  |
| BC013477  | Alcohol dehydrogenase 1 (class I) (Adh1)                                                  | Retinoid metabolism                                                                                                                                                                             | -4    | -2.0 | -7.9  |
| BB282093  | Aldehyde dehydrogenase 4 family, member A1 (Aldh4a1)                                      | Proline metabolism                                                                                                                                                                              | -3.7  | -2.3 | -8.4  |
| BC021607  | Aldo-keto reductase family 1, member C20 (Akr1c20)                                        | Steroid biosynthesis                                                                                                                                                                            | -6    | -2.7 | -15.8 |
| NM_030611 | Aldo-keto reductase family 1, member C6 (Akr1c6)                                          | Steroid biosynthesis                                                                                                                                                                            | -6.8  | -2.0 | -13.3 |
| AI891467  | Aldo-keto reductase family 1, member D1 (Akr1d1)                                          | Electron transport; lipid metabolism; bile acid metabolism; cholesterol catabolism; digestion; C21-steroid hormone metabolism; androgen metabolism                                              | -11.6 | -3.3 | -38.0 |
| AK005066  | Amidohydrolase domain containing 1 (Amdhd1)                                               | Histidine catabolism to glutamate and formamide                                                                                                                                                 | -2.9  | -3.5 | -10.4 |
| BB797326  | Amidohydrolase domain containing 1 (Amdhd1)                                               | Histidine catabolism to glutamate and formamide                                                                                                                                                 | -4.2  | -2.5 | -10.5 |
| BC025904  | Angiopoietin-like 6 (Angptl6)                                                             | Angiogenesis; signal transduction; development; cell differentiation                                                                                                                            | -1.7  | -2.1 | -3.7  |
| D49729    | Arginine vasopressin receptor 1A (Avpr1a)                                                 | Generation of precursor metabolites and energy; G-protein coupled receptor protein signaling pathway; phospholipase C activation; elevation of cytosolic calcium ion concentration; circulation | -2    | -1.7 | -3.4  |
| NM_007494 | Argininosuccinate synthetase 1 (Ass1)                                                     | Urea cycle; arginine biosynthesis; amino acid biosynthesis                                                                                                                                      | -2.9  | -1.5 | -4.4  |
| NM_023383 | Arylacetamide deacetylase (esterase) (Aadac)                                              | Metabolism                                                                                                                                                                                      | -2.5  | -1.5 | -3.9  |
| AK004030  | Arylformamidase (Afmid)                                                                   | Tryptophan catabolism to kynurenine                                                                                                                                                             | -3.2  | -3.7 | -11.6 |
| NM_027857 | Aspartoacylase (aminoacylase) 3 (Acy3)                                                    | Metabolism                                                                                                                                                                                      | -2.2  | -4.6 | -10.0 |
| NM_021022 | ATP-binding cassette, sub-family B (MDR/TAP), member (Abcb11)                             | Transport                                                                                                                                                                                       | -6    | -1.9 | -11.3 |

|           |                                                                  |                                                                                                              |       |      |       |
|-----------|------------------------------------------------------------------|--------------------------------------------------------------------------------------------------------------|-------|------|-------|
| NM_031884 | ATP-binding cassette, sub-family G (WHITE), member 5 (Abcg5)     | Transport; cholesterol absorption                                                                            | -2.4  | -4.2 | -10.1 |
| BC022107  | Cadherin 2 (Cdh2)                                                | Cell adhesion; calcium-dependent cell-cell adhesion; cell migration; blood vessel morphogenesis              | -2    | -1.9 | -3.7  |
| BC022107  | Cadherin 2 (Cdh2)                                                | Cell adhesion; calcium-dependent cell-cell adhesion; cell migration; blood vessel morphogenesis              | -2.1  | -1.9 | -4.0  |
| NM_007606 | Carbonic anhydrase 3 (Car3)                                      | One-carbon compound metabolism                                                                               | -13.2 | -2.4 | -31.3 |
| NM_007606 | Carbonic anhydrase 3 (Car3)                                      | One-carbon compound metabolism                                                                               | -10.9 | -4.3 | -46.2 |
| NM_021456 | Carboxylesterase 1 (Ces1)                                        | Detoxification of xenobiotics; activation of ester and amide prodrugs; response to toxin                     | -5.1  | -2.3 | -11.7 |
| NM_009900 | Chloride channel 2 (Clcn2)                                       | Chloride transport                                                                                           | -2.4  | -2.2 | -5.3  |
| NM_031164 | Coagulation factor XIII, beta subunit (F13b)                     | Blood coagulation                                                                                            | -2.3  | -1.6 | -3.8  |
| BB765132  | Collectin sub-family member 10 (Colec10)                         | Phosphate transport; defense response; cell adhesion; embryonic development                                  | -3.9  | -1.7 | -6.9  |
| AF173379  | Copper chaperone for superoxide dismutase (Ccs)                  | Protein folding; superoxide metabolism; copper ion transport; positive regulation of oxidoreductase activity | -2    | -1.9 | -3.8  |
| NM_010000 | Cytochrome P450, family 2, subfamily b, polypeptide 9 (Cyp2b9)   | Electron transport                                                                                           | -7.2  | -3.4 | -24.5 |
| BC025819  | Cytochrome P450, family 2, subfamily c, polypeptide 44 (Cyp2c44) | Drug and steroid metabolism                                                                                  | -4.8  | -2.7 | -13.0 |
| BC010989  | Cytochrome P450, family 2, subfamily d, polypeptide 10 (Cyp2d10) | Electron transport                                                                                           | -1.7  | -1.6 | -2.8  |
| BF783609  | Cytochrome P450, family 2, subfamily j, polypeptide 5 (Cyp2j5)   | Electron transport                                                                                           | -3.2  | -2.0 | -6.2  |
| NM_134144 | Cytochrome P450, family 2, subfamily c, polypeptide 37 (Cyp2c37) | Electron transport                                                                                           | -4.3  | -1.5 | -6.6  |
| NM_007820 | Cytochrome P450, family 3, subfamily a, polypeptide 16 (Cyp3a16) | Electron transport                                                                                           | -7.5  | -1.7 | -12.5 |
| BC011228  | Cytochrome P450, family 4, subfamily f, polypeptide 14 (Cyp4f14) | Arachidonic acid or fatty acid metabolism                                                                    | -7.8  | -4.5 | -35.1 |
| C79957    | Desmoglein 2 (Dsg2)                                              | Cell adhesion                                                                                                | -1.9  | -1.9 | -3.6  |
| AW490997  | Dihydropyrimidinase (Dpys)                                       | Nucleobase, nucleoside, nucleotide and nucleic acid metabolism; response to toxin                            | -6.1  | -4.1 | -25.0 |



|           |                                                                             |                                                                                                                                                                                |       |       |        |
|-----------|-----------------------------------------------------------------------------|--------------------------------------------------------------------------------------------------------------------------------------------------------------------------------|-------|-------|--------|
| AK004899  | Dihydropyrimidinase (Dpys)                                                  | Nucleobase, nucleoside, nucleotide and nucleic acid metabolism; response to toxin                                                                                              | -8.1  | -3.3  | -26.6  |
| NM_023737 | Enoyl-Coenzyme A, hydratase/3-hydroxyacyl Coenzyme A dehydrogenase (Ehhadh) | Generation of precursor metabolites and energy; lipid metabolism; fatty acid beta-oxidation; acyl-CoA metabolism                                                               | -4.7  | -2.6  | -12.0  |
| BB667477  | EST                                                                         | Unknown                                                                                                                                                                        | -4.7  | -3.6  | -16.8  |
| AF055573  | Fragile histidine triad gene (Fhit)                                         | DNA replication; nucleotide metabolism                                                                                                                                         | -2.1  | -1.7  | -3.6   |
| BC011139  | Glucokinase (Gck)                                                           | Glucose metabolism and homeostasis; glycolysis; NADP metabolism; positive regulation of insulin secretion; regulation of potassium ion transport; carbohydrate phosphorylation | -3.8  | -2.4  | -9.1   |
| NM_026672 | Glutathione S-transferase, mu 7 (Gstm7)                                     | Metabolism                                                                                                                                                                     | -2.6  | -2.4  | -6.0   |
| NM_008156 | Glycosylphosphatidylinositol specific phospholipase D1 (Gpld1)              | GPI anchor release                                                                                                                                                             | -2.2  | -2.6  | -5.9   |
| AF015887  | Guanidinoacetate methyltransferase (Gamt)                                   | Creatine biosynthesis; muscle contraction; spermatogenesis; organ morphogenesis; regulation of body size                                                                       | -6.3  | -4.0  | -25.2  |
| BC019856  | Gulonolactone (L-) oxidase (Gulo)                                           | Electron transport; L-ascorbic acid biosynthesis                                                                                                                               | -3.4  | -2.8  | -9.4   |
| NM_019545 | Hydroxyacid oxidase (glycolate oxidase) 3 (Hao3)                            | Fatty acid alpha-oxidation; electron transport; protein targeting; fatty acid metabolism                                                                                       | -17.6 | -10.0 | -175.3 |
| BC026555  | Kallikrein B, plasma 1 (Klkb1)                                              | Proteolysis; inflammatory response; blood coagulation; fibrinolysis                                                                                                            | -3.7  | -4.2  | -15.4  |
| NM_029550 | Kidney expressed gene 1 (Keg1)                                              | Regulation of progression through cell cycle                                                                                                                                   | -3.9  | -6.7  | -26.1  |
| BE691552  | Lactamase, beta 2 (Lactb2)                                                  | Metabolism                                                                                                                                                                     | -2.3  | -1.8  | -4.2   |
| AI848705  | Lin-7 homolog A (Lin7a)                                                     | Protein complex assembly; exocytosis; neurotransmitter secretion; synaptic vesicle transport                                                                                   | -2.2  | -2.8  | -6.3   |
| AV287586  | Lin-7 homolog A (Lin7a)                                                     | Protein complex assembly; exocytosis; neurotransmitter secretion; synaptic vesicle transport                                                                                   | -2.6  | -2.6  | -6.8   |
| NM_008280 | Lipase, hepatic (Lipc)                                                      | Protein amino acid N-linked glycosylation; lipid metabolism                                                                                                                    | -2.8  | -1.9  | -5.4   |
| BC013893  | Mannan-binding lectin serine peptidase 2 (Masp2)                            | Proteolysis; innate immune response; complement activation, classical pathway; cell adhesion; antimicrobial humoral response (sensu                                            | -2.1  | -1.6  | -3.2   |

|           |                                                                     | Vertebrata)                                                                                                                                                                                                                                                                             |      |      |       |
|-----------|---------------------------------------------------------------------|-----------------------------------------------------------------------------------------------------------------------------------------------------------------------------------------------------------------------------------------------------------------------------------------|------|------|-------|
| BC020153  | Nitrilase family, member 2 (Nit2)                                   | Nitrogen compound metabolism                                                                                                                                                                                                                                                            | -4.4 | -3.0 | -13.2 |
| NM_013864 | N-myc downstream regulated gene 2 (NdrG2)                           | Nervous system development; cell differentiation                                                                                                                                                                                                                                        | -2.2 | -1.7 | -3.7  |
| AK011172  | Nudix (nucleoside diphosphate linked moiety X)-type motif 7 (Nudt7) | Coenzyme A catabolism; acetyl-CoA catabolism                                                                                                                                                                                                                                            | -2.1 | -2.8 | -6.0  |
| AI786408  | Ornithine transcarbamylase (Otc)                                    | Urea cycle; amino acid metabolism; arginine biosynthesis                                                                                                                                                                                                                                | -2.7 | -1.5 | -4.1  |
| BC023496  | Pantothenate kinase 1 (Pank1)                                       | Coenzyme A biosynthesis                                                                                                                                                                                                                                                                 | -4.4 | -1.7 | -7.7  |
| NM_023523 | Peroxisomal trans-2-enoyl-CoA reductase (Pecr)                      | Fatty acid biosynthesis; metabolism; lipid biosynthesis; fatty acid elongation                                                                                                                                                                                                          | -2.1 | -1.7 | -3.5  |
| BC019997  | Phenazine biosynthesis-like protein domain containing (Pbld)        | Interacts with unrip/mawd; Oxidoreductase activity                                                                                                                                                                                                                                      | -3.6 | -3.2 | -11.4 |
| AW106920  | Phenylalanine hydroxylase (Pah)                                     | L-phenylalanine catabolism; aromatic amino acid family metabolism                                                                                                                                                                                                                       | -8.7 | -2.7 | -23.7 |
| BC013525  | Pipecolic acid oxidase (Pipox)                                      | Electron transport; peroxisome organization and biogenesis; tetrahydrofolate metabolism                                                                                                                                                                                                 | -2.8 | -2.1 | -5.8  |
| NM_008932 | Prolactin receptor (Prlr)                                           | Steroid biosynthesis; anti-apoptosis; transmembrane receptor protein tyrosine kinase activation (dimerization); embryo implantation; lactation; regulation of cell adhesion; regulation of epithelial cell differentiation; T cell activation; tyrosine phosphorylation of JAK2 protein | -3.3 | -2.7 | -8.7  |
| NM_008932 | Prolactin receptor (Prlr)                                           | Steroid biosynthesis; anti-apoptosis; transmembrane receptor protein tyrosine kinase activation (dimerization); embryo implantation; lactation; regulation of cell adhesion; regulation of epithelial cell differentiation; T cell activation; tyrosine phosphorylation of JAK2 protein | -4.4 | -2.7 | -12.0 |

|           |                                                                                                         |                                                                                                                                                                                                                                                                                        |      |      |       |
|-----------|---------------------------------------------------------------------------------------------------------|----------------------------------------------------------------------------------------------------------------------------------------------------------------------------------------------------------------------------------------------------------------------------------------|------|------|-------|
| M22958    | Prolactin receptor (Prlr)                                                                               | Steroid biosynthesis; anti-apoptosis; transmembrane receptor protein tyrosine kinase activation (dimerization); embryo implantation lactation; regulation of cell adhesion; regulation of epithelial cell differentiation; T cell activation; tyrosine phosphorylation of JAK2 protein | -4.5 | -3.0 | -13.7 |
| AK011039  | Proline dehydrogenase (oxidase) 2 (Prodh2)                                                              | Glutamate biosynthesis; proline metabolism                                                                                                                                                                                                                                             | -2.7 | -2.0 | -5.4  |
| BC024104  | Protein Z, vitamin K-dependent plasma glycoprotein (Proz)                                               | Proteolysis; blood coagulation                                                                                                                                                                                                                                                         | -1.9 | -1.6 | -2.9  |
| BB667651  | Pyruvate kinase liver and red blood cell (Pklr)                                                         | Glycolysis; response to other organism                                                                                                                                                                                                                                                 | -2   | -2.7 | -5.3  |
| NM_009040 | Retinol dehydrogenase 16 (Rdh16)                                                                        | Metabolism                                                                                                                                                                                                                                                                             | -4.6 | -2.9 | -13.5 |
| BI217574  | Sarcosine dehydrogenase (Sardh)                                                                         | Electron transport; glycine catabolism                                                                                                                                                                                                                                                 | -2.7 | -2.6 | -7.0  |
| NM_029269 | Secreted phosphoprotein 2 (Spp2)                                                                        | Skeletal development; bone remodeling                                                                                                                                                                                                                                                  | -2.1 | -1.9 | -3.9  |
| AF237702  | Serine hydroxymethyl transferase 1 (soluble) (Shmt1)                                                    | Glycine metabolism; L-serine metabolism; one-carbon compound metabolism                                                                                                                                                                                                                | -3.1 | -2.7 | -8.5  |
| NM_009171 | Serine hydroxymethyl transferase 1 (soluble) (Shmt1)                                                    | Glycine metabolism; L-serine metabolism; one-carbon compound metabolism                                                                                                                                                                                                                | -3.5 | -2.9 | -10.0 |
| BC021154  | Solute carrier family 10 (sodium/bile acid cotransporter family), member 1 (Slc10a1)                    | Sodium ion transport; organic anion transport                                                                                                                                                                                                                                          | -5   | -2.2 | -11.0 |
| NM_011387 | Solute carrier family 10 (sodium/bile acid cotransporter family), member 1 (Slc10a1)                    | Sodium ion transport; organic anion transport                                                                                                                                                                                                                                          | -5.1 | -2.3 | -11.7 |
| AV220703  | Solute carrier family 16 (monocarboxylic acid transporters), member 12 (Slc16a12)                       | Proton-linked monocarboxylate transport                                                                                                                                                                                                                                                | -2.7 | -2.0 | -5.4  |
| NM_031197 | Solute carrier family 2 (facilitated glucose transporter), member 2 (Slc2a2)                            | Carbohydrate metabolism; carbohydrate transport; glucose transport                                                                                                                                                                                                                     | -9.4 | -2.1 | -19.7 |
| AA276202  | Solute carrier family 23 (nucleobase transporters), member 1 (Slc23a1)                                  | Sodium ion transport                                                                                                                                                                                                                                                                   | -2.2 | -1.5 | -3.3  |
| BC016571  | Solute carrier family 25 (mitochondrial carrier, adenine nucleotide translocator), member 13 (Slc25a13) | Aspartate transport                                                                                                                                                                                                                                                                    | -2.3 | -2.0 | -4.5  |
| NM_025877 | Solute carrier family 25 (mitochondrial carrier; phosphate carrier), member 23 (Slc25a23)               | Transport                                                                                                                                                                                                                                                                              | -2.2 | -2.9 | -6.3  |

|                                                                        |                                                                                   |                                                                                                                            |      |      |       |
|------------------------------------------------------------------------|-----------------------------------------------------------------------------------|----------------------------------------------------------------------------------------------------------------------------|------|------|-------|
| BC022130                                                               | Solute carrier family 26 (sulfate transporter), member 1 (Slc26a1)                | Chloride, sulfate, and oxalate transport                                                                                   | -2.7 | -3.4 | -9.3  |
| BB275387                                                               | Solute carrier family 26 (sulfate transporter), member 1 (Slc26a1)                | Chloride, sulfate, and oxalate transport                                                                                   | -4.7 | -4.8 | -22.7 |
| AK003626                                                               | Solute carrier family 38, member 4 (Slc38a4)                                      | Sodium ion transport; amino acid transport                                                                                 | -2.7 | -1.7 | -4.6  |
| AB031813                                                               | Solute carrier organic anion transporter family, member 1a1 (Slco1a1)             | Organic anion transport                                                                                                    | -3.8 | -1.7 | -6.2  |
| AB031813                                                               | Solute carrier organic anion transporter family, member 1a1 (Slco1a1)             | Organic anion transport                                                                                                    | -6   | -2.3 | -13.8 |
| AK004939                                                               | Transmembrane serine protease 6 (Tmprss6)                                         | Angiogenesis; proteolysis; intracellular signaling cascade; extracellular matrix organization and biogenesis; fibrinolysis | -2.6 | -2.2 | -5.6  |
| NM_028094                                                              | UDP glucuronosyltransferase 2 family, polypeptide A3 (Ugt2a3)                     | Metabolism                                                                                                                 | -2.6 | -2.1 | -5.6  |
| BC028826                                                               | UDP glucuronosyltransferase 2 family, polypeptide B34 (Ugt2b34)                   | Metabolism                                                                                                                 | -3   | -2.4 | -7.1  |
| BC018406                                                               | cDNA                                                                              | Unknown                                                                                                                    | -2   | -1.6 | -3.2  |
| BC021614                                                               | cDNA                                                                              | Metabolism                                                                                                                 | -2.5 | -1.6 | -4.0  |
| AK009249                                                               | cDNA                                                                              | Unknown                                                                                                                    | -2.3 | -1.9 | -4.3  |
| BB822342                                                               | cDNA                                                                              | Unknown                                                                                                                    | -2.4 | -1.9 | -4.6  |
| AW111847                                                               | cDNA                                                                              | Unknown                                                                                                                    | -2.2 | -2.3 | -5.0  |
| BC025830                                                               | cDNA                                                                              | Unknown                                                                                                                    | -2.5 | -2.0 | -5.2  |
| AK016432                                                               | cDNA                                                                              | Unknown                                                                                                                    | -2.8 | -2.1 | -6.1  |
| BC018263                                                               | cDNA                                                                              | Metabolism                                                                                                                 | -3.7 | -1.7 | -6.3  |
| AI789751                                                               | cDNA                                                                              | Unknown                                                                                                                    | -3   | -3.3 | -10.0 |
| AK018631                                                               | cDNA                                                                              | Unknown                                                                                                                    | -6   | -1.7 | -10.4 |
| AI265721                                                               | cDNA                                                                              | Unknown                                                                                                                    | -4.7 | -2.2 | -10.4 |
| BB667865                                                               | cDNA                                                                              | Unknown                                                                                                                    | -4.1 | -2.6 | -10.5 |
| NM_026183                                                              | cDNA                                                                              | Unknown                                                                                                                    | -4   | -2.8 | -11.3 |
| AB056443                                                               | cDNA                                                                              | Unknown                                                                                                                    | -4.6 | -2.5 | -11.4 |
| NM_134256                                                              | cDNA                                                                              | Transport                                                                                                                  | -5   | -2.4 | -12.1 |
| AK012685                                                               | cDNA                                                                              | Unknown                                                                                                                    | -6.6 | -2.2 | -14.5 |
| AB056443                                                               | cDNA                                                                              | Unknown                                                                                                                    | -5.9 | -2.8 | -16.5 |
| <b>Up-regulated in WT-infected Mice (But Not Mutant-infected Mice)</b> |                                                                                   |                                                                                                                            |      |      |       |
| AK014526                                                               | Lipin 1 (Lpin1)                                                                   | Lipid metabolism; regulation of fat cell differentiation                                                                   | -1.8 | 2.3  |       |
| <b>Up-regulated in Mutant-infected Mice (But Not WT-infected Mice)</b> |                                                                                   |                                                                                                                            |      |      |       |
| BG969012                                                               | Activin A receptor, type II-like 1 (Acvr11)                                       | Angiogenesis; protein amino acid phosphorylation; transforming growth factor beta receptor signaling pathway               | 2.1  | -    | 2.6   |
| NM_007436                                                              | Aldehyde dehydrogenase family 3, subfamily A1 (Aldh3a1)                           | Aldehyde metabolism; electron transport; metabolism                                                                        | 2.8  | -    | 3.3   |
| BC027319                                                               | ATPase, Na <sup>+</sup> /K <sup>+</sup> transporting, beta 1 polypeptide (Atp1b1) | Potassium ion transport; sodium ion transport                                                                              | 1.7  | -    | 2.3   |

|           |                                                          |                                                                                                                                                                           |     |   |     |
|-----------|----------------------------------------------------------|---------------------------------------------------------------------------------------------------------------------------------------------------------------------------|-----|---|-----|
| NM_007689 | Chondroadherin (Chad)                                    | Regulation of cell growth; metabolism                                                                                                                                     | 2   | - | 2.2 |
| AW060797  | Coiled-coil domain containing 85A (Ccdc85a)              | Unknown                                                                                                                                                                   | 2.2 | - | 3.2 |
| BB417442  | C-type lectin domain family 1, member a (Clec1a)         | Cell adhesion                                                                                                                                                             | 2   | - | 2.8 |
| BE685667  | Cyclin D3 (Ccnd3)                                        | Regulation of progression through cell cycle; signal transduction; T cell proliferation; cell division                                                                    | 2   | - | 2.1 |
| AA410148  | Dedicator of cytokinesis 9 (Dock9)                       | Guanyl nucleotide exchange factor activity                                                                                                                                | 1.9 | - | 2.7 |
| BB626288  | Gene model 1752 (Gm1752)                                 | Unknown                                                                                                                                                                   | 1.9 | - | 2.8 |
| NM_016677 | Hippocalcin-like 1 (Hpcal1)                              | May be involved in the calcium-dependent regulation of rhodopsin phosphorylation and may be of relevance for neuronal signalling in the central nervous system            | 1.7 | - | 2.3 |
| BG066605  | Laminin, gamma 1 (Lamc1)                                 | Protein complex assembly; cell adhesion; endoderm development; positive regulation of epithelial cell proliferation; positive regulation of epithelial cell proliferation | 1.8 | - | 2.1 |
| BG066982  | Natriuretic peptide receptor 3 (Npr3)                    | Skeletal development                                                                                                                                                      | 5.1 | - | 6.0 |
| NM_013626 | Peptidylglycine alpha-amidating monooxygenase (Pam)      | Peptide metabolism                                                                                                                                                        | 2.1 | - | 2.2 |
| BQ177191  | Prickle-like 2 (Drosophila) (Prickle2)                   | Unknown                                                                                                                                                                   | 2.6 | - | 3.5 |
| AF169388  | Procollagen, type IV, alpha 4 (Col4a4)                   | Phosphate transport; cell adhesion                                                                                                                                        | 2   | - | 3.0 |
| BB305930  | Protocadherin 17 (Pcdh17)                                | Cell adhesion                                                                                                                                                             | 2.2 | - | 3.0 |
| AF112185  | Sodium channel, nonvoltage-gated, type I, alpha (Scnn1a) | Sodium ion transport; response to stimulus                                                                                                                                | 1.8 | - | 2.6 |
| BC025840  | Titin (Ttn)                                              | Carbohydrate metabolism; RNA-dependent DNA replication; protein amino acid phosphorylation; sarcomere alignment; response to oxidative stress; muscle development         | 1.8 | - | 2.2 |
| BM122301  | Transforming growth factor, beta receptor III (Tgfr3)    | Binds to TGF-beta; could be involved in capturing and retaining TGF-beta for presentation to the signaling receptors                                                      | 1.8 | - | 2.6 |
| BG064061  | Transmembrane protein 164 (Tmem164)                      | Unknown                                                                                                                                                                   | 1.8 | - | 2.3 |

|                                                                          |                                                                  |                                                                                                                                |      |   |      |
|--------------------------------------------------------------------------|------------------------------------------------------------------|--------------------------------------------------------------------------------------------------------------------------------|------|---|------|
| NM_021883                                                                | Tropomodulin 1 (Tmod1)                                           | Cytoskeleton organization and biogenesis; blocks the elongation and depolymerization of the actin filaments at the pointed end | 2.3  | - | 3.3  |
| AK019588                                                                 | Ubiquitin specific peptidase 54 (Usp54)                          | Proteolysis; ubiquitin cycle                                                                                                   | 1.7  | - | 2.2  |
| BB447914                                                                 | Zinc finger protein 503 (Zfp503)                                 | Unknown                                                                                                                        | 2    | - | 2.4  |
| BC003967                                                                 | cDNA                                                             | Unknown                                                                                                                        | 2.2  | - | 3.3  |
| BB535847                                                                 | cDNA                                                             | Unknown                                                                                                                        | 2.3  | - | 2.5  |
| BB520487                                                                 | cDNA                                                             | Unknown                                                                                                                        | 1.7  | - | 2.4  |
| AK006115                                                                 | cDNA                                                             | Unknown                                                                                                                        | 1.6  | - | 2.3  |
| <b>Down-regulated in Mutant-infected Mice (But Not WT-infected Mice)</b> |                                                                  |                                                                                                                                |      |   |      |
| NM_134130                                                                | Abhydrolase domain containing 3 (Abhd3)                          | Unknown                                                                                                                        | -2.1 | - | -2.9 |
| AK017155                                                                 | Agmatine ureohydrolase (agmatinase) (Agmat)                      | Arginine catabolism; polyamine biosynthesis                                                                                    | -2.5 | - | -3.5 |
| BB155250                                                                 | Alkylglycerone phosphate synthase (Agps)                         | Electron transport; lipid metabolism                                                                                           | -2.1 | - | -2.9 |
| NM_007493                                                                | Asialoglycoprotein receptor 2 (Asgr2)                            | Endocytosis                                                                                                                    | -2.2 | - | -3.0 |
| NM_016668                                                                | Betaine-homocysteine methyltransferase (Bhmt)                    | Protein amino acid methylation; methionine biosynthesis; regulation of homocysteine metabolism                                 | -2.9 | - | -3.5 |
| NM_022884                                                                | Betaine-homocysteine methyltransferase 2 (Bhmt2)                 | Methionine biosynthesis                                                                                                        | -1.9 | - | -2.4 |
| NM_133960                                                                | Carboxylesterase 6 (Ces6)                                        | Unknown                                                                                                                        | -2.1 | - | -2.8 |
| NM_007744                                                                | Catechol-O-methyltransferase (Comt)                              | Catecholamine metabolism; neurotransmitter catabolism; dopamine catabolism                                                     | -2.6 | - | -2.8 |
| NM_007744                                                                | Catechol-O-methyltransferase (Comt)                              | Catecholamine metabolism; neurotransmitter catabolism; dopamine catabolism                                                     | -2.7 | - | -3.4 |
| NM_015780                                                                | Complement factor H-related 1 (Cfhr1)                            | Immune response                                                                                                                | -2.9 | - | -3.4 |
| NM_010003                                                                | Cytochrome P450, family 2, subfamily c, polypeptide 39 (Cyp2c39) | Electron transport                                                                                                             | -3.1 | - | -4.7 |
| BF783609                                                                 | Cytochrome P450, family 2, subfamily j, polypeptide 5 (Cyp2j5)   | Electron transport                                                                                                             | -2.9 | - | -3.7 |
| AB039380                                                                 | Cytochrome P450, family 3, subfamily a, polypeptide 44 (Cyp3a44) | Electron transport                                                                                                             | -5.8 | - | -6.8 |
| BC028831                                                                 | Dihydropyrimidine dehydrogenase (Dpyd)                           | Electron transport; 'de novo' pyrimidine base biosynthesis                                                                     | -2.5 | - | -3.0 |
| BC028831                                                                 | Dihydropyrimidine dehydrogenase (Dpyd)                           | Electron transport; 'de novo' pyrimidine base biosynthesis                                                                     | -3.3 | - | -4.7 |
| AK004755                                                                 | Dimethylglycine dehydrogenase precursor (Dmgdh)                  | Electron transport; glycine catabolism; protein targeting                                                                      | -1.9 | - | -2.2 |

|           |                                                                    |                                                                                                                                                                                                                                                                                                                                                                                                                   |      |   |      |
|-----------|--------------------------------------------------------------------|-------------------------------------------------------------------------------------------------------------------------------------------------------------------------------------------------------------------------------------------------------------------------------------------------------------------------------------------------------------------------------------------------------------------|------|---|------|
| NM_007954 | Esterase 1 (Es1)                                                   | Metabolism                                                                                                                                                                                                                                                                                                                                                                                                        | -2.2 | - | -2.9 |
| NM_010232 | Flavin containing monooxygenase 5 (Fmo5)                           | Electron transport                                                                                                                                                                                                                                                                                                                                                                                                | -2.7 | - | -2.7 |
| NM_010232 | Flavin containing monooxygenase 5 (Fmo5)                           | Electron transport                                                                                                                                                                                                                                                                                                                                                                                                | -3   | - | -3.1 |
| AI391218  | Glutamate-ammonia ligase (glutamine synthetase) (Glul)             | Glutamine biosynthesis; nitrogen compound metabolism                                                                                                                                                                                                                                                                                                                                                              | -2.1 | - | -2.3 |
| AK005016  | Heat-responsive protein 12 (Hrsp12)                                | regulation of translational termination                                                                                                                                                                                                                                                                                                                                                                           | -2.1 | - | -2.9 |
| NM_010517 | Insulin-like growth factor binding protein 4 (Igfbp4)              | Skeletal development; regulation of cell growth; DNA metabolism; signal transduction; cell proliferation                                                                                                                                                                                                                                                                                                          | -2.1 | - | -2.5 |
| NM_133809 | Kynurenine 3-monooxygenase (kynurenine 3-hydroxylase) (Kmo)        | Electron transport; aromatic compound metabolism                                                                                                                                                                                                                                                                                                                                                                  | -2   | - | -2.6 |
| AK018630  | Nuclear receptor subfamily 1, group I, member 2 (Nr1i2)            | Transcription regulation; xenobiotic metabolism; signal transduction; steroid metabolism                                                                                                                                                                                                                                                                                                                          | -2.3 | - | -3.2 |
| NM_008769 | Ornithine transcarbamylase (Otc)                                   | Urea cycle; amino acid metabolism; arginine biosynthesis                                                                                                                                                                                                                                                                                                                                                          | -2.9 | - | -3.9 |
| NM_020573 | Oxysterol binding protein-like 1A (Osbp1a)                         | Lipid transport; steroid metabolism; cholesterol metabolism; vesicle-mediated transport                                                                                                                                                                                                                                                                                                                           | -2.1 | - | -2.5 |
| AI265463  | Phosphoenolpyruvate carboxykinase 1, cytosolic (Pck1)              | Gluconeogenesis; lipid metabolism; glycerol biosynthesis from pyruvate                                                                                                                                                                                                                                                                                                                                            | -3.5 | - | -3.3 |
| NM_011082 | Polymeric immunoglobulin receptor (Pigr)                           | Protein secretion                                                                                                                                                                                                                                                                                                                                                                                                 | -2.1 | - | -2.8 |
| BG071940  | Protein phosphatase 1, regulatory (inhibitor) subunit 3B (Ppr1r3b) | Glycogen metabolism                                                                                                                                                                                                                                                                                                                                                                                               | -3.5 | - | -5.0 |
| NM_011261 | Reelin (Reln)                                                      | Cellular morphogenesis during differentiation; neuron migration; cell adhesion; development; axon guidance; central nervous system development; brain development; locomotory behavior; glial cell differentiation; peptidyl-tyrosine phosphorylation; spinal cord patterning; positive regulation of protein kinase activity; response to pain; positive regulation of small GTPase mediated signal transduction | -1.8 | - | -2.5 |

|           |                                                                                 |                                                                                                                                                         |      |   |      |
|-----------|---------------------------------------------------------------------------------|---------------------------------------------------------------------------------------------------------------------------------------------------------|------|---|------|
| NM_009060 | Regucalcin (Rgn)                                                                | May play a role in the regulation of enzymatic activity in the liver; decrease of rgn leads to the dysregulation of calcium signaling in the aged liver | -3.1 | - | -3.9 |
| BB035017  | Retinoic acid receptor responder (tazarotene induced) 1 (Rarres1)               | Negative regulation of cell proliferation                                                                                                               | -3.1 | - | -3.2 |
| BC013442  | Solute carrier family 27 (fatty acid transporter), member 2 (Slc27a2)           | Very-long-chain fatty acid metabolism; lipid metabolism; fatty acid metabolism                                                                          | -2.6 | - | -3.5 |
| NM_008063 | Solute carrier family 37 (glycerol-6-phosphate transporter), member 4 (Slc37a4) | Carbohydrate metabolism and transport                                                                                                                   | -2.6 | - | -3.4 |
| AB037192  | Solute carrier organic anion transporter family, member 1b2 (Slco1b2)           | Ion transport                                                                                                                                           | -2.6 | - | -2.4 |
| NM_020495 | Solute carrier organic anion transporter family, member 1b2 (Slco1b2)           | Ion transport                                                                                                                                           | -2.5 | - | -2.7 |
| D87867    | UDP glucuronosyltransferase 1 family, polypeptide A2 (Ugt1a2)                   | Glucuronate metabolism; xenobiotic metabolism; protein folding                                                                                          | -1.8 | - | -2.2 |
| NM_053215 | UDP glucuronosyltransferase 2 family, polypeptide B37 (Ugt2b37)                 | Metabolism                                                                                                                                              | -5.1 | - | -6.3 |
| BC022133  | Urocanase domain containing 1 (Uroc1)                                           | Histidine metabolism                                                                                                                                    | -2.2 | - | -3.0 |
| BC025105  | V-set and immunoglobulin domain containing 4 (Vsig4)                            | Negative regulation of murine and human T cell proliferation and IL-2 production                                                                        | -2.3 | - | -2.8 |
| AV030118  | cDNA                                                                            | Unknown                                                                                                                                                 | -2.1 | - | -2.1 |
| AW488243  | cDNA                                                                            | Unknown                                                                                                                                                 | -2.4 | - | -2.3 |
| NM_009286 | cDNA                                                                            | Unknown                                                                                                                                                 | -2.4 | - | -2.7 |
| AV222559  | cDNA                                                                            | Unknown                                                                                                                                                 | -2   | - | -2.9 |
| AJ132857  | cDNA                                                                            | Transport                                                                                                                                               | -3.1 | - | -3.9 |

Fold-changes (FC) shown were statistically significant (i.e., Benjamini and Hochberg corrected p value <0.05 and absolute consistency across all replicate experiments). A negative sign before values indicates down-regulation. A dash “-“ indicates no statistical difference was observed. C = control (uninfected) mice; WT=wild-type *Y. pestis* CO92 infected mice; Mut= $\Delta$ *lpp* mutant of *Y. pestis* CO92 infected mice.



**Supplementary Table VII. Genes statistically differentially expressed in the lungs of mice infected for 48 hr with a  $\Delta mpp$  mutant of *Y. pestis* CO92, compared to WT bacteria**

| GenBank ID                                                      | Gene Name                                                                                              | Function                                                                                                                     | WT vs Mut | C vs WT | C vs Mut |
|-----------------------------------------------------------------|--------------------------------------------------------------------------------------------------------|------------------------------------------------------------------------------------------------------------------------------|-----------|---------|----------|
| <i>FC</i>                                                       |                                                                                                        |                                                                                                                              |           |         |          |
| <b><i>Up-regulated in Both WT- and Mutant-infected Mice</i></b> |                                                                                                        |                                                                                                                              |           |         |          |
| BB443585                                                        | A disintegrin-like and metalloprotease (reprolysin type) with thrombospondin type 1 motif, 4 (Adamts4) | Skeletal development; integrin-mediated signaling; proteolysis; metallopeptidase activity                                    | 4.02      | 2.2     | 8.9      |
| BG064671                                                        | A disintegrin-like and metalloprotease (reprolysin type) with thrombospondin type 1 motif, 4 (Adamts4) | Skeletal development; integrin-mediated signaling; proteolysis; metallopeptidase activity                                    | 6.63      | 2.6     | 17.5     |
| BC026209                                                        | Arachidonate 5-lipoxygenase activating protein (Alox5ap)                                               | Leukotriene biosynthesis; inflammatory response                                                                              | 1.87      | 1.6     | 3        |
| AV002218                                                        | Arginase type II (Arg2)                                                                                | Urea cycle; arginine metabolism; nitric oxide biosynthesis; striated muscle contraction                                      | 4.53      | 2.6     | 11.9     |
| AK011545                                                        | Brain abundant, membrane attached signal protein 1 (Basp1)                                             | Transcription regulation                                                                                                     | 3.14      | 1.5     | 4.8      |
| NM_007609                                                       | Caspase 4, apoptosis-related cysteine peptidase (Casp4)                                                | Proteolysis; regulation of apoptosis                                                                                         | 2.18      | 2       | 4.3      |
| AV006463                                                        | cDNA                                                                                                   | Unknown                                                                                                                      | 2.73      | 2.2     | 6        |
| BB239429                                                        | cDNA                                                                                                   | Unknown                                                                                                                      | 3.26      | 5.8     | 18.9     |
| AF065933                                                        | Chemokine (C-C motif) ligand 2 (Ccl2)                                                                  | Chemotaxis; inflammatory response; immune response; signal transduction                                                      | 5.05      | 3.4     | 17.1     |
| AF099052                                                        | Chemokine (C-C motif) ligand 20 (Ccl20)                                                                | Chemotaxis; inflammatory response; immune response; signal transduction; cell-cell signaling; antimicrobial humoral response | 4.69      | 1.6     | 7.5      |
| NM_011337                                                       | Chemokine (C-C motif) ligand 3 (Ccl3)                                                                  | Chemotaxis; inflammatory response; immune response; signal transduction                                                      | 10.02     | 4.1     | 40.8     |
| AF128218                                                        | Chemokine (C-C motif) ligand 4 (Ccl4)                                                                  | Chemotaxis; inflammatory response; immune response; signal transduction                                                      | 7.92      | 2.1     | 16.9     |

|           |                                                  |                                                                                                                                                                                                         |      |      |       |
|-----------|--------------------------------------------------|---------------------------------------------------------------------------------------------------------------------------------------------------------------------------------------------------------|------|------|-------|
| AJ318863  | Chemokine (C-C motif) receptor-like 2 (Ccr12)    | G-protein coupled receptor protein signaling pathway                                                                                                                                                    | 3.75 | 2.6  | 9.6   |
| BB554288  | Chemokine (C-X-C motif) ligand 1 (Cxcl1)         | Regulation of progression through cell cycle; inflammatory response; immune response                                                                                                                    | 3.12 | 3.6  | 11.2  |
| BB554288  | Chemokine (C-X-C motif) ligand 1 (Cxcl1)         | Regulation of progression through cell cycle; inflammatory response; immune response                                                                                                                    | 3.83 | 4.9  | 18.7  |
| NM_019494 | Chemokine (C-X-C motif) ligand 11 (Cxcl11)       | Chemotaxis; inflammatory response; immune response; signal transduction; cell-cell signaling                                                                                                            | 3.59 | 10.9 | 39.2  |
| NM_009140 | Chemokine (C-X-C motif) ligand 2 (Cxcl2)         | Chemotaxis; inflammatory response; immune response; signal transduction                                                                                                                                 | 9.29 | 18.2 | 169.1 |
| NM_009141 | Chemokine (C-X-C motif) ligand 6 (Cxcl6)         | Chemotaxis; inflammatory response; immune response; signal transduction                                                                                                                                 | 7.41 | 9.3  | 69    |
| NM_009971 | Colony stimulating factor 3 (granulocyte) (Csf3) | Immune response; cellular defense response; cell-cell signaling; development; positive regulation of cell proliferation; cytokine and chemokine mediated signaling pathway; granulocyte differentiation | 5.7  | 2.1  | 11.9  |
| NM_010819 | C-type lectin domain family 4, member d (Clec4d) | Immune response                                                                                                                                                                                         | 3.48 | 3.6  | 12.6  |
| NM_019948 | C-type lectin domain family 4, member e (Clec4e) | Immune response; cell adhesion; antimicrobial humoral response                                                                                                                                          | 6.67 | 2.3  | 15.5  |
| NM_019948 | C-type lectin domain family 4, member e (Clec4e) | Immune response; cell adhesion; antimicrobial humoral response                                                                                                                                          | 4.21 | 6.8  | 28.4  |

|           |                                                                                                               |                                                                                                                                                                                                                                                                                                                                                                                                                                                                                                                                                                                                                                                                                                                                                                                                                              |      |      |       |
|-----------|---------------------------------------------------------------------------------------------------------------|------------------------------------------------------------------------------------------------------------------------------------------------------------------------------------------------------------------------------------------------------------------------------------------------------------------------------------------------------------------------------------------------------------------------------------------------------------------------------------------------------------------------------------------------------------------------------------------------------------------------------------------------------------------------------------------------------------------------------------------------------------------------------------------------------------------------------|------|------|-------|
| NM_007950 | Epiregulin (Ereg)                                                                                             | Regulation of progression through cell cycle; angiogenesis; positive regulation of cytokine production; epidermal growth factor receptor signaling pathway; development; cell proliferation; transcription regulation; organ morphogenesis; cytokine and chemokine mediated signaling pathway; cell differentiation; luteinizing hormone signaling pathway; keratinocyte proliferation; positive regulation of innate immune response; positive regulation of IL-6 biosynthesis; positive regulation of fibroblast proliferation /// primary follicle stage oogenesis (sensu Mammalia) /// positive regulation of smooth muscle cell proliferation /// negative regulation of epithelial cell proliferation; negative regulation of epithelial cell proliferation; negative regulation of smooth muscle cell differentiation | 5.74 | 1.6  | 9.3   |
| BG067531  | EST                                                                                                           | Unknown                                                                                                                                                                                                                                                                                                                                                                                                                                                                                                                                                                                                                                                                                                                                                                                                                      | 2.56 | 2.5  | 6.4   |
| BG961961  | EST                                                                                                           | Unknown                                                                                                                                                                                                                                                                                                                                                                                                                                                                                                                                                                                                                                                                                                                                                                                                                      | 6.79 | 5.5  | 37.4  |
| AV370830  | Free fatty acid receptor 2 (Ffar2)                                                                            | G-protein coupled receptor protein signaling pathway                                                                                                                                                                                                                                                                                                                                                                                                                                                                                                                                                                                                                                                                                                                                                                         | 1.95 | 1.5  | 3     |
| BB829808  | Gene model 1960 (Gm1960)                                                                                      | Immune response                                                                                                                                                                                                                                                                                                                                                                                                                                                                                                                                                                                                                                                                                                                                                                                                              | 9.15 | 15.9 | 145.1 |
| U05264    | Glycoprotein 49 A (Gp49a); also called leukocyte immunoglobulin-like receptor, subfamily B, member 4 (Lilrb4) | Immune response                                                                                                                                                                                                                                                                                                                                                                                                                                                                                                                                                                                                                                                                                                                                                                                                              | 2.95 | 2.4  | 7.2   |
| BC011246  | Hemopexin (Hpxn)                                                                                              | Iron ion homeostasis; heme transport                                                                                                                                                                                                                                                                                                                                                                                                                                                                                                                                                                                                                                                                                                                                                                                         | 2.53 | 2.3  | 5.8   |

|           |                                                     |                                                                                                                                                                                                                                                                                                                                           |      |      |      |
|-----------|-----------------------------------------------------|-------------------------------------------------------------------------------------------------------------------------------------------------------------------------------------------------------------------------------------------------------------------------------------------------------------------------------------------|------|------|------|
| BM246462  | Hypothetical Immunoglobulin-like containing protein | Unknown                                                                                                                                                                                                                                                                                                                                   | 2.28 | 1.9  | 4.4  |
| NM_030691 | Immunoglobulin superfamily, member 6 (Igsf6)        | Cell adhesion and immune functions (by inference)                                                                                                                                                                                                                                                                                         | 2.83 | 2.8  | 7.8  |
| L38281    | Immunoresponsive gene 1 (Irg1)                      | Immune response                                                                                                                                                                                                                                                                                                                           | 7.09 | 10.9 | 77.4 |
| NM_019777 | Inhibitor of kappaB kinase epsilon (Ikbke)          | Protein amino acid phosphorylation; immune response; regulation of I-kappaB kinase/NF-kappaB cascade                                                                                                                                                                                                                                      | 2.61 | 1.8  | 4.7  |
| NM_011940 | Interferon activated gene 202B (Ifi202b)            | Immune response                                                                                                                                                                                                                                                                                                                           | 2.92 | 2.9  | 8.5  |
| K00083    | Interferon gamma (Ifng)                             | Regulation of cell growth; neutrophil apoptosis; inflammatory cell apoptosis; cell motility; immune response; response to virus; antigen processing and presentation; neutrophil chemotaxis; unfolded protein response; negative regulation of myelination; defense response to bacterium ; positive regulation of chemokine biosynthesis | 6.68 | 4.3  | 28.4 |
| BC003727  | Interleukin 1 alpha (IL-1a)                         | Regulation of progression through cell cycle; fever; regulation of apoptosis; chemotaxis; inflammatory response; immune response; cell-cell signaling' regulation of cell proliferation                                                                                                                                                   | 6.75 | 1.6  | 10.5 |
| AY071843  | Interleukin 1 family, member 9 (IL1f9)              | Immune response; cell-cell signaling                                                                                                                                                                                                                                                                                                      | 4.45 | 2.1  | 9.4  |
| M57525    | Interleukin 1 receptor antagonist (Ilrn1)           | Lipid metabolism; inflammatory response; immune response; cell surface receptor linked signal transduction;insulin secretion                                                                                                                                                                                                              | 5.13 | 3.8  | 19.7 |
| NM_010555 | Interleukin 1 receptor, type II (Il1r2)             | Immune response; cell surface receptor linked signal transduction                                                                                                                                                                                                                                                                         | 3.96 | 5.2  | 20.7 |

|           |                                                    |                                                                                                                                                                                                                                                                                                                                                                                   |      |      |      |
|-----------|----------------------------------------------------|-----------------------------------------------------------------------------------------------------------------------------------------------------------------------------------------------------------------------------------------------------------------------------------------------------------------------------------------------------------------------------------|------|------|------|
| NM_010552 | Interleukin 17A (Il17a)                            | Protein amino acid glycosylation; apoptosis; inflammatory response; cell-cell signaling; cell death<br>Neutrophil apoptosis; acute-phase response; humoral immune response; cell surface receptor linked signal transduction; cell-cell signaling; regulation of cell proliferation; regulation of chemokine biosynthesis; positive regulation of T-helper 2 cell differentiation | 2.73 | 1.7  | 4.5  |
| NM_031168 | Interleukin 6 (IL-6)                               | Protein amino acid phosphorylation; cytokine and chemokine mediated signaling pathway; regulation of apoptosis; regulation of protein complex disassembly; signal transduction                                                                                                                                                                                                    | 5.01 | 34.3 | 172  |
| AV228493  | Interleukin-1 receptor-associated kinase 3 (Irak3) | Immune response; transmembrane receptor protein tyrosine kinase signaling pathway; intracellular signaling cascade; mast cell activation; cytokine secretion                                                                                                                                                                                                                      | 3.36 | 1.6  | 5.3  |
| BC006948  | Lymphocyte cytosolic protein 2 (Lcp2)              | May be involved in coupling the protein kinase c and calmodulin signal transduction systems                                                                                                                                                                                                                                                                                       | 2.62 | 1.6  | 4.2  |
| AV110584  | MARCKS-like 1                                      | Peptidoglycan metabolism; proteolysis; collagen catabolism                                                                                                                                                                                                                                                                                                                        | 3.64 | 2.8  | 10.3 |
| NM_010809 | Matrix metalloproteinase 3 (Mmp3)                  | Peptidoglycan metabolism; proteolysis; collagen catabolism                                                                                                                                                                                                                                                                                                                        | 4.51 | 2    | 8.9  |
| NM_008611 | Matrix metalloproteinase 8 (Mmp8)                  | Peptidoglycan metabolism; skeletal development; proteolysis; extracellular matrix organization and biogenesis; macrophage differentiation; collagen catabolism; positive regulation of apoptosis                                                                                                                                                                                  | 2.75 | 5.6  | 15.5 |
| NM_013599 | Matrix metalloproteinase 9 (Mmp9)                  |                                                                                                                                                                                                                                                                                                                                                                                   | 2.62 | 1.9  | 5    |

|           |                                                                                                |                                                                                                                                                                                                                                                                          |      |     |      |
|-----------|------------------------------------------------------------------------------------------------|--------------------------------------------------------------------------------------------------------------------------------------------------------------------------------------------------------------------------------------------------------------------------|------|-----|------|
| AV228517  | MAX dimerization protein 1 (Mxd1)                                                              | Transcription regulation; development; cell proliferation                                                                                                                                                                                                                | 3.54 | 4.5 | 16   |
| NM_019453 | Mediterranean fever (Mefv)                                                                     | Inflammatory response                                                                                                                                                                                                                                                    | 2.71 | 2.6 | 6.9  |
| AI462015  | Nuclear factor of kappa light chain gene enhancer in B-cells inhibitor, alpha (Nfkbia)         | Apoptosis; cytoplasmic sequestering of NF-kappaB; regulation of cell proliferation; regulation of NF-kappaB import into nucleus; negative regulation of DNA binding; negative regulation of myeloid cell differentiation; negative regulation of Notch signaling pathway | 1.8  | 2.1 | 3.8  |
| AK011965  | Nuclear factor of kappa light polypeptide gene enhancer in B-cells inhibitor, epsilon (Nfkbie) | Transcription regulation; cytoplasmic sequestering of transcription factor                                                                                                                                                                                               | 2.46 | 1.8 | 4.4  |
| AB026551  | Nuclear factor of kappa light polypeptide gene enhancer in B-cells inhibitor, zeta (Nfkbiz)    | Transcription regulation; inflammatory response                                                                                                                                                                                                                          | 4.54 | 2.1 | 9.6  |
| AB026551  | Nuclear factor of kappa light polypeptide gene enhancer in B-cells inhibitor, zeta (Nfkbiz)    | Transcription regulation; inflammatory response                                                                                                                                                                                                                          | 3.18 | 2.6 | 8.3  |
| AY061760  | Nuclear factor, interleukin 3, regulated (Nfil3)                                               | Transcription regulation                                                                                                                                                                                                                                                 | 3.07 | 3   | 9.3  |
| AV290148  | Olfactomedin 4 (Olfm4)                                                                         | Unknown                                                                                                                                                                                                                                                                  | 3.75 | 7.3 | 27.3 |
| NM_008987 | Pentraxin related gene (Ptx3)                                                                  | Response to yeast; inflammatory response; opsonization; positive regulation of nitric oxide biosynthesis; positive regulation of phagocytosis                                                                                                                            | 5.39 | 3.3 | 17.8 |
| AV230647  | Phosphoinositide-3-kinase, regulatory subunit 5, p101 (Pik3r5)                                 | Signal transduction                                                                                                                                                                                                                                                      | 1.96 | 1.5 | 3    |
| AK005158  | Phospholipase A2, group VII (platelet-activating factor acetylhydrolase, plasma) (Pla2g7)      | Inflammatory response; lipid catabolism                                                                                                                                                                                                                                  | 2.64 | 2   | 5.2  |
| AF181829  | Pleckstrin (Plek)                                                                              | Intracellular signaling cascade                                                                                                                                                                                                                                          | 3.6  | 1.7 | 6.3  |

|           |                                                                              |                                                                                                                                                                                                                      |      |     |      |
|-----------|------------------------------------------------------------------------------|----------------------------------------------------------------------------------------------------------------------------------------------------------------------------------------------------------------------|------|-----|------|
| M94967    | Prostaglandin-endoperoxide synthase 2 (Ptgs2)                                | Prostaglandin biosynthesis; fatty acid biosynthesis; cell motility; blood pressure regulation; lipid biosynthesis; cyclooxygenase pathway; keratinocyte differentiation; anagen; regulation of inflammatory response | 5.64 | 1.7 | 9.8  |
| BB223018  | Schlafen 1 (Slfn1)                                                           | G1/S transition of mitotic cell cycle; cell cycle arrest; negative regulation of cell proliferation                                                                                                                  | 3.19 | 1.6 | 5    |
| M72332    | Selectin, platelet (Selp)                                                    | Inflammatory response; cell adhesion                                                                                                                                                                                 | 2.64 | 2.1 | 5.5  |
| NM_008871 | Serine (or cysteine) peptidase inhibitor, clade E, member 1 (Serpine1)       | Blood coagulation; fibrinolysis; regulation of angiogenesis                                                                                                                                                          | 3.67 | 4   | 14.8 |
| NM_011314 | Serum amyloid A 1 (Saa1)                                                     | Acute-phase response                                                                                                                                                                                                 | 6.91 | 5.2 | 36   |
| NM_009117 | Serum amyloid A 1 (Saa1)                                                     | Acute-phase response                                                                                                                                                                                                 | 9.33 | 7.7 | 71.9 |
| NM_011314 | Serum amyloid A 2 (Saa2)                                                     | Acute-phase response                                                                                                                                                                                                 | 3.68 | 2.1 | 7.7  |
| NM_023044 | Solute carrier family 15, member 3 (Slc15a3)                                 | Oligopeptide transport                                                                                                                                                                                               | 2.65 | 2.2 | 5.8  |
| BM209618  | Solute carrier family 2 (facilitated glucose transporter), member 1 (Slc2a1) | Carbohydrate transport; glucose transport                                                                                                                                                                            | 3.23 | 2   | 6.6  |
| BB399837  | Solute carrier family 39 (zinc transporter), member 14 (Slc39a14)            | Metal ion transport                                                                                                                                                                                                  | 2.42 | 2.4 | 5.7  |
| AK010399  | Sorting nexin 10 (Snx10)                                                     | Cell communication; intracellular signaling cascade; protein transport                                                                                                                                               | 2.14 | 1.8 | 3.8  |
| BB667930  | Stefin A2 like 1 (Stfa211)                                                   | Unknown                                                                                                                                                                                                              | 3.92 | 3.4 | 13.3 |
| NM_013671 | Superoxide dismutase 2, mitochondrial (Sod2)                                 | Response to superoxide; age-dependent response to reactive oxygen species; transcription regulation; superoxide metabolism; response to oxidative stress                                                             | 2.91 | 1.7 | 4.9  |

|                                                                               |                                                          |                                                                                                                                                          |      |     |      |
|-------------------------------------------------------------------------------|----------------------------------------------------------|----------------------------------------------------------------------------------------------------------------------------------------------------------|------|-----|------|
| NM_013671                                                                     | Superoxide dismutase 2, mitochondrial (Sod2)             | Response to superoxide; age-dependent response to reactive oxygen species; transcription regulation; superoxide metabolism; response to oxidative stress | 2.58 | 1.9 | 4.8  |
| BB277065                                                                      | Traf2 binding protein (T2bp)                             | I-kappaB kinase/NF-kappaB cascade                                                                                                                        | 2.5  | 2.7 | 6.9  |
| BB784999                                                                      | Triggering receptor expressed on myeloid cells 1 (Trem1) | Humoral immune response; intracellular signaling cascade                                                                                                 | 3.67 | 2   | 7.2  |
| NM_021406                                                                     | Triggering receptor expressed on myeloid cells 1 (Trem1) | Humoral immune response; intracellular signaling cascade                                                                                                 | 5.12 | 2.5 | 12.8 |
| BM241351                                                                      | Tumor necrosis factor, alpha-induced protein 3 (Tnfaip3) | Ubiquitin cycle; regulation of apoptosis; negative regulation of I-kappaB kinase/NF-kappaB cascade                                                       | 3.5  | 2.7 | 9.5  |
| <b><i>Up-regulated in Mutant-infected Mice (But Not WT-infected Mice)</i></b> |                                                          |                                                                                                                                                          |      |     |      |
| BC011338                                                                      | Baculoviral IAP repeat-containing 3 (Birc3)              | Regulation of apoptosis; cell surface receptor linked signal transduction                                                                                | 1.83 | -   | 2.2  |
| L16462                                                                        | B-cell leukemia/lymphoma 2 related protein A1a (Bcl2a1a) | Regulation of apoptosis                                                                                                                                  | 2.34 | -   | 3.5  |
| NM_007651                                                                     | CD53 antigen (Cd53)                                      | Signal transduction; antimicrobial humoral response                                                                                                      | 1.99 | -   | 2.1  |
| AV231983                                                                      | cDNA                                                     | Unknown                                                                                                                                                  | 3.1  | -   | 4.2  |
| AK016659                                                                      | cDNA                                                     | Lipid metabolism; sphingolipid metabolism; sphingomyelin biosynthesis                                                                                    | 2.65 | -   | 2.7  |
| BB531414                                                                      | cDNA                                                     | Unknown                                                                                                                                                  | 2.12 | -   | 3.1  |
| AF252873                                                                      | Chemokine (C-X-C motif) ligand 14 (Cxcl14)               | Chemotaxis; inflammatory response; immune response; signal transduction; cell-cell signaling                                                             | 2.71 | -   | 2.7  |
| BC024886                                                                      | Coagulation factor III (F3)                              | Immune response; blood coagulation                                                                                                                       | 2.18 | -   | 2.4  |
| NM_007972                                                                     | Coagulation factor X (F10)                               | Proteolysis; blood coagulation                                                                                                                           | 2.41 | -   | 3    |
| BM238701                                                                      | Dual specificity phosphatase 16 (Dusp16)                 | Inactivation of MAPK activity; protein amino acid dephosphorylation                                                                                      | 2.63 | -   | 2.7  |



|           |                                                      |                                                                                                                                                                                                                                |      |   |     |
|-----------|------------------------------------------------------|--------------------------------------------------------------------------------------------------------------------------------------------------------------------------------------------------------------------------------|------|---|-----|
| NM_007913 | Early growth response 1 (Egr1)                       | Transcription regulation;<br>T cell differentiation                                                                                                                                                                            | 3.03 | - | 3   |
| BB284358  | EGL nine homolog 3 (Egln3)                           | Apoptosis; protein<br>metabolism                                                                                                                                                                                               | 3.81 | - | 3.6 |
| NM_010119 | EH-domain containing 1 (Ehd1)                        | Endocytosis; endosome<br>transport                                                                                                                                                                                             | 2.18 | - | 2.5 |
| BM234652  | ERO1-like (S. cerevisiae)                            | electron transport ///<br>protein folding /// protein<br>folding /// transport ///<br>unfolded protein<br>response /// protein<br>biosynthesis ///<br>chaperone cofactor-<br>dependent protein<br>folding                      | 3.59 | - | 3.7 |
| NM_013521 | Formyl peptide receptor 1 (Fpr1)                     | Activation of MAPK<br>activity; cell motility;<br>chemotaxis; inflammatory<br>response; G-protein<br>signaling, coupled to<br>cAMP; nitric oxide<br>mediated signal<br>transduction                                            | 2.47 | - | 3.6 |
| AV370830  | Free fatty acid receptor 2 (Ffar2)                   | G-protein coupled<br>receptor protein<br>signaling pathway                                                                                                                                                                     | 2.47 | - | 3.6 |
| AF276917  | Glutaredoxin (Glx)                                   | Electron transport; cell<br>redox homeostasis                                                                                                                                                                                  | 2.17 | - | 2.4 |
| BF683028  | Glycerol kinase (Gyk)                                | Carbohydrate<br>metabolism; glycerol<br>metabolism; glycerol-3-<br>phosphate metabolism                                                                                                                                        | 2.37 | - | 3   |
| NM_013820 | Hexokinase 2 (Hk2)                                   | Regulation of<br>progression through cell<br>cycle; glucose<br>metabolism; glycolysis                                                                                                                                          | 2.2  | - | 2.4 |
| BG072171  | Histidine decarboxylase (Hdc)                        | Amino acid and<br>derivative metabolism;<br>histidine and carboxylic<br>acid metabolism;<br>catecholamine<br>biosynthesis                                                                                                      | 3.12 | - | 2.9 |
| BB102620  | Hypothetical protein                                 | Unknown                                                                                                                                                                                                                        | 4.02 | - | 5.1 |
| X95580    | Hypoxia inducible factor 1, alpha<br>subunit (Hif1a) | Two-component signal<br>transduction system<br>(phosphorelay);<br>angiogenesis; response<br>to hypoxia; neural crest<br>cell migration; heart<br>looping; transcription<br>regulation; cell<br>differentiation;<br>homeostasis | 2.23 | - | 2.6 |

|           |                                                                                                         |                                                                                                                                                                                                                                     |      |   |     |
|-----------|---------------------------------------------------------------------------------------------------------|-------------------------------------------------------------------------------------------------------------------------------------------------------------------------------------------------------------------------------------|------|---|-----|
| NM_008332 | Interferon-induced protein with tetratricopeptide repeats 2 (Ifit2)                                     | Immune response                                                                                                                                                                                                                     | 3.57 | - | 4.9 |
| AJ249492  | Interleukin 22 (IL22); also called interleukin 10-related T cell-derived inducible factor beta (Iltifb) | Oxygen and reactive oxygen species metabolism; immune response; regulation of tyrosine phosphorylation of Stat3 protein                                                                                                             | 2.89 | - | 3.7 |
| BM247104  | Kelch-like 6 (Klhl6)                                                                                    | Unknown                                                                                                                                                                                                                             | 1.9  | - | 2.7 |
| AA270173  | Lamin B1 (Lmnb1)                                                                                        | Component of the nuclear lamina; thought to provide a framework for the nuclear envelope; may interact with chromatin; thought to be involved in nuclear stability, chromatin structure and gene expression                         | 3.55 | - | 4.9 |
| AF065917  | Leukemia inhibitory factor (Lif)                                                                        | Immune response; cell surface receptor linked signal transduction; cell-cell signaling; development; positive regulation of cell proliferation; tyrosine phosphorylation of Stat3 protein; muscle morphogenesis; neuron development | 3.36 | - | 4.7 |
| BB491008  | MARCKS-like 1                                                                                           | May be involved in coupling the protein kinase c and calmodulin signal transduction systems                                                                                                                                         | 2.96 | - | 3.6 |
| AK014467  | Mucolipin 2 (Mcoln2)                                                                                    | Cation transport                                                                                                                                                                                                                    | 2.52 | - | 3.6 |
| AI844633  | Neutrophil cytosolic factor 1 (Ncf1)                                                                    | Electron transport; leukotriene metabolism; NADP catabolism; inflammatory response; cellular defense response; cell communication; cell proliferation; response to bacterium                                                        | 2.68 | - | 3.3 |
| BB775785  | Paired immunoglobulin-like type 2 receptor alpha (Pilra)                                                | Signal transduction                                                                                                                                                                                                                 | 2.29 | - | 2.7 |
| BG793493  | Phosphodiesterase 4B, cAMP specific (Pde4b)                                                             | Smooth muscle contraction; signal transduction                                                                                                                                                                                      | 2.56 | - | 2.3 |

|           |                                                                     |                                                                                                                                                                                                                                                                                                                       |      |   |     |
|-----------|---------------------------------------------------------------------|-----------------------------------------------------------------------------------------------------------------------------------------------------------------------------------------------------------------------------------------------------------------------------------------------------------------------|------|---|-----|
| BM246564  | Phosphodiesterase 4B, cAMP specific (Pde4b)                         | Smooth muscle contraction; signal transduction                                                                                                                                                                                                                                                                        | 2.15 | - | 2.5 |
| A1561611  | PML-RAR alpha-regulated adaptor molecule 1 (Pram1)                  | Integrin-mediated signaling pathway; regulation of neutrophil degranulation                                                                                                                                                                                                                                           | 1.79 | - | 2.2 |
| BB730139  | Prostaglandin E synthase (Ptges)                                    | Prostaglandin metabolism; signal transduction; antimicrobial humoral response                                                                                                                                                                                                                                         | 2.55 | - | 3   |
| AK008416  | RAP2C, member of RAS oncogene family (Rap2c)                        | Small GTPase mediated signal transduction; protein transport                                                                                                                                                                                                                                                          | 1.96 | - | 2.3 |
| BB667823  | Ring finger protein 125 (Rnf125)                                    | Ubiquitin cycle; immune response                                                                                                                                                                                                                                                                                      | 1.99 | - | 2.1 |
| T12280    | Ring finger protein 149 (Rnf149)                                    | Proteolysis; ubiquitin cycle                                                                                                                                                                                                                                                                                          | 2.26 | - | 2.9 |
| NM_023380 | SAM domain, SH3 domain and nuclear localization signals, 1 (Samsn1) | Putative adaptor and scaffold protein                                                                                                                                                                                                                                                                                 | 5.27 | - | 7.1 |
| AV271736  | Spermatogenesis associated 13 (Spata13)                             | Regulation of Rho protein signal transduction                                                                                                                                                                                                                                                                         | 2.2  | - | 3.1 |
| NM_025288 | Stefin A3 (Stfa3); also called cystatin A (Csta)                    | Cysteine protease inhibition; forms tight complexes with papain and the cathepsins B, H, and L; encodes one of the precursor proteins of cornified cell envelope in keratinocytes and plays a role in epidermal development and maintenance; Stefins have been proposed as prognostic and diagnostic tools for cancer | 2.42 | - | 3.3 |
| BC010465  | Testis derived transcript (Tes)                                     | May act as a tumor suppressor                                                                                                                                                                                                                                                                                         | 2.25 | - | 2.1 |

Fold-changes (FC) shown were statistically significant (i.e., Benjamini and Hochberg corrected p value <0.05 and absolute consistency across all replicate experiments). A negative sign before values indicates down-regulation. A dash “-“ indicates no statistical difference was observed. C = control (uninfected) mice; WT=wild-type *Y. pestis* CO92 infected mice; Mut= $\Delta lpp$  mutant of *Y. pestis* CO92 infected mice.
